# Supplementary material for: Identification and verification of biomarkers related to senescence-associated secretory phenotype in type 2 diabetes
Source: Research Square preprint supplement (doi:10.21203/rs.3.rs-7839443/v1), 2025-11-11
Supplement: Supplementary file 1 [file 448cd2d6e08d044bcf3eb396.xlsx]

## Sheet: 02.deg_sig_res
Online Resource 2. The complete list of DEGs identified in the GSE15932 dataset (T2DM vs. Control).
	logFC	AveExpr	t	P.Value	adj.P.Val	B
SPI1	1.13929576388369	7.40463918986971	6.96669771080733	1.62926738305574e-06	0.0180425699805663	5.16754334052765
DDR1-AS1	0.991835755440875	5.77587376814991	6.84991479721612	2.04132628598386e-06	0.0180425699805663	4.96995121411728
ACTN4	0.979714268239483	8.11984	6.67225161341608	2.88682908455439e-06	0.0180425699805663	4.66503328384418
LOC729506	0.508014135333169	5.95452092503147	6.62717625682144	3.15429545114796e-06	0.0180425699805663	4.58684544943248
GAPDHP73	0.623298816151759	5.67872943332607	6.43598804923595	4.60728747736594e-06	0.0194295674342496	4.25151335767138
STX10	0.918827426112597	8.28503046226066	6.30697429843199	5.96599172757701e-06	0.0194295674342496	4.02187493271484
OR14J1	0.658180881318132	5.20479979438319	6.25562494184413	6.61641378514421e-06	0.0194295674342496	3.92972983880932
ADIG	0.622592689605598	6.17153873594698	6.21085020805006	7.2432335869304e-06	0.0194295674342496	3.84903854952041
EEF2K	-1.37804	6.85518745114984	-6.07817	9.48612820095695e-06	0.0194295674342496	3.60806452756358
SLC1A7	-1.06171	5.51875455105081	-6.0593	9.8591498217396e-06	0.0194295674342496	3.57355302043172
AGTRAP	0.821773543457185	8.42933545857167	5.94718	1.24090029826385e-05	0.0194295674342496	3.36743886870063
TEF	-1.67316	6.18617420722309	-5.93755	1.26574472650962e-05	0.0194295674342496	3.34965276678981
IL21R	0.86520824338572	5.48343981746338	5.92643921748223	1.29506420008962e-05	0.0194295674342496	3.32910224809716
RNF183	-2.00917	5.63230629039317	-5.89557	1.38025287904413e-05	0.0194295674342496	3.27190589916566
URB1	0.643222530427701	5.35127583541229	5.86000938742696	1.48554954493171e-05	0.0194295674342496	3.20585534609939
ARID5A	0.839022070303471	7.02003715305789	5.83401497603699	1.5677379707307e-05	0.0194295674342496	3.15744558035601
PDE6B	0.751360589287345	6.35689765334045	5.78942624762567	1.71978632054098e-05	0.0194295674342496	3.07417029243507
LRRC25	0.813197093966042	7.44059271695077	5.78522905658615	1.7348591858146e-05	0.0194295674342496	3.06631613853684
APOA1	0.678430150939694	5.69103197489872	5.77855359620051	1.75911253662119e-05	0.0194295674342496	3.05381900735771
ANXA9	0.837707422281296	5.63822991040116	5.77198770602435	1.78330819982186e-05	0.0194295674342496	3.04152051629945
FRMPD4	0.732391338926292	5.47617428286107	5.68642447245609	2.13182491517926e-05	0.0197936503221834	2.88066894888361
FCGRT	0.789892929375565	9.46676412575289	5.68501809802498	2.13810515960638e-05	0.0197936503221834	2.87801608306417
LOC101928955	-1.16633	4.95681003602595	-5.66984	2.20710316423911e-05	0.0197936503221834	2.84936838592967
SLC30A5	0.695816978840407	6.93337832398437	5.66910779838728	2.21049249539869e-05	0.0197936503221834	2.84798411674924
EDEM2	0.534949682757802	6.66467720704708	5.6581002324593	2.26204409707064e-05	0.0197936503221834	2.82718486048589
PLSCR2	0.617877630298253	5.21992435307957	5.60628039042648	2.52185500042183e-05	0.0205338778248158	2.72903332500775
PRR7	0.835072298925918	5.82297403668876	5.58133930690396	2.65764514113558e-05	0.0205338778248158	2.68165497862393
LRIG2	-0.739724	6.53887839861227	-5.57517	2.69237908542165e-05	0.0205338778248158	2.66992150072356
SCN8A	0.757828302535131	5.14894066040535	5.54118526724133	2.89224214184479e-05	0.0209566438260715	2.60519190063866
DCAF15	0.519188066199188	7.2411485864549	5.53487490063353	2.9309991365135e-05	0.0209566438260715	2.59315468925403
ALAS2	-1.49285	6.21656327657113	-5.48781	3.23740963557381e-05	0.0219675523610091	2.50319965756598
FAHD2A	0.608742231586227	6.60644291296226	5.45468626600466	3.47260320903491e-05	0.0219675523610091	2.4397078047852
TFAP2A-AS1	-0.8342	6.02041284884587	-5.44527	3.54257974627551e-05	0.0219675523610091	2.42163927919377
EDNRB	0.566955871489485	4.24834985010355	5.43198328295223	3.64387148759848e-05	0.0219675523610091	2.39610250040882
BMP5	0.668275180326193	5.32433695811064	5.40017835587578	3.89849086333773e-05	0.0219675523610091	2.3348970602979
MTMR11	0.533647998363132	7.50250670749738	5.35649817023968	4.27822910925268e-05	0.0219675523610091	2.25061656018088
OVGP1	0.554124558723093	6.35692062160527	5.33786749660389	4.45153939747976e-05	0.0219675523610091	2.21459143036502
APOBR	0.731328540899232	8.08946740915077	5.33786544273633	4.45155889486805e-05	0.0219675523610091	2.21458745637855
TF	0.817835749985937	5.84830515853952	5.33063047208147	4.52078650370384e-05	0.0219675523610091	2.20059
AMT	-1.10202	7.0081752178233	-5.3236	4.58913210129792e-05	0.0219675523610091	2.1869685958909
C17orf97	0.575089992288937	4.95625060420057	5.32302213600078	4.59477725937884e-05	0.0219675523610091	2.18585291690164
PAPPA	0.682867932631768	5.22706353707366	5.30935780873708	4.73079242566212e-05	0.0219675523610091	2.15937512304846
AXL	0.502944920382173	6.08248931702176	5.30521852922154	4.77280363609214e-05	0.0219675523610091	2.15134949007303
PRDM12	0.538680021773911	5.1006860768825	5.28874229907658	4.94385105714074e-05	0.0219675523610091	2.11938166432769
OR10J1	-0.991476	6.59989153403982	-5.27653	5.07464752206452e-05	0.0219675523610091	2.09566890124806
RPS6KA2	0.527978242540679	6.42679768889772	5.23979612339781	5.48995993165617e-05	0.0219675523610091	2.02420767099959
BMP7	0.592916199699526	6.22451743611407	5.23824772574835	5.50821037713922e-05	0.0219675523610091	2.02119186826531
EMID1	-1.67672	5.93589113424836	-5.23077	5.59728350376358e-05	0.0219675523610091	2.00661391013212
STXBP2	0.816246816618803	7.01205929040926	5.22255654601377	5.69669767091648e-05	0.0219675523610091	1.99061312481454
DDX46	-0.700023	8.69435532953972	-5.20559	5.90797681075713e-05	0.0219675523610091	1.95750911362096
LOC100507530	0.612808143889923	5.81584555477563	5.19921258735508	5.98940680333337e-05	0.0219675523610091	1.94506332558527
GNB2	0.784979877486398	9.14494009591264	5.19841587085156	5.999664091421e-05	0.0219675523610091	1.94350753069822
SESN2	-1.32021	7.76846847065067	-5.18939	6.11712015219803e-05	0.0219675523610091	1.92587812800036
CCDC150	-0.621709	5.05416032744656	-5.18623	6.15877186754507e-05	0.0219675523610091	1.91970712965254
PDLIM7	0.849536402425598	6.67088835257032	5.17310333921653	6.33507840741475e-05	0.0219675523610091	1.89403715850561
GGT1	0.6268115030144	5.91381925272917	5.17053606559509	6.37015148557705e-05	0.0219675523610091	1.88901529023848
UBE2M	0.733140628410614	7.15291688812818	5.17038511532659	6.37221987976165e-05	0.0219675523610091	1.88871998968095
FCN1	0.814072596403141	10.5201241320316	5.16780736771751	6.40764764417879e-05	0.0219675523610091	1.88367676753083
LOC102723742	-1.01938	4.36119191645298	-5.1558	6.57531209427438e-05	0.0219675523610091	1.86017905293989
PIAS3	-1.46975	6.4207015213892	-5.15424	6.59752192708871e-05	0.0219675523610091	1.85711114709484
RRP15	-0.917433	5.72106167556576	-5.1511	6.6422103001305e-05	0.0219675523610091	1.85096918960678
NCF1	0.724165425216212	11.1570024256524	5.14787368741598	6.68850167038814e-05	0.0219675523610091	1.84465005630563
HAS3	0.695907149979637	5.72363514959891	5.14563347588873	6.72084206849056e-05	0.0219675523610091	1.84026106949208
AK021804	-0.554639	4.51925918788923	-5.13245	6.91443068127538e-05	0.022281996336279	1.81441960347293
PPP4C	0.631961553174458	8.59231274429685	5.11662842369307	7.15429884197951e-05	0.0226736618673241	1.78337984444171
FAM69A	-0.808734	6.24482702548204	-5.11148	7.23416659228436e-05	0.0226736618673241	1.77327378208863
CKB	0.577341442301713	4.90960788969191	5.09720156052258	7.46050213529163e-05	0.0228655768671485	1.74522559609648
ORC5	-1.0133	6.18041400523754	-5.09505	7.49527213739572e-05	0.0228655768671485	1.7409918779195
MAP6D1	-1.71318	5.87811535381643	-5.04358	8.37707396424889e-05	0.024343877717334	1.63968099693426
PCED1B-AS1	-0.815462	5.64104625217573	-5.04356	8.37751771007756e-05	0.024343877717334	1.63963273282217
GABRA5	0.564996930071554	4.28024316913558	5.01921219026681	8.83085089301254e-05	0.0248579090885144	1.59160750603172
ANGPTL2	0.629544130026857	6.11125718375332	5.01601556404588	8.89221345395953e-05	0.0248579090885144	1.58529600198019
LRRC4	0.698759325555682	6.79340422425147	5.01515194830189	8.90886601948505e-05	0.0248579090885144	1.58359065630275
ZWILCH	-0.813299	6.42209046361464	-4.99595	9.28749508635826e-05	0.0252369740766694	1.54564835489949
UBE2O	0.615813616799485	6.51713173207655	4.99436266442917	9.31948532441374e-05	0.0252369740766694	1.54251341494027
ICE2	-0.648922	7.23308435267809	-4.97992	9.61607986932723e-05	0.0252369740766694	1.51394737123298
LOC730961	0.948734077773839	5.02182666476947	4.97417812549862	9.73664973607166e-05	0.0252369740766694	1.50258458169059
S100A13	0.507827085094042	6.11889331023209	4.97132848110714	9.79706105800387e-05	0.0252369740766694	1.49694378816198
MBNL2	-0.702238	6.96595130360568	-4.96605	9.91006366055041e-05	0.0252369740766694	1.48648463978012
CREBZF	-0.622804	8.33164287002385	-4.96525	9.92713141127729e-05	0.0252369740766694	1.48491522306776
ITPKB-IT1	0.952366264815998	6.12204490207848	4.95563038352294	0.000101367779119905	0.0254475398785214	1.46585373133879
RP4-657D16.3	0.881114203319972	6.71201670056943	4.95130835569755	0.000102324023987061	0.0254475398785214	1.45728920034426
ARPC4	0.748434424386938	9.23035367231426	4.93418583600396	0.000106203692062377	0.0261283921977118	1.42333916262593
SPATA25	-0.852224	4.54620410703628	-4.89402	0.000115903947530216	0.0274553713848049	1.34357678146576
GPSM3	0.584443946249245	9.29035247259869	4.89337067260497	0.000116068137062252	0.0274553713848049	1.34228463561618
SLC27A6	0.718625440103311	3.94120837004888	4.89207032291151	0.000116397334979287	0.0274553713848049	1.33969936904839
CCDC159	0.520205632488266	6.76898051746076	4.87558638964765	0.000120653871151011	0.0274658402633187	1.30691175780341
SNORD116-17	0.75550079924889	5.37303987607166	4.86510359588913	0.000123442965599788	0.0274658402633187	1.28604606961823
ZFP3	-0.513123	5.11005380605548	-4.86162	0.0001243853016624	0.0274658402633187	1.27910218503111
GJB5	1.01613333361415	4.35770014683954	4.86011706183312	0.000124792673930282	0.0274658402633187	1.27611653275901
DIS3	-0.555714	6.61619612834953	-4.8594	0.000124989336947721	0.0274658402633187	1.27467864886745
SETD8	0.516224456676051	7.06467970710814	4.85440808436504	0.000126356400376613	0.0274658402633187	1.26474527388243
SSPN	-0.6113	5.44497136661141	-4.85005	0.00012756385635557	0.0274658402633187	1.25606018642504
UNC119	0.72476120715435	7.92825191257186	4.8438644251861	0.000129297056960444	0.0274658402633187	1.24373542437311
PKM	0.625699642644299	7.16609605335739	4.84132059681159	0.000130016917642231	0.0274658402633187	1.23866476188775
MARK2	0.741892501333431	6.49845951281983	4.83840544171616	0.000130846878876824	0.0274658402633187	1.2328531190073
ANAPC1	0.572066830006992	7.50357706206616	4.82789620308208	0.000133883971532865	0.0276121181282647	1.21189480685285
TUBB4B	0.579656632320587	7.99353486867911	4.82229646954946	0.000135531473965023	0.0276121181282647	1.20072286040579
GUSBP1	0.981145324002489	6.3584883657668	4.82134614636576	0.000135813111661638	0.0276121181282647	1.19882657276422
GJA10	1.05734390701934	4.98958519455552	4.81241753496052	0.0001384884721713	0.0276121181282647	1.18100590157636
ANKRD19P	1.45855126063481	6.42255366771398	4.80542847628523	0.000140620064883171	0.0276121181282647	1.16705087047047
CDK15	0.568069163641508	5.59615362828771	4.79987762706863	0.000142336797130744	0.0276121181282647	1.15596406997501
ANKRD55	-1.38988	6.74052249775592	-4.78915	0.000145716257776277	0.0276121181282647	1.13452289770951
ASPDH	0.52567338439475	6.30385916082568	4.78220897330988	0.000147944618995347	0.0276121181282647	1.1206540853682
PRDX5	0.579446696387121	9.03021934439337	4.77581236050523	0.000150029832414806	0.0276121181282647	1.10786327075855
CTD-2534I21.8	-1.21047	5.30658638619043	-4.77085	0.000151668670453925	0.0276121181282647	1.09793415394029
MIR17	-0.798586	4.9204371741369	-4.76063	0.000155101096793602	0.0276121181282647	1.07747998550313
NBEAL2	1.23120760885515	7.5659781778226	4.75915059665351	0.000155602891333157	0.0276121181282647	1.07452756202711
TMCO4	-1.04597	5.89789860794776	-4.75892	0.000155680211474919	0.0276121181282647	1.07407347429794
MEFV	0.69611018711115	6.3525700551921	4.74235787389108	0.00016143301581585	0.0281953236783714	1.04090314772758
ACADVL	0.768448407997981	7.89647480754068	4.73718082538065	0.000163274835597529	0.0282699889311476	1.03053169303795
CLDN5	0.587932672095916	7.1615338559005	4.7342370017839	0.000164331666426688	0.0282699889311476	1.02463306073805
TLR8-AS1	0.569684794372836	4.38769532845882	4.72986386532298	0.000165914478431915	0.0283292781083747	1.01586898223765
CDK5RAP2	0.681884712073156	6.58453675372231	4.72608520364153	0.000167294608370624	0.0283533380705176	1.00829484716014
HNF1A	1.38315278480942	5.99050986944224	4.68963612952522	0.000181221894882512	0.0297258366103492	0.935167543651356
SYNGR2	0.614285040377443	7.95988186738528	4.68243915649736	0.000184108299609046	0.0297258366103492	0.920714210613029
SMAD5	-0.763858	6.74780683658671	-4.67991	0.000185134821311042	0.0297258366103492	0.915628377917018
CHAF1A	0.929578015988298	6.6802870180605	4.67245697134295	0.000188189256955737	0.0297258366103492	0.900659883638506
ARID3B	0.508352528217583	7.04826563727319	4.66995096596618	0.000189228129880123	0.0297258366103492	0.895623913806028
DGKH	-0.615618	5.90218980412999	-4.66622	0.000190784278955573	0.0297258366103492	0.888131727496345
TMEM8A	0.522333030697072	6.50645471269101	4.66020117288403	0.000193325682177367	0.0297258366103492	0.876025899474166
RENBP	0.662774822204789	6.03104394449017	4.65837104983501	0.00019410482075668	0.0297258366103492	0.872346257237193
RHOG	0.596343380929399	9.85424926192908	4.65655546565101	0.000194880921833583	0.0297258366103492	0.868695560688793
C11orf80	-0.693989	5.40771646735194	-4.64403	0.00020032210309675	0.029944604798668	0.84350046177633
HOXB-AS1	-0.562397	5.74698298314261	-4.64047	0.000201895842225419	0.029944604798668	0.836340394345011
LOC101926963	-0.903149	5.88247315286817	-4.63831	0.000202858992298669	0.029944604798668	0.831985715206844
CDK18	0.634038781997341	5.0561439631986	4.62406758688181	0.000209313795644341	0.0305038193907167	0.803322791769611
HBD	-3.14838	9.70349376218443	-4.61376	0.00021411405728636	0.0306410233215224	0.782572395324174
SLC11A1	0.795773569917943	9.94840593142042	4.61172643973504	0.000215076821240604	0.0306410233215224	0.77846645454572
PIGK	-0.644859	6.45808271229738	-4.60928	0.000216240357572173	0.0306410233215224	0.773528646730112
NCAPH2	0.512232808778573	7.33285932395592	4.60778461302563	0.0002169513014898	0.0306410233215224	0.770524563299566
CAPG	0.760061734934943	7.94519185397352	4.60249609936314	0.000219492258564495	0.0306455319694246	0.759867404303183
NRM	0.575749264880088	6.53272508447717	4.60214497081555	0.000219662029850771	0.0306455319694246	0.75915974616356
PRELID1	0.669514307573385	9.64416582977606	4.59062939557761	0.000225304317101716	0.0308669476219372	0.735945928361391
AK094644	0.552107506380137	5.51885555287529	4.58920610152823	0.000226011827309333	0.0308669476219372	0.733076020920615
PYCARD	0.65516534311525	9.27172515192566	4.58793533991126	0.000226645419601637	0.0308669476219372	0.730513540237018
GSTTP1	0.550891423320493	6.07222132357443	4.58046949203148	0.000230404408320467	0.0310512420257727	0.715456113619396
LOC101929529	0.770159848262042	4.9907367660757	4.57127379697133	0.000235121433664342	0.0314595228201178	0.696903787490178
RACGAP1	-0.627286	6.16308768852533	-4.56768	0.000236990461158708	0.0314887010717726	0.689655231560038
WDR36	-0.634379	5.9921719462418	-4.55663	0.000242836411862926	0.0314887010717726	0.667345599902495
PALM3	0.543854863960926	5.99019854725415	4.55245716093728	0.00024508127809186	0.0314887010717726	0.658920603578951
HCN4	-0.900419	5.32071553321828	-4.546	0.000248596390016674	0.0314887010717726	0.645881696504917
ZNF396	0.518384396750611	5.96203246529026	4.54462062162747	0.000249354479304794	0.0314887010717726	0.6430937550524
RNF175	1.05668712569659	7.56299448492417	4.5385473589079	0.000252718089923403	0.0314887010717726	0.630824850611846
MKI67	0.504356623236976	5.72639508437121	4.53348974019298	0.000255554285393208	0.0314887010717726	0.620605579094214
ATP6V0D1	0.583605785818968	10.1940574198097	4.53188805418323	0.000256459185627241	0.0314887010717726	0.617368861145894
LPCAT3	1.08466166517748	5.83984	4.53070864471304	0.000257127589610298	0.0314887010717726	0.614985365297226
AURKB	-0.60704	5.63988494050806	-4.52586	0.000259893770539431	0.0314887010717726	0.605186550887586
MIR6787	1.15472459018804	8.28137066644812	4.52576551460922	0.000259948266346599	0.0314887010717726	0.604994553292262
EVA1B	0.523954326513993	6.20510905450515	4.52555922294543	0.000260066661187132	0.0314887010717726	0.604577567285893
UBXN11	0.782032567856358	5.86120172643815	4.52062324343581	0.000262915876867444	0.0314887010717726	0.594599326883179
PPP1CA	0.575920935328725	9.34813145572727	4.51639032980782	0.000265384451371449	0.0314887010717726	0.586040928880303
RAB31	0.51488465565108	10.2495844047682	4.51290974253606	0.000267431872919139	0.0314887010717726	0.579002654374068
CTSD	0.82696600458621	6.12648021153523	4.50702842503068	0.000270927951384689	0.0314887010717726	0.567107738167314
SOD2	0.966595784458473	10.936133078686	4.50540747554882	0.000271899622541339	0.0314887010717726	0.563828941322266
LINC00269	0.514797659517689	5.01009700495645	4.49818839740252	0.000276270138238679	0.0314887010717726	0.54922416355004
ATG13	0.512529121272151	6.75652245000981	4.49357716697944	0.000279099023441182	0.0314887010717726	0.539893324648681
CABLES1	0.855223810553756	5.39322196861434	4.49201755959851	0.000280062434662187	0.0314887010717726	0.536737112904646
STAB1	0.590627467296593	6.83585565266198	4.48959269034561	0.000281567037821938	0.0314887010717726	0.531829510320003
UNC13D	0.713207855918233	5.77786388026107	4.48609864074603	0.000283749469428735	0.0314887010717726	0.524757305361891
ADAMTS3	-0.877647	3.2793703789293	-4.48602	0.000283799647660199	0.0314887010717726	0.524595340773166
ZNF528	0.718625596774102	5.76348227543214	4.48129068364043	0.000286780631621522	0.0314887010717726	0.515024260129268
KIAA2013	0.504855509868932	7.82982505447366	4.48117329300552	0.000286855049020735	0.0314887010717726	0.514786598831218
RP6-91H8.2	0.51022315940899	5.38484372268358	4.47644	0.000289870109606223	0.0314887010717726	0.505208988187446
NR1H2	0.590022026248151	5.85840318221868	4.47264056684491	0.000292316915407016	0.0314887010717726	0.497509249367315
C19orf44	0.528208942940734	5.99001261592597	4.46174663455062	0.000299443606070768	0.0314887010717726	0.475443587711934
UGDH	-0.742317	5.86005445678803	-4.46103	0.00029991599006743	0.0314887010717726	0.473999559989454
MTO1	-0.583706	7.18883858134995	-4.45933	0.000301046631154575	0.0314887010717726	0.470552503847812
ZBED1	0.765436389953763	7.12409690411264	4.45724713173086	0.000302438243469557	0.0314887010717726	0.466327495420916
GML	0.514411906234959	4.3389194047069	4.45044094669936	0.000307025826389239	0.0314887010717726	0.452535434200402
ZBTB26	-0.520347	5.76678561246842	-4.44809	0.000308626463654863	0.0314887010717726	0.447771629279972
PRAM1	0.699292779021538	7.48275966203654	4.44718583012853	0.000309244720935443	0.0314887010717726	0.445938172511713
LOC101927363	0.56056279356349	2.60502443844647	4.44700639181666	0.000309367508601225	0.0314887010717726	0.445574478043127
KIAA1279	-0.527394	5.90590512149555	-4.44346	0.000311807387554038	0.0314887010717726	0.43837731676486
C10orf53	1.15430528067503	5.1478881296363	4.44181264522327	0.000312943003144168	0.0314887010717726	0.435046615528631
AC009120.6	0.583273928222317	7.03915944068136	4.44144947353281	0.000313194578257551	0.0314887010717726	0.434310390567932
AK025117	-0.577121	5.07254492746811	-4.43635	0.000316752019078293	0.0314887010717726	0.423962372515537
TRHR	0.544834078600921	4.86400117372736	4.43475207583023	0.000317870853708412	0.0314887010717726	0.420731821956345
ZNF492	-1.14008	2.96016610262687	-4.42737	0.000323106612550372	0.0315611962708063	0.405763190620045
NHLRC2	-0.671753	4.78914921509329	-4.42416	0.000325409845990581	0.0315611962708063	0.399254920292908
SEH1L	-0.548716	6.27412838440527	-4.41706	0.000330567835351726	0.0315611962708063	0.384845122719246
RP1-179N16.6	0.516193994697257	6.01745701879215	4.41535970441187	0.000331813527824517	0.0315611962708063	0.381398689593344
ERRFI1	-0.650695	5.82526866754919	-4.41522	0.000331919300951736	0.0315611962708063	0.381106644081802
ANLN	1.00898134929458	4.26158999239924	4.41450658352111	0.000332440922258056	0.0315611962708063	0.37966777545653
ACRV1	0.544882949842257	5.86293387925561	4.40898731567949	0.000336528956519494	0.0317438657729317	0.368468523636941
ALDH1L2	0.616879587670091	4.22082032885955	4.40315440325455	0.000340904601196359	0.0318292740305337	0.356630796381729
MAPK3	0.586420093384551	7.79041110923259	4.4014152726793	0.000342220341412206	0.0318292740305337	0.3531008758871
BRI3	0.536517513131477	9.8227952052362	4.39098555043334	0.00035021944569758	0.03202284247175	0.331927761356955
C2orf81	0.628018343169421	6.15345116911765	4.39094099345902	0.000350254021406887	0.03202284247175	0.331837293267214
FECH	-0.579808	6.35721469895332	-4.3868	0.000353484527632997	0.03202284247175	0.323423686604745
ZNF711	-0.596738	3.95753509310347	-4.38454	0.000355260296810824	0.03202284247175	0.318831459516943
CLIC5	0.664201543474317	5.87469759403369	4.38394715370856	0.000355724187182148	0.03202284247175	0.317635590144058
LOC101929897	0.519944190777424	6.89896868494573	4.38314034502846	0.000356360758313454	0.03202284247175	0.315997095707782
RP11-53O19.3	-0.82913	5.67398357684809	-4.373	0.000364462549770255	0.0324122399248983	0.29539506176167
LOC102724788	0.579784942636494	4.67184421452548	4.36334	0.000372350767719754	0.0324865854864995	0.275770726663827
DTWD2	0.617320596986458	6.70892212384887	4.36155757560897	0.000373823876208735	0.0324865854864995	0.272151952523963
LIG3	0.718879549147541	8.1659460226722	4.36032703603029	0.000374845217151917	0.0324865854864995	0.269651317569816
DEFA6	0.59707395502538	4.88320137237576	4.34634639931811	0.000386649055061358	0.0331330725835351	0.241234658256475
ARRDC1	0.530665827340299	7.21427787038853	4.34136969313989	0.000390940958336074	0.0332517811402579	0.231116525540968
LRRC58	-0.57221	6.94478084891944	-4.33488	0.000396607648876487	0.0336088259492371	0.21792590844228
BC032899	0.87747065895665	5.67164654369919	4.33291247217178	0.000398345171144532	0.0336315037482912	0.213919072571715
TTC27	0.575069969822054	6.20390765665378	4.31368687205875	0.000415708526878208	0.0338711658433173	0.174810357480582
EHBP1L1	0.678321670634161	7.28840373247287	4.30619566873015	0.000422679327241541	0.0338711658433173	0.159566564562948
MIR6789	0.681557102995922	7.46158389593477	4.3059467996722	0.000422912922957827	0.0338711658433173	0.159060093876357
BC017398	-0.820115	2.95595624852906	-4.30534	0.000423486962606285	0.0338711658433173	0.157816675341171
CYLC2	-0.676793	3.46584217686718	-4.29778	0.000430648480701919	0.0338711658433173	0.142444169099693
DRP2	0.600163265324841	5.92890797250778	4.29769282954156	0.000430734646465027	0.0338711658433173	0.142260769112909
ACAP1	0.704681880289584	7.27483438650641	4.29497724528631	0.000433339825938142	0.0338711658433173	0.13673299324123
CSN1S1	1.06398409846071	4.31736202034732	4.29487031864605	0.000433442730284361	0.0338711658433173	0.13651532858684
AC083949.1	1.02768135705412	6.68837959002871	4.29415055640911	0.000434136059280345	0.0338711658433173	0.135050133735716
CTD-2292M16.8	-0.740208	5.88146421260847	-4.29149	0.00043671302114417	0.0338711658433173	0.129624715201479
LOC100101148	0.522980558848359	5.11724427729054	4.28570323438566	0.000442357325576262	0.0340778976740231	0.117852325499009
IGIP	-0.716358	6.80330590538329	-4.2781	0.000449889627852846	0.0341859969755938	0.102373696998696
PAK7	0.508549318182841	6.05020281982326	4.27119299989489	0.000456847834102819	0.0341859969755938	0.0883031273924431
RAD9A	-0.551075	6.81629124324081	-4.26772	0.000460389383583118	0.0341859969755938	0.0812235609055234
DBNL	1.00144749882139	7.55360797427388	4.26640777076206	0.000461730859608553	0.0341859969755938	0.078556143572043
RP11-124L9.5	-0.64649	5.12730734763207	-4.26566	0.000462500159956959	0.0341859969755938	0.0770299422363294
RRN3	-0.562454	7.05151864789421	-4.26428	0.000463918910021724	0.0341859969755938	0.0742219483948539
WASH1	0.665568269580781	7.5552134474936	4.26177899892077	0.00046650434074155	0.0341859969755938	0.0691268475073192
SIPA1	0.566820275156941	6.99304189980903	4.26019710130062	0.000468147084529214	0.0341859969755938	0.0659041323756497
LRP12	-0.736972	4.46517304755161	-4.25869	0.00046971759453373	0.0341859969755938	0.0628336703681383
H2AFJ	0.544240626435295	8.63466418354346	4.25779273626872	0.000470655115704197	0.0341859969755938	0.0610056326636617
DNTTIP1	0.537639048293165	8.58602456959746	4.25463283232831	0.000473971889370941	0.0342110817009351	0.0545674527784996
GAFA2	0.601190339704201	6.14000577916445	4.25369230654879	0.000474963653026352	0.0342110817009351	0.0526510827284197
TGFB1	0.668221755837022	8.09587146239566	4.24759982546232	0.000481438941186974	0.0343864509323926	0.0402363920911863
NFKBIA	0.723421630366445	10.0489203937012	4.24441749037254	0.000484856562606151	0.0343864509323926	0.033751081478667
TMEM91	0.703208570618402	7.80577968636984	4.24418466261557	0.000485107563118888	0.0343864509323926	0.0332765823930128
PREPL	-0.696058	7.25516747322702	-4.24249	0.000486941000965699	0.0343864509323926	0.0298180170190392
SPATA5	-0.569582	4.49669074693491	-4.23869	0.000491067283064525	0.0344650902960623	0.0220816248671865
CTPS1	-0.514402	4.83805523862937	-4.22558	0.000505590932221226	0.0350694352709213	-0.00464145
IRS1	-0.588513	4.7580639103533	-4.22539	0.000505809162561365	0.0350694352709213	-0.00503711
CACNB1	0.50831445986528	5.56893110754041	4.22277010439931	0.000508762947380112	0.0351410318815461	-0.0103757
LOC101928173	-0.550292	4.71796584580236	-4.21596	0.000516529879308554	0.0352782198166559	-0.0242671
BEST1	0.62110594650743	7.15305019088539	4.21234490582329	0.000520696640020484	0.0353517481414501	-0.0316337
TSPO	0.635700061981186	9.39289750972782	4.19801469853775	0.000537562319672761	0.0359623244420004	-0.0608612
CDC7	-0.63398	6.24769560812494	-4.19784	0.000537771372748241	0.0359623244420004	-0.0612177
TSSK2	-0.657872	5.43318360324578	-4.19671	0.000539120510647121	0.0359623244420004	-0.0635151
MPP5	-0.766378	5.86648373601596	-4.17996	0.000559596965402765	0.0363835692917253	-0.097695
LIPE-AS1	-0.819389	6.27668121665053	-4.17483	0.000566023172192482	0.0363835692917253	-0.108164
NT5C3B	0.562859323316487	6.66418046601117	4.17453997927836	0.000566388534198427	0.0363835692917253	-0.108756
LOC102723479	0.765096566230911	4.65890402163969	4.17305573678323	0.000568262632092978	0.0363835692917253	-0.111785
GALNT2	0.745072215392371	6.64062261720268	4.17266233072563	0.000568760417641146	0.0363835692917253	-0.112588
LOC643085	0.545458041718928	5.03050895773469	4.17224546566361	0.000569288365665982	0.0363835692917253	-0.113439
CTB-12A17.3	0.787377339484506	6.83428243100546	4.17060489620921	0.000571370899417164	0.0364149475728822	-0.116787
BCL2L12	0.505091613940212	5.88938047237282	4.16807423859039	0.000574598365086745	0.036417757875858	-0.121951
PTPN6	0.631108428261264	9.34534227739852	4.16036393230241	0.000584545309921344	0.0367298860784849	-0.137689
TMEM19	-0.581097	6.76356144562959	-4.15969	0.000585429334433389	0.0367298860784849	-0.139074
KIAA0195	0.642356099263768	6.36352578280011	4.15683539541403	0.000589155078269404	0.0367298860784849	-0.144891
MANEA	-0.840185	5.57050906517883	-4.15169	0.000595942387978446	0.0369242623796612	-0.155394
HDAC5	0.603322795483541	6.8019869881256	4.1468751554954	0.000602365835166402	0.0369242623796612	-0.165224
THEMIS	-1.24107	7.23530002010703	-4.14665	0.000602662152390421	0.0369242623796612	-0.165675
B4GALT6	0.56149720981826	5.75652982407319	4.13782575158204	0.00061462691518738	0.0374304153801255	-0.183701
CTD-3025N20.3	-0.716316	4.26682565314973	-4.13747	0.00061511521778528	0.0374304153801255	-0.184429
RARA-AS1	0.624848426515785	7.82169677577224	4.1352838641136	0.000618115905140928	0.0375132411395873	-0.188891
BC040624	0.682892786493613	5.11844912676584	4.1294409881168	0.000626211584726322	0.0376055670827775	-0.200822
NCBP1	-0.527922	5.74996	-4.1249	0.00063258307483742	0.0378351598720661	-0.210105
LOC100506473	0.649429874301235	5.13048861196553	4.12082453678431	0.000638345349508907	0.0378351598720661	-0.218419
CDKN2D	0.637431101918935	8.5691225971576	4.11981440198251	0.000639783235858875	0.0378351598720661	-0.220482
CYBA	0.534551356005279	11.5841132761715	4.1195435255832	0.000640169371325931	0.0378351598720661	-0.221036
TMEM97	0.65552436901335	6.36271022737667	4.11713849664098	0.000643608049484215	0.0378351598720661	-0.225948
ADARB2-AS1	0.670877414123098	6.89380115296672	4.11339335985493	0.000648999833258761	0.0378351598720661	-0.233597
STARD10	0.875166213752166	5.83395337037289	4.11228398592355	0.000650605679088812	0.0378351598720661	-0.235863
CMYA5	0.580188263575504	6.35434359511381	4.11062161914121	0.000653019481003012	0.0378351598720661	-0.239259
CST3	0.777341098788291	8.99906942574876	4.10864701409868	0.000655898369655194	0.0378351598720661	-0.243292
NTRK2	1.02390436826975	5.71474542040088	4.10607697746417	0.00065966450191884	0.0379224216178469	-0.248542
PDX1	0.656751572255256	6.02334598514412	4.09916143340508	0.000669906903599725	0.0379842919289978	-0.262669
ZNF467	0.703767611658615	7.58143248795877	4.09760104660367	0.000672239972944365	0.0379842919289978	-0.265857
ROPN1L	0.591838654625283	7.13166790738733	4.09712814680097	0.000672948658534219	0.0379842919289978	-0.266823
RCVRN	0.515839453714372	4.13536897619554	4.09269015250506	0.000679636135764923	0.0379842919289978	-0.27589
MFSD9	0.828773580876979	5.60404402890628	4.09249	0.000679940968530718	0.0379842919289978	-0.276301
ZNF821	0.678580809326352	6.54583065608643	4.09141148066183	0.00068157529897769	0.0379842919289978	-0.278502
COL5A1	0.627114630151999	5.15356394791684	4.09030745521044	0.000683254078014246	0.0379842919289978	-0.280758
NFYB	-0.78104	6.40064834203759	-4.08966	0.000684245686833754	0.0379842919289978	-0.282088
ADCYAP1	0.514427869340488	5.6989126314885	4.08865806542807	0.000685769885824494	0.0379842919289978	-0.284128
NEUROG3	-1.53099	4.8676443298108	-4.08657	0.000688963336998868	0.0379842919289978	-0.288388
LOC100506371	0.518900459783131	4.67178184688374	4.07595270110797	0.000705464121557959	0.0383808338090671	-0.310089
ZBTB7B	0.542419953655559	6.02879057477695	4.07463966829578	0.00070753155975454	0.0383808338090671	-0.312772
TMEM200B	0.928532636401581	8.54465700692675	4.07297083916328	0.000710168009024281	0.0383808338090671	-0.316182
SHROOM1	0.503726143655138	5.73408338530198	4.07200494022275	0.000711698464448049	0.0383808338090671	-0.318156
GFM1	-0.589367	6.65886221004129	-4.07083	0.000713562634831694	0.0383808338090671	-0.320555
PERP	-0.551332	6.45278970905825	-4.07014	0.000714662763611068	0.0383808338090671	-0.321967
LOC100506860	0.606954734124609	5.14853481292904	4.06652373010709	0.000720446369928262	0.038423806396174	-0.329358
HIST2H2AA3	0.695637630210868	10.5835621370645	4.06477463598018	0.000723260571585345	0.0384574730249744	-0.332932
ZSCAN1	0.56489734388776	5.52862978052057	4.06189723973498	0.000727914207931151	0.0384604647143165	-0.338813
ZNF385C	0.999241098482473	4.79819666751261	4.06007445262436	0.000730877772007836	0.0384604647143165	-0.342538
MED15	0.574467880044486	7.88607641252937	4.05116735341587	0.00074553460189447	0.0390339397971292	-0.360743
ZDHHC18	0.734493175042838	8.91003914944664	4.03914408127314	0.000765788608618628	0.0395198934231767	-0.385319
HBG1	-1.58696	11.4778164318907	-4.03772	0.000768222758896057	0.0395198934231767	-0.388229
TECTA	0.571882664950428	4.91591130404916	4.02969224913982	0.000782098139905892	0.0398539096682557	-0.404641
IL7	-0.719573	3.88442450500434	-4.02372	0.000792587571417124	0.0400709091962438	-0.416855
PEPD	0.640511867145718	6.29129970242181	4.02145401461287	0.000796597817659531	0.0400709091962438	-0.421483
FUT7	0.849950979705636	6.27201813626405	4.02048233679397	0.000798325714385079	0.0400709091962438	-0.423469
TRIM3	-0.624492	5.28842508526729	-4.02032	0.000798616022442621	0.0400709091962438	-0.423802
ARAP1	0.787081104005466	8.43291112286845	4.01871554160561	0.000801477184042135	0.0401264725839914	-0.427081
SHKBP1	0.964893862662991	7.15397929718543	4.01280470900671	0.000812111525029222	0.0403937210710187	-0.439166
GP1BB	1.05903100154228	7.97001417675783	4.00721	0.000822310009482832	0.0407239242791498	-0.450607
PACRGL	-0.502824	5.48665897322863	-4.00422	0.000827802688810227	0.0407831583880525	-0.456711
SRL	0.531389979420227	5.98825444565317	4.00415266628756	0.000827933573171569	0.0407831583880525	-0.456856
PRB4	0.513726682191375	6.02408618586673	4.00269149176319	0.00083063600563079	0.0407831583880525	-0.459843
KCNJ6	0.858206591601421	4.77035818584071	4.00126420034536	0.00083328431792923	0.0408255785743485	-0.462761
DLC1	0.606830195600912	4.87689176134238	3.99158498248812	0.000851468867072755	0.0413603714486665	-0.482553
TRAPPC1	0.529389393584811	7.92819485908981	3.98998751666036	0.000854508109609107	0.0413603714486665	-0.485819
CFP	0.664955673560289	9.37987196606816	3.98970531450513	0.000855046140525317	0.0413603714486665	-0.486396
RASD1	0.539210484916113	6.61574686747026	3.98209956827278	0.000869675543473876	0.041368988886345	-0.501948
SULT1E1	-0.846754	4.8101526102942	-3.98123	0.000871355633714266	0.041368988886345	-0.503718
GOLT1B	-0.517289	8.11523031003537	-3.98031	0.000873152000096733	0.041368988886345	-0.505606
TTK	-0.502523	3.13718050795001	-3.97959	0.000874566045948357	0.041368988886345	-0.507089
ACTL9	0.52465297442665	3.98906439050204	3.97930521899949	0.000875113226441912	0.041368988886345	-0.507662
RP11-490G2.2	0.501629274297591	5.37777432112428	3.97487510367928	0.000883804012691809	0.0416078926139683	-0.516722
GAS1	0.556976431533414	4.2040417868893	3.96738224615134	0.00089870059823467	0.0417979779109377	-0.532044
SLC5A12	-0.888195	3.76242409229752	-3.96606	0.000901355852783266	0.0417979779109377	-0.534748
EFNB1	1.19864455267864	5.18598493276541	3.96426245574479	0.000904977067790267	0.0417979779109377	-0.538424
CLOCK	0.516423069700935	7.10955456895546	3.96403264561889	0.000905441139628703	0.0417979779109377	-0.538894
CEBPA	0.745625415028446	6.83836675750604	3.96086310831295	0.00091186600228521	0.0417979779109377	-0.545375
RP11-521D12.1	0.768015694416018	5.90196236129702	3.96011918378608	0.000913380597823874	0.0417979779109377	-0.546897
RSPH10B	1.0053433092554	8.32333020075565	3.95921916416371	0.000915216367529754	0.0417979779109377	-0.548737
UTS2R	0.563086826871693	7.09496317796043	3.95877399575622	0.000916125744183117	0.0417979779109377	-0.549647
ZNF554	0.568163331397293	6.68890731000088	3.95488888382177	0.000924100682096271	0.0417979779109377	-0.557592
COPE	0.944872059893513	7.68450100293131	3.95475421622453	0.000924378357645738	0.0417979779109377	-0.557868
TMEM135	-0.702613	5.63957814504343	-3.95217	0.000929715945873164	0.0418204074041284	-0.563146
TRUB1	-0.627332	5.99697401217616	-3.94963	0.000935005061065091	0.0418204074041284	-0.568346
KIAA1430	-0.66332	7.43027467528712	-3.94771	0.00093901437138078	0.0418204074041284	-0.572268
TKT	0.582403375130887	10.8543367109021	3.94768871509319	0.000939064860181706	0.0418204074041284	-0.572317
ODF3B	0.536183092527557	6.49764529930223	3.94476686502348	0.000945206425980781	0.0418304120434048	-0.578292
TTR	0.659543479770608	5.78399390042362	3.93827781647977	0.000958990397914543	0.0420440428523023	-0.591563
AP000696.2	0.796455874250381	5.24982744933756	3.93816976950607	0.000959221607032421	0.0420440428523023	-0.591784
C15orf37	0.733503726269049	7.20474278537388	3.93328967491444	0.000969722935416179	0.0423421006914545	-0.601764
RP5-935K16.1	-0.507763	5.19520613072764	-3.9275	0.000982338916543616	0.042540761830102	-0.613611
GSTM5	1.15327842791478	5.9049103485957	3.92524422075475	0.000987287785480078	0.042540761830102	-0.618217
TNIK	-0.564989	6.17717603537389	-3.91796	0.00100346847340642	0.0428824527762968	-0.633117
ACTBP9	0.595336352198963	8.28321292722211	3.91736780361322	0.00100479229340035	0.0428824527762968	-0.634325
LOC339685	-0.564259	5.57990088716936	-3.91073	0.00101979202575153	0.0431525801120134	-0.647906
KCTD17	0.95364283229443	6.40396525258621	3.90342013740616	0.00103655552655628	0.0434366125414061	-0.662848
CD37	0.579150415936807	9.24504085935104	3.89945416288875	0.00104576951832474	0.0435305971560632	-0.670959
ZNF732	0.540312168892022	3.22213382071065	3.89836632573151	0.0010483111465468	0.0435305971560632	-0.673183
SMC2	-0.550169	4.85740532067667	-3.89534	0.00105542457857823	0.0436674762348461	-0.679381
THRA	0.541892083002668	5.3167937628529	3.89442639729174	0.00105756827983193	0.043677188163456	-0.681241
CD14	0.628428591403512	10.4518858965231	3.88900283843651	0.00107044529677559	0.0440718308759621	-0.692332
RPIA	-0.546699	7.78462255735962	-3.87863	0.00109550346806554	0.0445206382759138	-0.713536
ENDOV	0.525139626386358	7.76970845310486	3.87184515716997	0.0011122248266469	0.0447235571769439	-0.727417
ABCB9	-0.984516	5.94845202343465	-3.86384	0.00113226379504041	0.0450688391511995	-0.743779
SLC25A16	0.662278109125566	9.79350187928044	3.86365295811971	0.00113274470151085	0.0450688391511995	-0.744168
DLGAP1	0.505230488296257	5.25285956829354	3.86317001795329	0.00113396612537223	0.0450688391511995	-0.745156
MAGI1	-0.565586	5.65678391265212	-3.85125	0.00116453238301116	0.0456188366666812	-0.769527
HIC2	0.546945370357743	5.61239798963701	3.84921389473532	0.00116983789457341	0.0456224158069051	-0.773691
ARHGEF28	0.708803488938989	5.29138717283346	3.84510351454476	0.00118061762541135	0.0457442264471601	-0.782095
SLC12A9	1.00162955967959	7.20941154623031	3.84454685912837	0.00118208510435427	0.0457442264471601	-0.783233
KRT12	0.541270421920847	2.6589215279002	3.83653558487894	0.00120340785291048	0.0461205555688306	-0.799612
ABCE1	-0.503206	7.04606250845624	-3.83535	0.00120659606286821	0.0461314981031255	-0.802036
AMER2	0.560656181055032	5.67891201546982	3.83269177896203	0.00121377455673433	0.0461314981031255	-0.80747
C19orf43	0.604695598682834	9.48398916859391	3.83147720894981	0.00121706875988706	0.0461799887665271	-0.809954
CORO1A	0.606052562703249	11.1736895257162	3.82298533863479	0.00124035169940325	0.0467629699683295	-0.827313
RASGRP4	0.586580824351946	7.17756188072312	3.81490311393215	0.00126292470316497	0.0469352941793956	-0.843834
RTKN2	-0.523319	3.63608127567547	-3.81455	0.00126392416910019	0.0469352941793956	-0.844559
ZYX	0.605392569697562	9.49802507506772	3.81144298122373	0.00127271360011648	0.0470286444831464	-0.850907
LOC101928207	0.519185244825802	4.90512774130684	3.81021121671493	0.0012762165885641	0.0470286444831464	-0.853425
ZNF420	-0.560085	6.1112590577464	-3.80789	0.00128285261162231	0.0471134313867069	-0.858175
COBL	0.533308428471119	5.1130084500942	3.80511490162733	0.00129081252962887	0.0471199235447446	-0.863841
AVPR1A	0.504899209388305	5.5617776569391	3.80467607033934	0.00129207711973625	0.0471199235447446	-0.864738
ELANE	0.764117169854854	4.81614286346204	3.80400408333113	0.00129401599841005	0.0471199235447446	-0.866112
COG6	-0.754652	5.98874723417842	-3.8038	0.00129459343287733	0.0471199235447446	-0.86652
MTRR	-0.530521	7.52973160766639	-3.80123	0.00130204686725311	0.0471398487645217	-0.871779
TUBA4A	0.510567460267843	9.6344228659067	3.80028645508852	0.0013047950612775	0.0471398487645217	-0.87371
ADAM1A	-0.575084	4.70679936572356	-3.79925	0.00130782935234601	0.0471398487645217	-0.875837
HGS	0.514397503948634	6.77145428135339	3.79427798687191	0.0013224061697935	0.0472760205701175	-0.88599
TMEM68	-0.521033	5.20561219284668	-3.78678	0.00134470506077261	0.0476203360912738	-0.901305
ZRANB2	-0.507741	8.64637178848447	-3.78437	0.00135197984502641	0.0476203360912738	-0.906246
PGD	0.699617413961352	9.33496627123616	3.78201952695934	0.00135907570809591	0.0476203360912738	-0.91104
COG5	0.804960449057238	7.67354208769538	3.78187646711437	0.00135950959020055	0.0476203360912738	-0.911333
CEACAM21	0.586114284878855	6.59717745997632	3.78161558888974	0.00136030115625309	0.0476203360912738	-0.911866
HBB	-1.13054	13.0410225391441	-3.77921	0.00136760981890426	0.0476861636470626	-0.916773
RALY	0.522388911627633	7.32596795940866	3.77737299015178	0.00137323896132525	0.0476861636470626	-0.920535
SLC15A3	0.667908020296954	7.16650004206765	3.77591767934486	0.0013777051605543	0.0476881907314409	-0.923508
LOC100130502	0.577255968988267	5.49178889937751	3.77389814260839	0.00138392693603521	0.0478311907801896	-0.927635
FIGNL1	-0.678685	5.5593587326239	-3.77315	0.00138624793137891	0.0478391442985663	-0.929169
LOC101928045	0.58081523604231	5.2749614137812	3.77121157494214	0.00139224717623409	0.0479016772815578	-0.933124
CPOX	-0.565122	6.43111291625723	-3.76727	0.0014045328103559	0.048107351348717	-0.941169
C17orf62	0.524675177284966	7.75432919465923	3.76254134208099	0.00141944065338963	0.0484728390291863	-0.950837
RP11-307L14.1	0.62905244047414	4.74384743932049	3.76132216007742	0.00142330677725458	0.0485324278145825	-0.953328
ASUN	-0.592645	7.27318582501019	-3.75962	0.00142872858477368	0.0486448065768182	-0.956809
ARRB2	0.520975006182251	9.38159918343969	3.75092361797117	0.00145671114033999	0.0492312420841638	-0.974569
DKFZp564H213	0.534485797245754	5.5190795579048	3.74971583756574	0.00146064136010692	0.0492912600578854	-0.977036
F3	0.84800360424063	4.97803700207839	3.74467541212173	0.00147715780244778	0.0495562617595385	-0.987331
MCEMP1	0.772894392707937	8.17185096688221	3.74227909234181	0.00148507523608899	0.0495894657906803	-0.992226
BRCA1	0.598320355786418	5.54390345227386	3.74171663325317	0.00148693972214362	0.0495894657906803	-0.993374
IGFL2	0.551824587651799	5.17555805606524	3.73354284038693	0.0015142997585634	0.0500462178048417	-1.01007
CTC-444N24.11	-0.641631	7.01259055166932	-3.72938	0.00152842763159912	0.0502649238228199	-1.01857
UQCRC1	0.590846096409178	8.18285122530415	3.7260532401667	0.00153980993423519	0.0504739989904028	-1.02536
CCDC91	-0.508569	7.06683420212463	-3.72109	0.00155694702593832	0.0509058302990197	-1.03549
IQCK	0.6079803920234	4.1385521095036	3.71982436012462	0.00156135189480232	0.0509058302990197	-1.03808
GLS	-0.538032	8.91035105504151	-3.71637	0.0015734394625758	0.0509919191271025	-1.04514
GPR68	-0.740937	6.67648649225284	-3.71321	0.00158455688312891	0.0512795777736767	-1.05158
WASF2	0.847049309629286	9.10086502404428	3.71003051504067	0.00159583177260558	0.0514183313890633	-1.05807
RP1-151F17.2	-0.502665	5.19277007902643	-3.70758	0.00160457555121465	0.0514183313890633	-1.06307
FAM216B	-0.563798	2.67694935144271	-3.70508	0.0016135543419372	0.0515282298239129	-1.06818
HSF4	-0.570662	6.52478045326309	-3.70412	0.00161701350583783	0.0515282298239129	-1.07014
RHOU	-0.501273	7.0245970943272	-3.69536	0.00164889587727618	0.0519146198949346	-1.08801
ACSL6	-0.553426	5.23677492139551	-3.69485	0.00165079384725634	0.0519146198949346	-1.08906
LARP1B	0.883268170439207	6.9068006220893	3.69456532976795	0.00165182881483883	0.0519146198949346	-1.08964
CHST3	0.502455101601781	5.4901251018484	3.68884306102281	0.0016730405648027	0.0523299100308481	-1.10131
PDPK1	0.728822555750104	5.9051974728093	3.68848826915196	0.0016743646276673	0.0523299100308481	-1.10204
ZNF286A	-0.51336	6.49897160681629	-3.68764	0.00167754578496404	0.0523299100308481	-1.10377
RP11-747H7.3	-0.632	6.25921090476569	-3.67547	0.00172367353319399	0.052936443542924	-1.1286
MGST1	0.715284698281242	6.93238037857535	3.67347952477499	0.00173134217765789	0.0530295970881025	-1.13266
TASP1	-0.516574	5.46327159977398	-3.67211	0.0017366220564375	0.0530932604928189	-1.13544
POU3F1	0.695932581598272	6.08783623293896	3.66939117122283	0.00174719442107161	0.0531139806891376	-1.141
SLC2A11	0.734147029858253	5.4541952424181	3.66858248744626	0.00175034709089203	0.0531139806891376	-1.14265
GPR171	-0.796535	7.7633159053489	-3.66317	0.00177157496575756	0.0534039989677641	-1.15368
PCDHB11	0.535211518174142	4.57799738529399	3.65803994906847	0.00179196895663188	0.0538061020049047	-1.16415
PKNOX1	-0.557572	7.05940947305721	-3.65582	0.00180086905236003	0.0540024690930504	-1.16868
TRO	-0.678335	4.92337911655697	-3.64963	0.00182589267233518	0.0540283537023146	-1.1813
C11orf68	0.57953604778468	7.52137422581724	3.64598121196051	0.00184078500106499	0.0540283537023146	-1.18873
TRAPPC5	0.508504397300003	9.53078515915078	3.64306380575435	0.00185279251856899	0.0541090133354195	-1.19468
CCDC71L	1.0601729097602	7.55520876047782	3.64221683958497	0.0018562930422722	0.0541090133354195	-1.19641
LOC101929304	-0.80864	5.70523828049789	-3.64204	0.00185702030584523	0.0541090133354195	-1.19677
ZNF770	-0.59856	6.64481995692999	-3.64185	0.00185780739578655	0.0541090133354195	-1.19715
FANCE	-0.652021	5.53135862269092	-3.64128	0.00186017605054442	0.0541090133354195	-1.19832
CENPBD1P1	0.540497633360594	7.15942805409703	3.64068869455742	0.00186262553117996	0.0541090133354195	-1.19952
LILRA6	0.663149319865838	8.66435162651082	3.63799253746173	0.00187385056957141	0.0541334608987296	-1.20502
LOC100287728	0.711869747743552	4.77637879614769	3.63676047345312	0.00187900244257108	0.0542138409659853	-1.20753
LINC00528	0.715196137943229	7.08456821897241	3.6303535917022	0.00190602064308987	0.0545804159122607	-1.22059
SGPP1	-0.609393	7.41536927166247	-3.6295	0.00190964385867672	0.0546158143581542	-1.22232
CRY1	-0.638057	7.09099771730952	-3.62741	0.00191857272645289	0.0548026766307643	-1.22659
LOC100506922	-1.36252	4.8284722363483	-3.6251	0.00192847569542932	0.0549288987538878	-1.2313
DHPS	0.691338010805667	7.13471839474882	3.62469740679542	0.00193019381984816	0.0549288987538878	-1.23211
ZNF614	-0.680956	5.03971956993683	-3.62334	0.00193602325673737	0.0549580795460932	-1.23487
BSG	0.721179601830338	7.40034775684736	3.62195455475088	0.00194202556049468	0.0549609312296687	-1.2377
DMBT1	-1.29502	6.3638175831928	-3.62131	0.00194482679765828	0.0549609312296687	-1.23902
CTSG	0.725747097257252	4.80956830498571	3.61972498610697	0.00195169624643041	0.0550285806208049	-1.24224
RBP2	-0.640285	5.34755638485166	-3.61726	0.00196246073419691	0.0551644208040273	-1.24727
LOC100289061	1.00228508890976	6.39730676547604	3.61613073265484	0.00196738704971117	0.0552316757023208	-1.24957
S100A16	0.526586506292864	7.12629837301345	3.61338764238203	0.0019794463440555	0.055298818500598	-1.25515
FKSG49	0.65995527891751	9.89069541788476	3.61266088828981	0.00198265361855721	0.0553208716982791	-1.25664
SLC35D1	-0.705628	6.43783066090697	-3.61107	0.00198970102130012	0.0553824323203733	-1.25988
CARS2	0.629647014899072	8.9316351795006	3.60400509332838	0.0020212521041936	0.0560560583563026	-1.27426
CHI3L1	1.11192108519787	8.81242414928036	3.60155948359918	0.0020322923144075	0.0561313407308347	-1.27925
SLC22A18AS	0.545171473874585	6.33824002763247	3.59974942222143	0.00204050201333256	0.0561313407308347	-1.28293
ZFP1	-0.711252	5.39086993031765	-3.59971	0.002040701476107	0.0561313407308347	-1.28302
ERBB4	0.617279264557028	5.18428886689046	3.59724470368822	0.00205191673376297	0.0563185761247849	-1.28803
ZMYM1	-0.536792	5.4908788341058	-3.59175	0.00207718792154607	0.0566274080914804	-1.29922
EPS15L1	0.52025152512963	7.10009729836164	3.59137975452125	0.00207889362895812	0.0566274080914804	-1.29997
CDK9	0.541359930974986	6.80503312201133	3.58993118188209	0.00208561064440041	0.0566274080914804	-1.30292
SLC22A4	0.573864507324522	8.19554561069326	3.58976056896593	0.00208640319148243	0.0566274080914804	-1.30327
SLC26A11	-0.610314	7.59827234567137	-3.58295	0.00211828757553116	0.0570864778894616	-1.31713
LARP4	-0.767428	6.78899360784824	-3.57494	0.00215638163775725	0.0576378643363153	-1.33342
OPHN1	0.729099781837794	10.2213904625693	3.56996658431421	0.00218041051151683	0.0580090610505873	-1.34355
ZNF142	0.519491057715258	7.13366367917215	3.56755335394973	0.00219215532737392	0.0581486708430254	-1.34846
PARPBP	-0.655584	4.3988137284935	-3.56452	0.00220702209748165	0.0581486708430254	-1.35464
LPPR2	0.57324782855718	7.25978436581948	3.5642098842106	0.00220853124836491	0.0581486708430254	-1.35526
NPY	0.741207991483807	5.29345026911356	3.56108073917525	0.00222396733430887	0.0584877846080309	-1.36163
S100A1	1.20769474141529	5.50268227060272	3.55507469705381	0.00225389557147524	0.0587079577904802	-1.37384
PSTPIP1	0.579384348931966	7.88368182706152	3.55455467350371	0.00225650557078012	0.0587079577904802	-1.3749
ZNF683	-0.511325	6.45372378948415	-3.55266	0.00226601969189034	0.0587079577904802	-1.37875
GRN	0.502726229303505	9.34022737907976	3.55200148821097	0.0022693635568964	0.0587079577904802	-1.38009
CAPN12	0.637366080097841	6.44341384164971	3.54971771031809	0.00228092633109076	0.0587079577904802	-1.38474
FES	0.570065904029389	6.79379511366778	3.54968516259582	0.00228109154177172	0.0587079577904802	-1.3848
ZNF660	-0.683226	4.0770545038928	-3.5487	0.00228610582446569	0.0587709002963765	-1.38681
CORO2B	0.521871858979474	4.91682648307449	3.54696229638885	0.00229495477529758	0.0588233749182733	-1.39034
ZNF488	0.722944462899217	4.34926130438889	3.54681706378656	0.00229569655626786	0.0588233749182733	-1.39063
RXRG	-0.891565	4.91626575983824	-3.5466	0.00229678812491354	0.0588233749182733	-1.39107
CTD-2528L19.6	-0.660062	5.95673457905557	-3.54188	0.0023210690986857	0.0588233749182733	-1.40068
GMPR2	0.604878442609798	8.27387729976918	3.54073654478642	0.00232696724973795	0.0588233749182733	-1.403
NAALADL1	0.537099056600373	7.01713760846701	3.54042498205129	0.00232858086687122	0.0588233749182733	-1.40363
MIR4755	0.51153907107098	5.31668266704462	3.53999856481886	0.00233079112575492	0.0588233749182733	-1.4045
RNPEP	0.616752187796877	7.82051261592971	3.53793971935654	0.00234149208184583	0.0589365663725332	-1.40868
ANKRD46	-0.621909	6.38145882629047	-3.53305	0.00236711126566164	0.0591513297106299	-1.41862
ABCA7	0.675193764510742	7.65773264757731	3.52961139599571	0.00238527807009407	0.0592516841423654	-1.4256
APOA5	0.618399900729723	5.97162261245464	3.52913537984455	0.00238780508388896	0.0592516841423654	-1.42657
GNAI2	0.849710020212434	9.28391517124174	3.52889230128217	0.00238909653130713	0.0592516841423654	-1.42707
RP11-379F4.6	-0.598746	4.15063547159285	-3.52564	0.00240643531999794	0.0593199824569589	-1.43367
DLAT	-0.584939	5.17595484962762	-3.51917	0.00244131518320497	0.0595503047934295	-1.44681
DAAM2	0.871280886907303	6.41155061454013	3.51748722398354	0.00245047462140548	0.0596455950401674	-1.45024
HIST2H2BE	0.518384262958989	9.10410652269233	3.51580427109785	0.00245966296189987	0.0597421322380775	-1.45365
PRKG2	0.643956581019544	3.39537507717279	3.51133841197496	0.00248421074359036	0.0599807859893945	-1.46272
GSTZ1	-0.7156	6.68817165962303	-3.51103	0.00248593804552301	0.0599807859893945	-1.46336
TMEM161A	0.664130163554209	7.51125402170354	3.51075572185786	0.00248743149566347	0.0599807859893945	-1.46391
MRM1	0.522758154751876	6.42206106096927	3.50924391997625	0.00249580709951562	0.0600839573267813	-1.46698
GAA	0.595252807967302	6.82834631522991	3.50757440387333	0.0025050889137796	0.0602063386000811	-1.47037
RP5-1118D24.2	-0.531632	4.32624866879786	-3.50634	0.00251196160856274	0.0602860061889105	-1.47287
FPR3	0.5896267458183	6.18502163716807	3.49742742768148	0.00256224147874903	0.0604128933395479	-1.49096
DEFB124	0.846464811603481	7.08389789656231	3.49668179294843	0.00256649179746681	0.0604128933395479	-1.49248
G3BP1	-0.527723	8.33660773240905	-3.49471	0.00257778048334322	0.0604919153424542	-1.49648
TMEFF2	1.39981107184678	9.2775614394212	3.49236341305108	0.00259124532336334	0.0605488543170382	-1.50124
SLC45A4	0.700426892019231	7.94621021719004	3.49236162526765	0.00259125561994839	0.0605488543170382	-1.50124
LOC101928790	0.92568701989279	3.64340492400724	3.49190637969928	0.00259387888608057	0.0605488543170382	-1.50217
STK40	0.656171747281295	8.1301603362288	3.49152387020232	0.00259608505616322	0.0605488543170382	-1.50294
SIRPB1	0.941996292437665	7.48993494846132	3.48863845325583	0.00261278699387745	0.060630517469435	-1.5088
RP11-846E15.4	-0.673702	5.20992898037573	-3.48341	0.00264329560152487	0.0610586915325909	-1.5194
RASGRP2	0.539102716289031	9.28181611831197	3.48273340596176	0.00264729991260184	0.0610586915325909	-1.52078
HBA1	-1.14505	12.8643737456684	-3.48099	0.00265757858183195	0.0610744485236191	-1.52432
QSER1	-0.524533	6.70590319722892	-3.48051	0.00266039402116163	0.0610744485236191	-1.52528
AKAP8L	0.596031301846017	5.88418371736301	3.47890153630294	0.00266993675443039	0.0611493022436109	-1.52855
CAPN13	0.746059467225068	6.18342997246553	3.47388074296513	0.00269988722203944	0.0617117079323299	-1.53873
MIR302B	0.65692224350616	8.18412309911573	3.46801535765361	0.00273529697985848	0.0622323325769069	-1.55063
LOC101929681	0.641351826696511	5.5485928971485	3.46740891410769	0.00273898421787348	0.0622323325769069	-1.55185
GBA	0.532457472545257	6.75518821693169	3.4632411512439	0.00276445793530131	0.0624819296716044	-1.5603
IRAK1BP1	-0.687139	3.83815525182898	-3.4613	0.00277640467144794	0.0624819296716044	-1.56424
CYB561D1	0.550170349108567	8.35690582405262	3.45523302832876	0.00281406344981099	0.0628773125255695	-1.57653
TIMP1	0.622425591659701	9.7098512220974	3.45379698721602	0.00282305144330689	0.0629545974881693	-1.57944
GOLGA6L4	-0.908273	5.32560310998857	-3.44787	0.00286043412330043	0.0633628798899699	-1.59144
ZNF382	-0.616523	4.61031460093843	-3.44565	0.00287460265880608	0.0633932165204298	-1.59595
MCM6	-0.565881	7.48652162762869	-3.44317	0.00289045531868443	0.0636512201073144	-1.60097
EME1	0.64093234589659	7.91867819699584	3.4390095642852	0.00291727018732511	0.0639953421725776	-1.60939
TSC2	0.510926809515941	6.00023607536031	3.43837697476778	0.00292136932569504	0.0640238794750025	-1.61067
SNRNP48	0.807409580795073	7.24269168723426	3.4369013884333	0.0029309531574548	0.0641234810659053	-1.61366
ZBTB48	0.630523580836916	5.87769089518251	3.43303565987293	0.00295620831016202	0.0642947206620789	-1.62149
RASGRP1	-0.806028	8.87856290425526	-3.43093	0.00297006741928415	0.06439898555011	-1.62576
TMEM120A	0.670501250410423	7.62171197954712	3.42727724390691	0.00299422762054695	0.0645706673637043	-1.63314
CAND1	-0.550144	6.45498164303119	-3.42672	0.00299793991949799	0.0645706673637043	-1.63427
RP11-414H17.5	0.784931545551983	5.68926291778233	3.42499527046729	0.00300942733930115	0.0646532371109955	-1.63776
PRKXP1	-0.654243	6.21024204354054	-3.4191	0.00304905186219537	0.0651131190707718	-1.64969
LOC439951	0.542579129016845	4.01318094639182	3.41817095899061	0.00305533862925001	0.0651131190707718	-1.65157
TMEM259	0.526554025870599	6.61378648368433	3.40113	0.00317303375433091	0.0666657596869524	-1.68603
AC099684.1	0.54394879181284	4.90003	3.39732739925665	0.00319988934206576	0.0669374002251915	-1.69372
ZNF506	-0.521017	5.76586171455017	-3.39677	0.00320384281958207	0.0669374002251915	-1.69484
CTD-2033C11.1	0.97726403145842	4.7538024275914	3.39640470457924	0.00320644189889903	0.0669374002251915	-1.69558
STRADB	-0.71872	7.13674786054333	-3.39511	0.00321564076465035	0.0670296808865528	-1.69819
PDZK1	-1.41903	4.14650185649361	-3.39459	0.00321933524094783	0.0670296808865528	-1.69924
ZFP14	-0.576988	4.54577758299256	-3.39455	0.00321965119293363	0.0670296808865528	-1.69933
MOCS2	-0.544824	4.59291734150021	-3.39402	0.00322343016744892	0.0670473474829374	-1.7004
PRKCD	0.521209429118043	8.07280028389062	3.39265614110099	0.00323319887801864	0.0670749803942804	-1.70316
LOC100996740	0.580970247680485	9.62940757282677	3.39256516239565	0.0032338510075699	0.0670749803942804	-1.70334
SH3GL1P1	0.718519802530413	2.70251290875185	3.38683909804135	0.00327515715823092	0.0673275793174515	-1.71491
MBNL3	-0.575581	8.06852585490746	-3.38533	0.00328616384861222	0.067432671619953	-1.71797
CLIP4	-0.501975	7.48126684070076	-3.38277	0.00330478979711691	0.0675724669866264	-1.72312
BRMS1L	-0.616459	5.48685433938198	-3.38147	0.00331439683604152	0.0677083925077053	-1.72576
ERCC4	-0.604853	5.12118351310806	-3.38008	0.00332456950449247	0.0678556202165815	-1.72856
ARG2	0.604124081914001	6.1350677021318	3.37831929921405	0.00333758123385794	0.0679153333841064	-1.73212
NDUFS7	0.522942515505151	7.40585989912033	3.37727606624883	0.00334530510156853	0.0679153333841064	-1.73422
SHPRH	-0.548607	5.72908873714253	-3.37617	0.00335350268647312	0.0679636568865825	-1.73645
CTDSPL	0.750225880684836	5.67343269004571	3.37608334640587	0.00335415732837549	0.0679636568865825	-1.73663
PACRG-AS1	0.548988977502208	5.41440574587917	3.36661839995797	0.00342522851518285	0.0684332141993685	-1.75574
HELLS	-0.752885	5.55430783880502	-3.36632	0.00342753046780046	0.0684332141993685	-1.75635
MAGI3	0.627988068428179	4.80381679984912	3.36499655987991	0.00343755478523716	0.0684519177425815	-1.75901
SLC6A13	0.534233610452751	6.09380258453389	3.36163974333533	0.00346320620378617	0.0686639150282735	-1.76578
IFT80	-0.632308	5.92776152595673	-3.35975	0.00347773337648347	0.0688910218911293	-1.7696
AKAP11	-0.52429	7.42807340658837	-3.35884	0.00348471827979597	0.0688910218911293	-1.77142
HBM	-1.5006	6.55612690975563	-3.35424	0.00352038847206141	0.069436627793763	-1.7807
YPEL3	0.707094246707074	9.52377536849543	3.35222881630373	0.00353613037271179	0.0696870481719602	-1.78476
ZNF29P	0.60142419429422	4.80022570739121	3.35161982995289	0.00354090109866115	0.0696956927184921	-1.78599
ND6	0.559603178964293	10.0464767911983	3.35139534265649	0.00354266130382895	0.0696956927184921	-1.78644
JMJD1C-AS1	0.50432850659418	5.88850136158916	3.34946413555082	0.00355783954039988	0.0698142098493562	-1.79034
SETD6	-0.612389	5.17295433460342	-3.34328	0.00360686560573788	0.0704138951017771	-1.8028
ZNF570	-0.544297	4.88319274528268	-3.34117	0.00362379256306372	0.0705658305262879	-1.80707
RAD50	-0.506678	6.28187801966203	-3.33955	0.00363675975443192	0.0706958905534429	-1.81032
LOC101243545	0.632254542225748	10.8525500165782	3.33842166442896	0.00364586524013988	0.0707926152931551	-1.8126
SLC25A22	-0.580776	6.28221212695678	-3.33692	0.00365803348121148	0.0708345082318977	-1.81563
ZNF552	0.526608153582461	6.89192233698313	3.33444370969673	0.00367809821890016	0.0708345082318977	-1.82061
CNN2P10	0.626729049498666	5.75314879783849	3.33424079083164	0.00367974994880918	0.0708345082318977	-1.82102
ZNF234	-0.622981	5.19580785983792	-3.33408	0.00368104153355447	0.0708345082318977	-1.82134
LINC00939	0.60218711477857	4.5734780342618	3.3298805090519	0.00371541891602564	0.0713759738024069	-1.8298
ANAPC15	0.600923547963498	6.63490750471369	3.32774088392622	0.00373304620263145	0.0713848150074202	-1.83411
MFAP5	0.51718827999764	4.08249885703983	3.32716464331386	0.0037378076070421	0.0713848150074202	-1.83527
LOC101928144	0.542652647030084	6.13051412549787	3.32653497128501	0.00374301734170517	0.0713848150074202	-1.83654
SCAND1	0.521598791504878	7.37978802608008	3.31362432558334	0.00385142531971679	0.07279672039554	-1.86253
SUGP1	0.551387365138708	7.2971626169799	3.31039021957541	0.00387906159304799	0.07279672039554	-1.86904
PABPC1P1	0.590173325328591	4.96440947976371	3.30965776864816	0.00388534761052399	0.07279672039554	-1.87051
GOLGA2P5	0.539959705596448	5.29148410677364	3.30949735994373	0.00388672560167342	0.07279672039554	-1.87084
BMI1	-0.554908	8.12992944024466	-3.3087	0.00389361899826669	0.0728421935244005	-1.87245
CKAP4	0.545556551893014	9.68831257181382	3.30616933196516	0.00391542369314881	0.0730127649006827	-1.87753
RNF182	-1.11695	3.32679219898952	-3.30401	0.00393417202732955	0.0730127649006827	-1.88188
CBLL1	-0.52295	7.24489054339655	-3.30185	0.00395298374130528	0.0732247547898443	-1.88622
FLOT1	0.556931215680471	9.03849781941271	3.3013633349243	0.00395723456184874	0.0732247547898443	-1.8872
SLC39A8	-0.61969	6.15859377054665	-3.2999	0.00397008307786881	0.0732247547898443	-1.89015
LPAR5	-0.630978	6.39753595179957	-3.2989	0.00397882866991846	0.0732247547898443	-1.89215
PDLIM5	1.00974911296162	8.63783594979134	3.29749560737103	0.00399120123112473	0.0732247547898443	-1.89497
PITPNM1	1.16587127455282	6.81542740990939	3.29565159618892	0.00400749620352562	0.0732247547898443	-1.89868
LONRF3	-0.838605	5.05774143288462	-3.28984	0.00405929736152526	0.073540977406596	-1.91036
PTH1R	0.726381702459983	6.17728720798954	3.28976903201395	0.0040599168823271	0.073540977406596	-1.9105
HIST1H1C	0.63401809900785	8.6845375183965	3.28832224962679	0.00407291233855896	0.073540977406596	-1.91341
MAF1	0.50360948572894	6.93901059786462	3.28804281649915	0.00407542700065378	0.073540977406596	-1.91397
COLCA1	0.584076332843033	10.4084118841287	3.28766557061931	0.00407882431507737	0.073540977406596	-1.91473
ZNF431	-0.547163	5.5417840311419	-3.28465	0.00410609471125041	0.073624530071276	-1.92079
PLEKHH1	0.616390012257448	5.33091560372792	3.28446829918622	0.00410772952219232	0.073624530071276	-1.92115
HACE1	-0.5519	5.70371323707454	-3.28324	0.0041188548291623	0.073624530071276	-1.92361
P2RX1	0.610778552560576	7.01553800031853	3.27475226801484	0.00419680864509165	0.0743461898852919	-1.94067
DEF6	0.504635298109807	7.83345802823211	3.27389929099426	0.00420471895592516	0.0743461898852919	-1.94238
WDR12	-0.536804	6.03151246157111	-3.27115	0.00423029192936613	0.0744531379568439	-1.94789
NFKB2	0.558013033435176	6.77580443632761	3.27044	0.00423692578519823	0.0744764020851206	-1.94932
UBE2S	0.510693494642469	6.59412123025293	3.27031449195016	0.00423812392984384	0.0744764020851206	-1.94957
TLN1	0.682486334514458	6.60546436758658	3.26819373470991	0.00425800876472394	0.0745395872508674	-1.95383
DDHD2	-0.549438	5.92962249331913	-3.26539	0.00428440959480115	0.0747881127797688	-1.95945
LINC01355	-0.512104	5.12860149252971	-3.26401	0.00429748313630286	0.0748868348504261	-1.96222
CA14	0.627871435067409	5.11751660414404	3.26343189773005	0.00430299147558435	0.0749257572004338	-1.96339
C7orf49	0.743235100894089	7.35752354708864	3.26187877451206	0.00431776370577795	0.0750663865320625	-1.9665
MAD2L2	0.669613257031265	6.86059439978234	3.25483461555033	0.00438539011677625	0.0757837808699703	-1.98063
ASTN2	0.535696825292164	4.52249290865696	3.25202683593525	0.00441263458413041	0.075946090359173	-1.98626
ZNF749	0.532929472632814	3.6039546634126	3.25136662478518	0.00441906482830869	0.075946090359173	-1.98758
TMEM171	0.775330554704707	5.36209610626055	3.25058278125639	0.00442671115101588	0.075946090359173	-1.98916
RMDN1	0.558945760749507	6.9891724157458	3.25047273269757	0.00442778570345265	0.075946090359173	-1.98938
RAB13	0.573213756148188	6.31790060999815	3.2479120456853	0.00445286152824877	0.0760853864516071	-1.99451
ITGAX	0.537713394267385	9.79191667315927	3.24684437324469	0.00446335794380422	0.0760853864516071	-1.99665
HIST1H2AD	0.518598990736877	7.76833576926262	3.2445518170684	0.00448597842321757	0.0760853864516071	-2.00124
LMAN2	0.550305572388655	7.73581643627935	3.24236749847578	0.00450763553222464	0.0763395270002219	-2.00562
C1orf109	-0.574274	4.09346766017156	-3.23543	0.00457709091724025	0.0770028236665124	-2.01952
AC006129.2	-0.840667	6.68390896050262	-3.23198	0.00461199874986106	0.077191029716392	-2.02642
SH3BGRL3	0.562541854649869	10.9985555629332	3.2311793884012	0.00462018140437918	0.0772167644501064	-2.02803
SLC39A10	-0.557416	6.10578399013154	-3.22669	0.00466606146410104	0.0774816028624787	-2.03701
RP11-115A15.2	0.506349686159875	3.83432031568118	3.22646672285398	0.0046684086256821	0.0774816028624787	-2.03746
D21S2090E	0.746123066648704	4.69704375043951	3.22105167859136	0.00472443311346279	0.0781352636263713	-2.0483
STMN3	-0.565636	8.21866768234508	-3.21992	0.00473621713269206	0.0781851717142816	-2.05056
CASD1	-0.611484	5.9050652165797	-3.21528	0.00478488281734744	0.0785965336622961	-2.05985
NUP214	0.566548999615915	9.78479573127304	3.21021480152467	0.00483853813936114	0.0789012221436474	-2.06998
ATG101	0.588113143050613	7.18542022027614	3.21006496378304	0.00484013460319561	0.0789012221436474	-2.07027
TRIM4	0.506531496892167	7.14963189435687	3.20959789219879	0.00484511438425807	0.0789012221436474	-2.07121
LOC728084	0.525293722981485	4.33417635517871	3.20494579202032	0.00489498845223633	0.0793782493009589	-2.08051
ARL16	-0.691824	6.92968001939441	-3.20454	0.00489930870367743	0.0793782493009589	-2.08131
TAF1A	-0.544258	4.64524002467925	-3.20135	0.0049338294544887	0.0795917284025561	-2.08768
CHD2	0.502996028273032	7.89909009157069	3.19690563872492	0.00498237302796554	0.0801101158677805	-2.09657
SERPINB2	0.682830424970096	5.79477673845452	3.19089668679329	0.00504867698999067	0.0807843711682693	-2.10857
TMEM263	-0.616067	6.31556329410265	-3.19055	0.00505255398346999	0.0807843711682693	-2.10927
CACTIN	0.520011724562965	5.56905400749776	3.1892984468732	0.00506645721396473	0.0808461012130898	-2.11176
TRMT13	-0.551477	6.74779340130924	-3.18599	0.00510345781876416	0.081081520174717	-2.11837
SBNO2	0.542683049954179	7.29542044484976	3.18397122635507	0.00512616560882236	0.0812234550760772	-2.1224
YIPF4	0.995670302611719	6.85824065083951	3.18099951923316	0.00515977164514279	0.0815864376232669	-2.12833
UBALD2	0.544837852867618	9.22517632787724	3.17915095324878	0.00518078511153379	0.0817492161047538	-2.13202
RTP3	0.837789419431845	4.70063355168147	3.17603369293552	0.00521641017966057	0.0818834344256087	-2.13823
RP11-285J16.1	-0.589273	5.3457188646145	-3.17247	0.00525742912275758	0.0821998683766389	-2.14534
GPRIN3	-0.608615	6.31960040009956	-3.17177	0.00526554043073381	0.0821998683766389	-2.14674
DPY19L2P3	0.551253060679929	2.45876552406695	3.17089672956017	0.00527564057058959	0.0822812926074232	-2.14848
NAA30	-0.507686	6.33524429033377	-3.16125	0.00538865488451117	0.0831417356275479	-2.1677
SLAMF1	-0.509277	6.00755640186103	-3.15684	0.0054411431943418	0.0835131214647404	-2.1765
PLAC1	1.00465952119924	5.40605743709636	3.15167179428725	0.00550320137890685	0.0836451620554885	-2.18678
OR51B6	-0.566506	4.94743118047735	-3.15053	0.00551696679962162	0.0836451620554885	-2.18905
UCKL1	-1.26186	5.89839826587032	-3.15021	0.00552083695560098	0.0836451620554885	-2.18968
POLRMT	0.508068762677928	5.76559307882955	3.14935570244941	0.00553125569012037	0.0836451620554885	-2.19139
LOC100506119	0.530145571608481	6.01547150641806	3.14462173319168	0.00558903262923987	0.0841828044422958	-2.20081
RP11-357G3.2	-0.877426	1.72898352065979	-3.14319	0.00560661731758651	0.0841942414573209	-2.20366
TBC1D10C	0.643293751244071	8.3670551998632	3.14287420234709	0.00561050947657732	0.0841942414573209	-2.20429
KBTBD6	-0.624656	5.18600567859235	-3.14273	0.00561224106731554	0.0841942414573209	-2.20457
PASK	-0.641112	6.37725864728417	-3.14154	0.00562698562154729	0.0841942414573209	-2.20695
CXCR3	-0.811351	7.22999121565651	-3.14006	0.00564525977160088	0.0841949032834307	-2.20989
PNO1	0.670028467487288	8.02612203224058	3.13002438964362	0.00577092607342375	0.0856838342374662	-2.22984
AK055910	-0.502788	5.78849687635004	-3.12926	0.00578058731152034	0.0857716197714562	-2.23136
SLC9C2	0.594466910972613	4.14131975309508	3.12784119357389	0.00579862253928076	0.0858721577338147	-2.23418
TBC1D22B	0.562415994619278	5.97273894846051	3.12574968867835	0.00582527748018557	0.085977331434212	-2.23834
KLHL23	0.746668299909382	4.56170817965623	3.12522142481901	0.00583202877560739	0.085977331434212	-2.23939
HDAC7	0.71952105880412	6.78387127817864	3.12290186448735	0.00586176363011727	0.0862421208893427	-2.244
SACS	-0.692132	6.45467487764683	-3.11918	0.00590972767451413	0.0865962534555269	-2.25138
CFH	-0.844413	4.77206926578014	-3.10765	0.00606097821442613	0.0874370627654917	-2.27427
ITGA5	0.604109885738185	6.78564288235593	3.10670613595441	0.00607354196224894	0.0875631002496886	-2.27615
RPL34-AS1	0.514120990753524	5.02257124848912	3.10175358699763	0.0061397796659818	0.0880740807258079	-2.28597
SDCCAG8	-0.843973	6.13517804829781	-3.09623	0.00621442977997491	0.088690913449188	-2.29691
TC2N	-0.661886	6.84260553038936	-3.09607	0.00621663722965296	0.088690913449188	-2.29724
PIGW	-0.829804	4.84956156774672	-3.08917	0.00631121689138827	0.0895785623293819	-2.31091
UNG	-0.540488	6.81063822385365	-3.08882	0.00631609664268072	0.0895922449997117	-2.31161
HLTF	-0.53808	6.67049443585409	-3.08492	0.00637023274412723	0.090084436799719	-2.31933
ZFP41	0.745276634441635	5.51583214787223	3.08453858588532	0.00637554570245094	0.090084436799719	-2.32009
LOC102724587	0.713279194339396	3.91129348455158	3.08433277694789	0.00637841703234093	0.090084436799719	-2.32049
ESF1	-0.505732	6.55360423055646	-3.08327	0.00639323688408596	0.090084436799719	-2.32259
SMOX	0.573500053626939	6.97077219494661	3.08063917709123	0.0064301627848401	0.0901814148381782	-2.32781
MED25	0.579153025717346	8.66624784866618	3.07912790772782	0.00645145272781658	0.0901814148381782	-2.3308
TRNP1	0.896443563616572	6.22366221624287	3.07892	0.00645444653592999	0.0901814148381782	-2.33122
TMPRSS2	0.901042008204274	6.11016206546807	3.07820687333575	0.00646446142278741	0.0902421460362269	-2.33262
CEP170B	1.18087702126731	6.2755712144964	3.07721634442912	0.0064784801759978	0.090327621222931	-2.33458
CDCA7	-0.714132	5.45609663621913	-3.0757	0.00650001272600702	0.0904624642159614	-2.33758
USP46	0.841587242276299	6.22851432127608	3.07407641726412	0.00652311492294585	0.0904774966213645	-2.34079
SLC24A4	0.896834437925482	6.64787595009253	3.07125637829859	0.00656345758773799	0.0904774966213645	-2.34637
CADM2	-0.993333	3.8140008366056	-3.07027	0.0065776660753356	0.0904972939288506	-2.34833
LA16c-358B7.3	0.812398887789774	5.39357991421876	3.06877346136275	0.00659917854690746	0.0906842072992449	-2.35128
IP6K1	0.710466141564926	7.06005747349986	3.06705911383347	0.0066239527380857	0.0908609344408877	-2.35467
AASDHPPT	-0.575969	7.6138801301218	-3.06561	0.00664492224273442	0.0908950893501623	-2.35753
XPR1	-0.506427	6.6484798157761	-3.06508	0.00665260637828701	0.0909269019923577	-2.35858
FCER2	0.638558500968915	5.63825639389847	3.06410802354152	0.00666681147939637	0.0910123190027381	-2.36051
FLOT2	0.525005778945369	8.63098722981177	3.06287389194193	0.00668481474675955	0.0912036740643163	-2.36295
RP5-930J4.4	0.681350827935318	7.59416640576159	3.06028610257006	0.00672271869820149	0.0914821945537182	-2.36806
RP11-112J3.16	-0.754102	4.61991710813357	-3.05234	0.00684037562185388	0.0920641078604846	-2.38375
KCNB1	0.539182664892413	5.87759592678473	3.05072907609439	0.00686452389966162	0.0920641078604846	-2.38694
UTY	0.617377747767076	6.24351576467023	3.04913344018223	0.00688848144420127	0.0922226187497513	-2.39009
OXT	0.649317733874192	5.80939559801913	3.04830336595964	0.0069009766712648	0.0922798290590261	-2.39173
TXLNG	-0.522008	6.91374432559021	-3.04762	0.00691124729840693	0.0922798290590261	-2.39307
RASSF7	0.511338249053382	7.55250460741875	3.04760012094868	0.00691157997117229	0.0922798290590261	-2.39312
ANKRD12	0.571225254891289	9.97327647218876	3.04378960630649	0.00696930983694828	0.0926576798163142	-2.40064
FUT6	-1.29357	5.95633108878452	-3.03815	0.00705558079513704	0.0932913834659572	-2.41176
CLEC4C	-0.661965	5.23181115977238	-3.03532	0.00709929872517412	0.093596430837635	-2.41734
LINC01089	0.73414611465576	6.67021310069517	3.03388218589903	0.00712161222461449	0.0936451078730916	-2.42018
NAP1L3	-0.605328	4.6267019404865	-3.02922	0.00719434710786572	0.0940671250510995	-2.42936
IMPA2	0.624976068620681	8.65969235957388	3.02600334852753	0.00724503532490414	0.0943462767409258	-2.43571
RP13-30A9.2	-0.505169	3.21095155442768	-3.0224	0.00730219246406016	0.0946059816408247	-2.44281
PAQR3	-0.632006	5.09400235868778	-3.018	0.00737247492891921	0.0950426961131395	-2.45146
PCDHGB8P	0.659908228296679	4.57546409321377	3.01785848667678	0.00737481029952111	0.0950426961131395	-2.45175
TREML4	0.65105549065177	5.01449234248524	3.01771618358086	0.00737709761955083	0.0950426961131395	-2.45203
LINC00963	0.879420132811094	6.19239429153469	3.0176948834645	0.007377440047943	0.0950426961131395	-2.45207
DYRK3	0.521067342930852	5.62987527951304	3.01308974690735	0.00745183756031793	0.0956779143546993	-2.46113
SPRR3	0.600147306480645	4.57962716718191	3.01266218304095	0.00745878185087399	0.0957133644127857	-2.46197
PHKG2	0.551589357090879	6.72827284068738	3.00834436798879	0.0075292628951453	0.0960789375576824	-2.47047
BTAF1	-0.553967	7.05442541622435	-3.00609	0.00756625081529533	0.0962397998173015	-2.47489
ZSWIM3	0.799506627428971	6.37012056788824	3.0036148294203	0.00760720678065415	0.0965887298231781	-2.47977
RBM20	0.553135755345401	4.30373089373869	2.99457227516239	0.00775841636900197	0.0976379150913172	-2.49753
AP1M1	0.853676994412443	7.03066351265586	2.99408467721855	0.00776665233680932	0.0976379150913172	-2.49849
TMEM106B	-0.555922	7.59970512676548	-2.99222	0.00779816626943685	0.0978256904663945	-2.50215
GRAMD1A	0.530811933950179	7.74769053856664	2.98930144534365	0.00784789652230045	0.0978613204350313	-2.50788
DYRK2	-0.632092	6.78133423269056	-2.9891	0.00785128566351441	0.0978613204350313	-2.50827
TARP	-0.936143	10.2177935139788	-2.98753	0.00787817945880425	0.0978613204350313	-2.51136
SLC12A2	-0.661855	5.98667586599809	-2.98748	0.00787899803850778	0.0978613204350313	-2.51145
CRNKL1	-0.572461	7.11279870246384	-2.98004	0.0080075662721831	0.0983807360561495	-2.52606
PLEKHO1	0.517827207134347	8.37286212349057	2.97962509456938	0.00801477986220947	0.0983807360561495	-2.52687
LOC102724229	-0.541944	7.88010346771035	-2.97875	0.00803009456463437	0.0983958744820394	-2.52859
TRPC5OS	-0.524738	2.48963572234042	-2.97862	0.00803226065091384	0.0983958744820394	-2.52884
SLC35F1	0.538496515073905	5.95950789182639	2.97672869602508	0.00806539837830846	0.0985770912904367	-2.53255
QRSL1	-0.574338	6.49646223756661	-2.97441	0.0081061845670959	0.0988477150609193	-2.5371
TUBA4B	0.818325001335173	6.3123781831218	2.97438923483404	0.00810650981312677	0.0988477150609193	-2.53714
TRIM7	1.03525395510114	5.77565786789681	2.97249365184316	0.00813996988523326	0.098964821018362	-2.54085
TGM3	0.513005241168324	5.40858665363376	2.97178253667741	0.00815255670571255	0.098964821018362	-2.54225
LRP1	0.562637978507121	6.40706935469375	2.97146246828463	0.0081582281079889	0.098964821018362	-2.54288
SATB2	-0.5544	4.06257714551276	-2.97104	0.00816569851702438	0.098964821018362	-2.5437
ZNF566	-0.64221	3.55688672768708	-2.97054	0.00817456362073521	0.098964821018362	-2.54468
ZNF354C	0.576398495866919	6.56297235332705	2.96893775575338	0.0082030986123064	0.0990464049865595	-2.54782
CSNK1E	0.916826477293656	6.66403422795147	2.96798259716122	0.00822013647403163	0.0991205136280878	-2.54969
HELQ	1.27932841484494	6.45523057326169	2.96757165714651	0.00822747725849625	0.0991283199970481	-2.5505
ZSCAN5A	0.595847741477497	5.3225265766599	2.96443897196878	0.00828364684351696	0.0994728814777212	-2.55663
ULK1	0.515419651962088	6.76369784753154	2.96316265306223	0.00830663784093783	0.0995781915382395	-2.55913
LRRC56	0.902381463750669	5.39923392720337	2.96194630973328	0.0083286059972654	0.0997233385002601	-2.56152
AMIGO2	-0.571981	6.94967632220531	-2.96192	0.00832916520428308	0.0997233385002601	-2.56158
NUP210P1	0.566247305609184	4.90059566176557	2.96008537482595	0.00836232498023401	0.100052752637068	-2.56516
LRG1	0.542914123527801	8.32056611396689	2.95919949709677	0.00837842296074015	0.100052752637068	-2.56689
PRO2964	-0.661196	3.90090508365402	-2.95727	0.00841364191193182	0.100194090869179	-2.57067
TBC1D31	-0.557985	6.17435276315709	-2.95686	0.00842103307436324	0.100194090869179	-2.57147
BX538226	0.605198677764575	4.75110513577237	2.9536556597879	0.00847984822743548	0.100580055699183	-2.57774
OR2S2	0.546993383560157	5.34144720274364	2.94950419428265	0.00855657746251977	0.100862695694205	-2.58586
ATF6B	0.581030128620111	6.7981151239881	2.94900732794294	0.00856580568919222	0.100894417721968	-2.58683
FAM212B	0.714665266688305	7.6596421917945	2.94888452321279	0.00856808800846957	0.100894417721968	-2.58707
ZNF567	-0.627449	5.36442398048843	-2.94832	0.00857863540959677	0.100914744561221	-2.58818
PTPN22	-0.625695	7.31801326020995	-2.94786	0.00858723762605696	0.100964027175839	-2.58908
RAD9B	0.548346838723393	4.32490315813064	2.94554780465584	0.00863032656046769	0.101210595440031	-2.59359
ARMC7	0.563404870103245	7.65213004528117	2.93990080924268	0.00873665624543426	0.101727580099509	-2.60463
FLJ30403	0.760526622087133	3.61267871907728	2.93930351890932	0.00874797674654913	0.101733705050538	-2.60579
CCSER2	-0.515969	7.59943580236872	-2.93911	0.00875164242418417	0.101733705050538	-2.60617
CDA	0.774844419684547	8.24406894793511	2.93862165696953	0.00876091749472638	0.101751163593573	-2.60713
TTC39B	-0.619572	5.88410220751481	-2.93605	0.00880997809458803	0.101958674154868	-2.61216
RACGAP1P	-0.557616	3.0295179402435	-2.93168	0.00889376328601299	0.102454026791069	-2.62068
LIMS3	0.71830331630564	4.03651030083681	2.93084929665269	0.00890974076643929	0.102454026791069	-2.6223
ELK4	-0.685023	7.50605898808923	-2.92887	0.00894793333302179	0.102733746468228	-2.62615
KMT2A	-0.698267	7.31958182616868	-2.92678	0.00898869705842222	0.10298517210651	-2.63025
SLC41A2	0.501566078868382	4.74827982753142	2.92568878604956	0.0090099008221446	0.103112033857395	-2.63237
LOC254057	0.539362842848651	5.53185770174183	2.91934945018776	0.00913443169001467	0.103244244614252	-2.64473
MARCO	0.545220011617497	6.08043556080303	2.91114642542342	0.00929804482857543	0.104386293266833	-2.66071
KRR1	0.649203671181577	8.2684292118063	2.90972740679864	0.00932663369526259	0.104571515679207	-2.66347
ATP6V0D2	1.03646827594511	6.03492723398029	2.90898367169488	0.00934165158132254	0.104571515679207	-2.66492
C19orf60	0.532600953317859	7.7241611010064	2.90896812171817	0.00934196582378926	0.104571515679207	-2.66495
ATF5	0.880106600681887	6.47398407857381	2.8982651464785	0.00956069750311392	0.105562307739805	-2.68578
ANPEP	0.645318415521256	8.67567096160805	2.89694273177926	0.00958806399319032	0.105671919154236	-2.68835
FGF23	-0.677343	4.18964598079397	-2.89664	0.0095943938272156	0.105690770710974	-2.68894
LOC441124	0.80989948390681	7.31760812138156	2.89366749635428	0.00965616887273947	0.105882453247555	-2.69472
HSPA1L	0.530055927078484	6.80601691139042	2.89109050017238	0.0097100827390218	0.10604615420946	-2.69972
ZNF571	-0.500105	4.18972850133558	-2.88504	0.00983778608691324	0.106604061603966	-2.71148
CLMN	0.948636610397729	6.26234616666575	2.88468819971649	0.00984528730618799	0.106604061603966	-2.71216
KIF3A	-0.608405	5.94036419778221	-2.88386	0.00986285208506599	0.106604061603966	-2.71376
MAF	-0.718359	8.67457968213473	-2.88347	0.00987125332500814	0.106604061603966	-2.71453
ADAM19	0.589135666316681	8.51039103957397	2.87472052250058	0.0100594088424638	0.107250360818067	-2.7315
COX8C	0.615367359156527	3.02955127631746	2.87345775115224	0.0100868536852465	0.107277979930405	-2.73395
CRISPLD2	0.853003483865057	8.20043581305464	2.87207300397905	0.0101170325459515	0.107499684332458	-2.73664
CR1L	0.763273362060376	3.77961435989993	2.87129797163323	0.0101339614111033	0.107593984726702	-2.73814
LYRM1	0.503112228903577	8.92384308166638	2.86884941929351	0.0101876242847496	0.108044357776151	-2.74289
HDGFRP3	0.549623364090795	7.90988	2.8660216853902	0.0102499383238431	0.108365508989472	-2.74837
AURKC	-1.09429	5.81608334806505	-2.86522	0.0102676554847434	0.108409763493737	-2.74992
LOC101929040	0.63496439723171	4.23619091086202	2.86062909003846	0.0103697936310707	0.108847792560122	-2.75881
ATP5J2	0.574283576592107	6.08926054338322	2.85993763425758	0.0103852592289662	0.108847792560122	-2.76015
AK097453	0.621719444367754	6.42560878700203	2.85821722845776	0.010423835588898	0.109102176703562	-2.76348
KIF21A	-0.995079	6.32383521808694	-2.85692	0.0104529880169918	0.109307296996696	-2.76599
PSMG1	-0.502586	6.55484101787588	-2.85428	0.010512596688848	0.109647003074788	-2.7711
PYGB	0.623670314725874	7.24453552503136	2.85399836880375	0.0105190197442815	0.109647003074788	-2.77165
ZMYND11	-0.560768	8.47746304197196	-2.84729	0.0106720529839486	0.110587215703235	-2.78462
PDGFA	0.97970908552178	6.1357454661059	2.84652495226126	0.0106896911573941	0.110649567898677	-2.7861
ZNF573	-0.600684	6.60854447394597	-2.84613	0.0106987497729716	0.110649567898677	-2.78686
PTTG2	-0.702152	4.15742367966876	-2.84577	0.0107071144344018	0.110649854678912	-2.78756
CHMP2A	0.685884799294143	9.46618478304512	2.84191352677743	0.0107963301701384	0.111250762021036	-2.79501
AUTS2	-0.847088	6.9065079865078	-2.84166	0.0108022260235803	0.111250762021036	-2.7955
LOC284219	0.52695091007966	4.72640378822482	2.83920073713157	0.0108595410749796	0.111538444886396	-2.80025
TDRD3	-0.688593	6.34345311374887	-2.83912	0.0108613485667347	0.111538444886396	-2.8004
LOC101928625	-0.545264	6.28187788520929	-2.83547	0.0109470608608487	0.111866347698177	-2.80746
RP11-1109M24.16	0.65601156056412	3.68907183976902	2.83275066989026	0.0110112683697086	0.112188909263082	-2.81271
N4BP2L2-IT2	0.811714586051312	6.31853814548286	2.8324031207564	0.0110195015634163	0.112188909263082	-2.81338
VPRBP	-0.516159	6.55280647121618	-2.83195	0.0110303628832235	0.112216408522967	-2.81426
C12orf66	-0.578325	4.90186258643518	-2.83019	0.0110720025071304	0.112440043214888	-2.81764
KCNMB3	0.700749025996228	5.20406861135555	2.82857743938793	0.0111105216445084	0.112681176962035	-2.82076
SYT2	0.935469388001552	5.95902218462413	2.82736069496032	0.0111396215748128	0.112841539692433	-2.8231
LOC440149	0.74431388972241	5.81364907791413	2.82717851651949	0.0111439849015222	0.112841539692433	-2.82346
B4GALT5	0.572918164217446	9.53456722777773	2.82688605408462	0.0111509930613895	0.112841539692433	-2.82402
SH3RF1	-0.510383	4.15061578208902	-2.82593	0.0111739591214304	0.112975411062001	-2.82587
UBL7	1.48363280908834	6.71315714804315	2.8245005011387	0.0112083156635289	0.113121421429882	-2.82862
VPS37B	0.50589644359385	7.51576568781523	2.82404034790676	0.0112194052792827	0.11313353582635	-2.82951
GIMAP1	-0.6159	9.02265966763247	-2.82368	0.0112281091006414	0.113171425648755	-2.8302
BIN1	-0.623925	8.76873805575461	-2.82006	0.0113158793275436	0.113555841672893	-2.83719
PKLR	-0.602804	4.75007957182416	-2.81856	0.0113523499226049	0.113709026139025	-2.84007
MLST8	0.527367488093682	5.91584167838912	2.81668139932107	0.0113981950981465	0.113932155458974	-2.84369
ADAD2	0.623977170883752	5.35393663358777	2.81407404119476	0.011462197207703	0.114377283885307	-2.84871
CTD-2196E14.6	-0.570917	3.72076364237985	-2.81337	0.0114795485226214	0.114377283885307	-2.85006
C16orf58	0.570635711421977	5.98808657117875	2.81215987274955	0.0115094035628832	0.114377283885307	-2.85239
ADAT2	-0.558897	4.92445166045618	-2.81198	0.0115137551036343	0.114377283885307	-2.85273
ZFPL1	0.53016333310489	6.3695368962061	2.81020062188392	0.0115579152382722	0.114377283885307	-2.85617
STAMBPL1	-0.501358	7.19819841741033	-2.80969	0.011570488068529	0.114377283885307	-2.85714
LOC401176	-0.691528	3.02366	-2.8092	0.0115826731395052	0.114377283885307	-2.85808
TRAV12-1	-0.658162	6.16431596240427	-2.8068	0.0116425318208999	0.114769981931146	-2.8627
RP11-286E11.2	2.50714854036549	4.89905664029831	2.80375386317818	0.0117189300925804	0.115274627253622	-2.86857
ANKRD13C	-0.584168	5.88368959162884	-2.80339	0.0117280282068706	0.115274627253622	-2.86926
NOP14-AS1	0.515845255204495	5.04260198578784	2.8013557415463	0.0117793740611437	0.115274627253622	-2.87318
MUC5AC	0.962556931802361	5.07222878571612	2.79963306551716	0.0118229783487906	0.11544330206561	-2.87649
RPL17	-0.538179	6.60993414318685	-2.79265	0.0120012167405992	0.116044052630499	-2.8899
FITM2	-1.45518	5.36766754641039	-2.78951	0.0120824776548679	0.116388922298933	-2.89594
ADAM15	0.549090337977022	7.23243240179941	2.7866550888301	0.0121564956989822	0.116474297149377	-2.90141
POU5F1B	0.610084883863531	7.63878685515571	2.78552560560823	0.012185945449732	0.116609967331605	-2.90358
USP3-AS1	0.908427266657466	6.00687118806822	2.78255693672875	0.0122636763581389	0.117132464927651	-2.90928
PREX1	0.79106985136977	9.68505842362011	2.7807564164125	0.0123110523293837	0.117316483671928	-2.91273
FAM76B	1.13225950039925	7.36680112452682	2.77974785428746	0.0123376666854901	0.11747768574926	-2.91466
INPP5B	0.547316111391074	7.99303971255807	2.77832858234857	0.0123752125450322	0.11747768574926	-2.91738
CSMD2	0.827010246873582	4.84174297287882	2.77672156793408	0.0124178573376475	0.117648271588147	-2.92046
CEACAM3	0.610718059859021	8.45291669260939	2.77088032203532	0.0125740550655587	0.118539567907522	-2.93165
NAP1L2	-0.71085	5.74513990569007	-2.76647	0.0126931409649213	0.119121847939869	-2.94009
CCR5	-0.748726	7.67286747021536	-2.76623	0.0126997875451828	0.119135358357435	-2.94056
PLEKHA5	-0.570334	4.46213436617126	-2.76441	0.0127492770636551	0.119257342279816	-2.94404
SYN2	0.669758461869517	5.64336594295192	2.76348387310399	0.0127745444755653	0.119314841213933	-2.94581
AK126278	-0.550853	5.93172522567923	-2.76129	0.0128347114217016	0.11947038133789	-2.95001
DOCK10	-0.551092	7.38783099500512	-2.75525	0.0130012160646066	0.120154749527178	-2.96154
CSF2RA	0.538827124877961	8.25181393441274	2.75490027242873	0.0130110550980821	0.120154749527178	-2.96222
ISOC1	-0.609189	6.37472441852461	-2.75407	0.0130342695946877	0.120154749527178	-2.96381
CA4	0.744884352151333	6.62168637825156	2.75349647229309	0.0130501321550364	0.120187470007646	-2.9649
RRN3P3	0.826509371966417	6.13205379483692	2.75062074100589	0.0131305341861772	0.120508071472016	-2.9704
ABCB10	-0.511737	6.16530921497956	-2.74895	0.0131774753120481	0.120662628448591	-2.97359
CRYAB	1.25020189811882	4.85006170826221	2.74273338320928	0.0133534979000574	0.121724315519248	-2.98545
LOC441461	-0.660283	8.43962767322525	-2.74043	0.0134193181423354	0.122017727842053	-2.98985
PTOV1	0.508749911418378	6.58395081547759	2.73793881043848	0.0134908000153497	0.122127427559112	-2.99459
C7orf71	-0.982889	3.04044536048252	-2.73734	0.0135081826814164	0.122149315497448	-2.99575
UBR5	0.55694332315393	7.74923208233926	2.73648259307509	0.013532768547702	0.122190112222345	-2.99737
BCOR	-0.523493	5.56249867103212	-2.72461	0.013879768402634	0.123601785722016	-3.01999
ATHL1	0.706799807472575	7.73232236691152	2.72447609928021	0.0138835921899292	0.123601785722016	-3.02024
DYSF	0.518507698076109	9.23434624735832	2.72399221520424	0.0138979118546889	0.123681144782295	-3.02116
ITM2A	-0.601185	8.75808116621028	-2.72133	0.0139768975528737	0.124075567193627	-3.02622
ADAMTS12	0.675751516228144	5.32246704016252	2.72090856459773	0.0139894992137543	0.124075567193627	-3.02703
RFC5	0.583389259351863	7.45927373779074	2.72085689993406	0.0139910386083723	0.124075567193627	-3.02712
PDLIM2	0.697764962625207	8.10219183835032	2.71944673199298	0.0140331184152393	0.124256094946082	-3.02981
PHC2	0.608746314326488	10.4169434617174	2.71673689900396	0.0141143205081719	0.124541324036626	-3.03496
PIP5KL1	-0.731726	5.61344272927944	-2.71201	0.0142570167834087	0.125175043568262	-3.04394
AP5Z1	0.616015100408841	6.90798518352666	2.71026790379677	0.0143099884746178	0.125175043568262	-3.04725
ITGA4	-0.510052	9.03980150310483	-2.7102	0.0143119794415009	0.125175043568262	-3.04737
LIFR	-0.513175	4.8467109633892	-2.70633	0.0144304856869166	0.125684272113039	-3.05473
PGLYRP1	0.891796277505204	6.81514476442089	2.70632168953189	0.0144306198794123	0.125684272113039	-3.05474
PDHA1	0.602352122379582	7.71977741910272	2.7054154704454	0.0144584588478075	0.125727280903778	-3.05646
GPR18	-0.595877	7.95955197320229	-2.69953	0.014640440924313	0.12645481075515	-3.06762
ELL	0.89273757413288	6.03385596193252	2.69916947334963	0.0146517352846112	0.12645481075515	-3.06831
TNFRSF17	-0.774714	5.44611153167445	-2.69468	0.0147922731357827	0.127082528819133	-3.07683
MICAL1	0.738017522817326	7.50290217695388	2.69445520612385	0.0147992450897737	0.127082528819133	-3.07725
ARAP3	0.527187355366444	7.52731595370967	2.69334661261158	0.0148341384105121	0.127195316815952	-3.07935
OCLN	-1.15462	5.44277617221293	-2.69324	0.0148376005499027	0.127195316815952	-3.07955
TPD52	-0.624089	7.04375397343701	-2.69077	0.0149154916009998	0.127363877879865	-3.08422
LILRA5	0.623507233015875	8.17475419140843	2.68949078669813	0.0149561143022276	0.127447260795146	-3.08665
ITGB1BP1	0.862569209397999	7.02344271706211	2.68774990474012	0.0150114987871023	0.127633999349276	-3.08995
PDCL2	-0.502467	2.02802705443649	-2.68449	0.0151157924516029	0.128282392912713	-3.09612
SIX3-AS1	0.531208927351225	5.61447422326632	2.68056899427853	0.015242027855449	0.128685460270359	-3.10353
DEFA1	0.982236417815527	11.1330506053078	2.67837673253283	0.0153130763662502	0.129001178849217	-3.10768
ZNF780A	-0.641798	5.32452399207086	-2.67306	0.015486710187724	0.129840941405323	-3.11773
UAP1	-1.10583	6.00581870611937	-2.67144	0.0155400986939976	0.130055267780245	-3.12079
TRIB2	-0.57307	7.61248639137797	-2.66985	0.015592333294059	0.130154172115312	-3.12378
CENPK	-0.742428	6.43430080216429	-2.66645	0.0157051188379789	0.130809289775375	-3.1302
RAB11FIP3	-0.554604	6.05544871853883	-2.66333	0.015809369733779	0.131247597789863	-3.13609
TARSL2	-0.518593	5.87519783688167	-2.65659	0.016036585106267	0.13222236656987	-3.1488
WDR55	0.76782026253483	6.74300617918269	2.65308745453308	0.016155833517581	0.132727278593269	-3.1554
PXMP2	0.697259004089537	5.47099332260098	2.65026627296827	0.0162525415861966	0.133044061356772	-3.16071
CEP68	0.505153659756051	7.4605380439907	2.64776544300432	0.0163387287936984	0.133463089896401	-3.16542
ENPP5	-0.595063	4.99207414336524	-2.64702	0.0163643393475537	0.133578909118591	-3.16681
GK-AS1	0.757241320527957	8.41701634596258	2.64672299667794	0.0163747833996729	0.133614495072937	-3.16738
CLUAP1	0.669435036102649	6.05055782454285	2.6452299896738	0.0164265532523691	0.133798340482095	-3.17019
LRIG1	-0.735661	6.57706569490832	-2.64433	0.0164577210742059	0.133897450629611	-3.17187
TSC22D4	0.518688672931996	7.29785524201828	2.64018824915225	0.016602528523009	0.134323144486014	-3.17967
BLNK	-0.661223	6.31806504879945	-2.63691	0.0167179250714561	0.135037312411128	-3.18583
TNFRSF9	0.6923359752957	6.05661701257661	2.63304181168044	0.0168550407054116	0.135501341118357	-3.19309
GTPBP4	-3.01845	7.0719378647192	-2.63268	0.0168678903654675	0.135511703497856	-3.19377
BCAS3	0.673051629769722	6.9954243727725	2.6284811762127	0.0170180907093076	0.136109313878412	-3.20165
NFXL1	-0.653141	7.02224121430685	-2.62533	0.0171315623592846	0.136430173316655	-3.20756
LRRD1	0.688184226132399	3.29238273850933	2.62429677383159	0.0171690078445172	0.136540458631405	-3.2095
OGDH	0.6655816112513	6.89434494355484	2.62368527655726	0.0171911687083232	0.136574284738346	-3.21065
PAX2	0.967708212656772	5.88622499621953	2.61964234435916	0.017338371298713	0.137124761601989	-3.21822
LINC00115	-0.583405	5.0291727379406	-2.61514	0.0175036933243143	0.137612999879123	-3.22665
ANKRD44-IT1	-1.01195	5.19091413853123	-2.61491	0.017512093218576	0.137612999879123	-3.22708
KIF9-AS1	-0.748883	5.16312269261002	-2.61288	0.0175871869643898	0.13794817886364	-3.23088
MIR3917	-0.546907	5.9311266475924	-2.60936	0.0177180010587367	0.138664985000343	-3.23746
VGF	0.539974762844358	5.78433981409298	2.6066165125781	0.017820826094706	0.139024934582367	-3.2426
RAPGEF3	0.582661983170852	4.9252988252294	2.60555872948098	0.0178605591892002	0.139157373789931	-3.24458
CCL8	-0.530876	4.67432587452318	-2.60529	0.0178705513433863	0.139157373789931	-3.24508
DQ588163	0.615800771242961	5.19401263063323	2.60458282997392	0.0178972910861615	0.139157373789931	-3.2464
RBL1	-0.562797	5.86837932876062	-2.60392	0.0179223271820843	0.139240355153171	-3.24765
CA6	-0.564134	3.71818208773343	-2.60306	0.0179547539132981	0.139255854080088	-3.24925
UTS2B	0.584241577040251	3.22917605895632	2.59980847041969	0.018078028997555	0.139596794959183	-3.25533
MIR155	-0.650232	5.25533952859936	-2.59752	0.0181654524277107	0.139854064963864	-3.25961
FAM92A1	0.663643962685557	4.96653888539669	2.59722049473276	0.0181767217341018	0.139854064963864	-3.26016
LPAR2	0.65493336458203	8.34848911874402	2.59696339651872	0.0181865540663803	0.139854064963864	-3.26064
PHOSPHO1	0.746764779866049	5.19056633669062	2.58998328975638	0.0184554335259221	0.141035510712458	-3.27366
SLC25A37	0.577686963125091	10.1005436672915	2.58859462348334	0.0185093737717524	0.141237044287642	-3.27625
CPNE6	0.6993199382354	5.84998970579656	2.58836533254235	0.0185182945317232	0.141237044287642	-3.27668
S100A12	0.539144611933912	10.9151692488581	2.58835123299865	0.0185188432195335	0.141237044287642	-3.2767
DOCK5	0.65710051945603	9.95948743672329	2.58769525074943	0.0185443880050389	0.14126128807644	-3.27793
SYTL2	-0.810317	7.10366933507621	-2.58756	0.0185498429660515	0.14126128807644	-3.27819
MYBL1	-1.01873	7.85565935439797	-2.58726	0.0185614759013371	0.141279630280304	-3.27874
RORA	-0.650571	8.89177493242764	-2.58668	0.0185840031305988	0.14140405441573	-3.27982
CYLC1	-0.580168	3.04448018905569	-2.58394	0.0186914244803015	0.141938198509558	-3.28493
LOC100129029	0.51626135744793	5.25743138556324	2.58277256731919	0.0187371522179429	0.142096799054204	-3.2871
DYNLRB2	0.974827009591085	2.95096183392929	2.58210722868712	0.0187633510124582	0.142248333719365	-3.28834
KPNA5	-0.566033	6.01124333008109	-2.58144	0.0187898303660653	0.142307619588075	-3.28959
GNPDA2	-0.558738	5.5990658040249	-2.57923	0.018877003372423	0.142873250797565	-3.29369
MMP3	-0.641118	2.78653270716954	-2.57591	0.0190091793422067	0.143555325408715	-3.29988
ZCCHC10	-0.527374	6.7273770397795	-2.57569	0.0190180147517062	0.143555325408715	-3.30029
UBA1	0.50880090802641	8.7693590898795	2.5726505505688	0.0191394961939036	0.143825831717788	-3.30594
OTOGL	-0.536431	3.13981434662724	-2.57251	0.0191453236395699	0.143825831717788	-3.30621
CD83	0.852985071822866	6.39089825236573	2.57083684422876	0.0192124490338101	0.14400584322832	-3.30931
SLC2A14	0.523530609359879	9.36229977769629	2.5638352227766	0.0194965533275686	0.144994926722149	-3.32231
C1QA	-0.594758	5.60428655167757	-2.56183	0.0195785342254805	0.145346159337766	-3.32603
CD226	-0.547016	5.83381639147643	-2.55488	0.0198658145101947	0.146483092982874	-3.33893
TTC29	1.02940371043541	3.47585384804393	2.55385837019706	0.0199082602416497	0.146699193020594	-3.34082
MRVI1	0.663318339937691	8.4330768879413	2.5515856711978	0.0200031892547407	0.147019906889967	-3.34503
PROSER2	1.05636930425292	6.25113085464297	2.54837294340711	0.0201381130862335	0.147322321450795	-3.35098
DDN	0.820917569196631	5.90077152678753	2.54828869647607	0.0201416627274788	0.147322321450795	-3.35114
NAPSB	0.626029430061422	7.21919459077807	2.54334613399036	0.0203509499290513	0.148207841526533	-3.36029
ZNF295-AS1	0.509911434320609	4.92490624639475	2.54323216214927	0.0203558000974284	0.148207841526533	-3.3605
GIMAP6	-0.5151	8.89758494035809	-2.54084	0.020457685012317	0.148459383078493	-3.36492
HIST1H3G	0.501367620091004	6.02957246143146	2.53952271681182	0.0205142563857384	0.148700297408259	-3.36736
REM2	0.561130156154408	7.0003107772414	2.53926317819271	0.0205253866076819	0.148700297408259	-3.36784
MAN2B1	0.54512723844653	7.80291051376167	2.53794390728273	0.0205820513435588	0.148789047311414	-3.37028
ENOSF1	-0.601474	6.71789506647839	-2.53507	0.0207060870156097	0.149372290033301	-3.37559
CIZ1	0.513440246311238	6.67118594835458	2.53404729636896	0.0207502809653737	0.149490410241055	-3.37748
TMEM121	0.540724598743258	4.79619629601846	2.53071274054772	0.0208952752391395	0.150009189320458	-3.38364
ATP5S	0.53380562147755	7.03720764827714	2.5306948921738	0.0208960538961526	0.150009189320458	-3.38367
MAGOH2	0.579043766052241	6.33279800815033	2.52690548241276	0.0210619933373702	0.150593252362197	-3.39066
EMR3	0.705774828593843	8.25815093215376	2.5192656143094	0.0214003347733246	0.151903448756406	-3.40475
CCDC177	0.501332354990343	4.39787337841726	2.51924016444018	0.0214014703770232	0.151903448756406	-3.4048
TYRO3	0.545783690718096	5.37312188810298	2.51831760310245	0.0214426745778024	0.151903448756406	-3.40649
FAM205A	0.513183440337747	5.48122411493955	2.51798182461692	0.0214576899641916	0.151903448756406	-3.40711
LIM2	0.515412478310019	5.24210544409046	2.51186955919673	0.0217327586862226	0.152951559132812	-3.41837
DHRS13	0.515249378187992	7.24997840732494	2.51117347953974	0.0217642942512192	0.153038317723808	-3.41965
VWC2	-0.629536	1.91904709270504	-2.50953	0.0218390447575716	0.15340522229815	-3.42267
PDYN	0.554872885071771	4.11122104260958	2.50791899033303	0.0219123106768335	0.15340522229815	-3.42563
LOC101928290	1.02353022856679	6.14948610419747	2.50786187305017	0.0219149168647682	0.15340522229815	-3.42574
RASL10A	0.598437849131404	5.69301758825961	2.50432924241132	0.0220766753428861	0.153904427740778	-3.43223
EIF2B5	-0.800791	7.13924143121741	-2.50056	0.0222504642705614	0.154571032623754	-3.43915
STPG1	0.86120483225499	5.59928448592373	2.49747803365578	0.0223936032505535	0.155121296510041	-3.44481
CPSF2	0.521846677538623	7.70323667906741	2.49592934150326	0.0224658352622616	0.155386430108992	-3.44765
C14orf159	0.528173425641583	8.67340504271247	2.49516030584359	0.0225017850761546	0.155526586465978	-3.44906
OK/SW-CL.36	1.31560083777177	3.75523891488312	2.49102114683105	0.0226962090882278	0.156388348230042	-3.45665
PWAR6	-0.62754	4.66806638366365	-2.48927	0.022778863096001	0.156663611893408	-3.45986
KLHL15	-0.690813	6.03527501491353	-2.48756	0.0228598139202475	0.156980813160483	-3.46299
SIPA1L2	0.738487071223809	6.61753816516324	2.47973527871606	0.0232343928887199	0.158673262171261	-3.47732
DGAT2	0.752457949128333	8.62823805027136	2.47316448202785	0.0235532379753357	0.159957876187498	-3.48933
ATP1A1-AS1	0.606736112462815	5.31589060550617	2.46958063010834	0.0237288723419128	0.159980827487337	-3.49588
SPIDR	0.53860909695733	6.55738576796597	2.46790052851227	0.023811632532677	0.160144077703601	-3.49894
TP53I11	0.580580091055182	6.56746755244704	2.46695027346916	0.0238585612231206	0.160318320348018	-3.50068
ENPP4	-0.946242	6.48562735492611	-2.46541	0.0239346774185105	0.16047706293671	-3.50348
SURF4	0.590802704284918	7.95098916269798	2.45597350163762	0.0244069906096548	0.162193420025821	-3.52069
ISYNA1	0.594865889204903	6.52885833604501	2.45521181864374	0.0244454823773924	0.162360034291847	-3.52208
METTL8	-0.519262	6.24412054920954	-2.45448	0.0244825634888203	0.16246842510971	-3.52341
RP11-549J18.1	-0.607064	4.34948684819395	-2.45088	0.0246656910109003	0.162965928480912	-3.52997
LOC102724611	-0.542679	5.48429048275988	-2.44817	0.0248038817627969	0.163202605535775	-3.53488
HEATR4	0.765758394084247	3.97924782733773	2.44814445122651	0.0248053606986305	0.163202605535775	-3.53494
LPPR1	0.534010102190864	4.21241790937253	2.44341650732367	0.0250488823539257	0.163654605441982	-3.54353
ANO7	0.732298638743578	6.72386787452529	2.44257235939704	0.0250925970786534	0.163718229875118	-3.54506
DGAT1	0.552219203470733	6.43738145345268	2.44211403753201	0.0251163615270175	0.163814809503466	-3.54589
OR2M4	0.502027561523696	3.61260942728468	2.44172498478238	0.0251365508674849	0.163821596649987	-3.5466
CTC-360P9.3	0.531691448853942	4.82699563817887	2.4374648998001	0.0253586200561589	0.164550546478989	-3.55433
TMEM14A	-0.60168	6.37849654059928	-2.43364	0.0255596371670481	0.165519694566028	-3.56127
CALML4	0.588762906665967	6.68208069339033	2.43190950179062	0.0256509754055634	0.165836201548259	-3.56441
LOC100506076	-0.569716	6.1310271709718	-2.42638	0.0259451155997688	0.166671915221158	-3.57443
MSH2	-0.506847	5.31341458025692	-2.42569	0.0259819532920406	0.166671915221158	-3.57567
DOC2B	0.524053919495327	6.16161262482032	2.42538901063452	0.0259981485484718	0.166671915221158	-3.57622
SLC45A1	0.694942600709108	5.76396727045319	2.42532034308957	0.0260018279576906	0.166671915221158	-3.57635
AC018462.2	-0.612782	2.53400916178967	-2.42496	0.0260212734626895	0.166671915221158	-3.577
RP11-25I15.3	0.512038568814898	5.41854747271055	2.42410445455146	0.0260670596900163	0.166671915221158	-3.57855
GPR1	-0.588549	2.56093318645068	-2.42271	0.0261419110123245	0.166934670377333	-3.58106
CHRM3-AS2	-0.836075	5.33201213589098	-2.42086	0.0262417412995277	0.167245415301726	-3.58441
DOLPP1	0.535223577235312	6.68541027021675	2.41949359596115	0.0263158249920799	0.167505350906701	-3.58689
LOC101928893	-1.59803	5.8941	-2.41881	0.0263529370537493	0.167534092745147	-3.58813
SNRNP70	0.59677349012803	7.81367517633194	2.41808693578212	0.026392158650293	0.167597166227784	-3.58943
SLC12A3	1.04392691104638	5.06134488174498	2.41575723331763	0.0265190381539007	0.168075670388126	-3.59364
CLEC4D	0.502352849176834	7.31703261021196	2.41468363747325	0.0265776999765839	0.168075670388126	-3.59558
OXCT1	-0.51809	6.46169618170431	-2.41165	0.0267443552505979	0.168570481579526	-3.60107
LTB4R	0.526946797686574	7.7308237917364	2.40580868508593	0.0270673040460507	0.169813750791236	-3.6116
OLIG2	-0.777393	4.70861671296159	-2.4058	0.0270677774971869	0.169813750791236	-3.61161
ATAD2	-0.556517	5.32172556404883	-2.40209	0.0272746759013604	0.17047810355993	-3.61829
LOC102724356	-0.57796	6.7490276518768	-2.40154	0.027305571540815	0.170557323738424	-3.61929
FAM223A	0.536209943208688	5.98380181850175	2.39857698816175	0.0274724790928978	0.171277384519577	-3.62463
ONECUT1	0.568951759856812	5.77957064395403	2.39843	0.0274807376997976	0.171277384519577	-3.62489
SPATA1	0.570198800711145	4.45306832909972	2.39655401417629	0.027586832420214	0.171471536477722	-3.62827
RGS6	0.5538094492396	6.72743663911171	2.39373252070906	0.0277470669961719	0.171953654624164	-3.63335
HAUS7	0.501426601595693	5.6823684053157	2.39177925284259	0.0278585034080947	0.172406971005349	-3.63686
BET1	-0.530155	6.27627531081663	-2.38597	0.0281922108565622	0.173304079634106	-3.6473
RRP12	0.638712802277813	7.15499797621941	2.38446	0.0282797596519286	0.17346941041183	-3.65001
ZNF320	-0.532713	5.20334742012135	-2.38407	0.0283023567193121	0.17356149068289	-3.65071
CBX4	0.511355063414085	7.70395798638598	2.38369754572152	0.0283240333201816	0.173647878447415	-3.65138
BZRAP1	0.514322619583839	5.59722204138794	2.38120528736745	0.0284690536731912	0.173791875144774	-3.65585
C10orf25	-0.521629	4.96729217850857	-2.37803	0.0286549767466296	0.174143293960647	-3.66155
NLRC3	-0.587093	8.67223939178787	-2.3769	0.0287209141876676	0.17435248517215	-3.66357
RFXAP	-1.13463	5.06805411801056	-2.37501	0.0288323252828801	0.174704343875079	-3.66696
LZTS3	0.543945749606687	4.40237941833666	2.37377096002106	0.0289057722213739	0.174907163611115	-3.66918
BTNL8	1.02643891906103	7.32499861408445	2.37257086453415	0.0289768532468573	0.175208880097277	-3.67133
ANK3	-0.599526	5.36655937106438	-2.3657	0.0293871521350065	0.176531748386998	-3.68364
CHDH	0.623878979270799	6.04948814811143	2.36541718838504	0.0294039551181316	0.176531748386998	-3.68414
LTF	1.17853784557212	7.52638438802011	2.36473852715534	0.0294447771615945	0.176664526077433	-3.68535
MRE11A	-0.645364	6.53033030453825	-2.36223	0.0295960018846854	0.177160434484799	-3.68983
CYCS	-0.595277	8.94997518889294	-2.35374	0.0301140132905206	0.178672142638191	-3.705
ALAS1	0.50662847777015	6.96396544031223	2.35270877247989	0.0301771999615694	0.178874180083085	-3.70683
MRC2	0.651245209689475	7.90707198222512	2.34633539253614	0.0305720802497192	0.179771060424975	-3.71819
CFD	0.808937634637969	8.66269443872139	2.34469624085004	0.0306744131198993	0.179942364626871	-3.72111
TP53BP2	-0.759836	7.18786703197017	-2.34431	0.0306986107995039	0.179964003516098	-3.7218
VPS11	0.510196699376355	6.86842562000365	2.3417317748779	0.0308602958127979	0.180537859421329	-3.72639
ACOT4	0.608457960273029	5.26311465969812	2.34140333357961	0.0308809546281506	0.180612536270983	-3.72697
NFIA	0.716220949022105	5.14800305999087	2.33999751272517	0.0309695256224422	0.180740471086449	-3.72947
RSF1	-0.794394	9.73445480127823	-2.33724	0.031144245983042	0.181318154730789	-3.73438
PHLDB2	-0.663047	5.16797474339565	-2.33605	0.0312193373055026	0.181616688927002	-3.73649
NQO2	0.763646475708292	8.58346799036355	2.33353267465954	0.0313798799755899	0.181995349516222	-3.74096
ALCAM	-0.613518	8.09028392514259	-2.33322	0.0313995387142994	0.182063214846217	-3.74151
AX748417	0.786762704385663	6.72739231361493	2.33278119626982	0.0314279065262976	0.18213538533984	-3.7423
GUK1	-0.509508	8.51306442237976	-2.33194	0.0314817380616907	0.18213862376356	-3.74379
ZDHHC11	0.512703247536601	5.79890735718658	2.33112249910251	0.0315341548644495	0.18213862376356	-3.74524
YME1L1	-0.507754	9.84592792515606	-2.32843	0.0317071186868571	0.182674454434534	-3.75002
EBF1	-0.649052	5.32986009160905	-2.32823	0.0317205248019407	0.182674454434534	-3.75038
SLC10A4	-0.553541	2.86109576174826	-2.32243	0.0320961736347807	0.183746533673686	-3.76065
LOC102724870	1.20100380534806	5.92745938316741	2.32081097027944	0.0322021862325081	0.183966547066114	-3.76353
TSEN15	-0.505255	7.2681484577882	-2.32007	0.0322505862384725	0.184105142998067	-3.76484
INPP4B	-0.659382	6.29824	-2.31947	0.0322903404538509	0.184286103662786	-3.76591
BC005081	0.857712065890014	4.73307547935115	2.31892037440458	0.0323260852147533	0.184352150975463	-3.76688
CRISP2	-0.718667	3.61617126640846	-2.31608	0.0325128013333401	0.184909991177435	-3.7719
FOXP4	0.645683945010161	6.35728576354546	2.3151726519713	0.032572999100853	0.18508488902849	-3.77351
S100P	1.87562980781048	8.50973388554866	2.31465402265952	0.0326073058939985	0.185125349591734	-3.77443
KLRG1	-0.693751	7.52451325270918	-2.31451	0.0326168602989524	0.185133655083114	-3.77468
RALGAPA1	-0.520201	6.50010127528214	-2.31309	0.0327111618236498	0.185472368728656	-3.7772
KLRC1	-0.824199	7.68076744253325	-2.31125	0.0328334211133334	0.185837503614645	-3.78045
FOS	0.6545567775559	10.0758031604249	2.31105273395851	0.0328464538731479	0.185837503614645	-3.78079
MYB	-0.641506	5.91692806193661	-2.3091	0.0329768001122394	0.186068849955126	-3.78424
RNF166	0.525286056047985	8.40318859385436	2.3045439061793	0.0332828136042608	0.187047043811037	-3.79229
CEACAM8	1.1272489165748	5.60340613427677	2.29896989996899	0.0336607683853585	0.188226781132649	-3.80212
TBC1D2	1.07351418468006	5.68610515067819	2.29706523145078	0.0337908269232573	0.188766347677017	-3.80548
IGFBP3	-0.536852	5.64554	-2.29657	0.0338244415107643	0.188766347677017	-3.80634
POU5F1	0.69518364464412	6.75812094261448	2.29630836492002	0.0338426380319547	0.188766347677017	-3.80681
LINC01405	-0.513869	3.28489313574194	-2.2948	0.0339459935084686	0.189158385648748	-3.80946
SIGLEC5	0.652133223450548	8.45223783198586	2.2925333579851	0.0341021560762902	0.189612960152009	-3.81346
WDR37	0.50440439739008	8.16403334575878	2.29072906671901	0.034226844594078	0.190159147237982	-3.81663
LOC100996747	0.828243991608582	10.2854081144218	2.2867964346481	0.0345000800116216	0.190990038873918	-3.82355
NOM1	-0.539363	5.67718625106638	-2.28607	0.0345506299285931	0.191084943864204	-3.82482
AQP3	-0.504215	9.18819112274348	-2.28376	0.0347124113204337	0.19146741396351	-3.82888
KLF12	-0.528816	8.13874182054974	-2.28233	0.0348125547306201	0.191660734479378	-3.83139
ABCD1P2	0.530192973109172	4.92181221847423	2.28231510928082	0.0348138991475654	0.191660734479378	-3.83142
LOC646626	0.523822658949674	4.81695054529523	2.27941294008675	0.035018540057413	0.192432692409445	-3.83651
AX746830	-0.588719	2.30344940729427	-2.27467	0.0353550610357556	0.19352243935361	-3.84482
RP11-489E7.4	1.01086984463277	7.75899040138553	2.27322773380205	0.0354583965592915	0.193717314535957	-3.84736
PLEKHG3	0.713586925997161	8.38716791120194	2.26772331226906	0.0358541301420858	0.194532249857938	-3.857
CMTR2	-0.617215	6.46132374194856	-2.26623	0.0359618469948727	0.194747232956849	-3.8596
LINC00639	-0.535959	5.35716246360424	-2.26452	0.0360861228427312	0.194945005115444	-3.8626
TSPAN4	0.543193129581734	6.12124531445837	2.26317279553931	0.0361843618023939	0.195263902975511	-3.86496
IRS2	0.553651668631815	9.38944860814744	2.26223947246253	0.0362524395305554	0.195580244390263	-3.86659
HIST1H2BN	0.628715476518371	6.0227383912554	2.25605228971026	0.0367067401560624	0.196580789386801	-3.87739
CDK14	0.544757173083055	7.45758091001252	2.25495906020224	0.0367875560891888	0.196644981022588	-3.8793
XCL1	-0.83897	7.03494059013832	-2.25453	0.0368193662019566	0.196644981022588	-3.88005
JAM3	0.75175667316631	6.86613442224418	2.25423299319533	0.0368413206236132	0.196716	-3.88057
AGPAT9	0.606705013118331	8.43261902799757	2.24888723011329	0.0372394071587502	0.198010140783687	-3.88989
OGFOD2	0.510379295117046	7.65950250074096	2.24669994206687	0.0374034305883613	0.198277219439445	-3.8937
RHOJ	0.50782128139124	5.20612787921164	2.24405584547223	0.0376025994051028	0.198740465324267	-3.8983
DEFA4	1.0713695676509	6.32036711301776	2.24031987129844	0.0378856822827112	0.199637128196322	-3.9048
LOC101928837	0.645195235270169	4.51415345534127	2.2345780501636	0.0383245842173866	0.200855430215524	-3.91478
KATNAL2	0.530645913525966	4.71210741241335	2.23208797467323	0.0385163768181093	0.201291617541878	-3.9191
NTNG2	0.621791920149847	6.86798752162557	2.2314270242322	0.0385674333505037	0.201435711042048	-3.92025
SLC2A6	0.672536850578723	6.33888895997201	2.22404658923123	0.0391417998602905	0.203029784811482	-3.93304
IGF2	0.754047449888413	4.45366854357311	2.21781727983911	0.0396326981973355	0.204555861663667	-3.94382
MMP9	0.813475454625342	8.71688043614701	2.21742218962424	0.0396640233301297	0.204569756452591	-3.9445
POGZ	-0.607434	7.55444682002303	-2.21696	0.0397007928313159	0.204569756452591	-3.9453
GPR137B	-0.51628	6.38677329697399	-2.21677	0.0397158591854201	0.204569756452591	-3.94563
CD3G	-0.593076	7.74034150048381	-2.21618	0.0397624940908413	0.204671735612699	-3.94664
FBXO5	-0.512714	5.86002797786987	-2.21583	0.039790439558494	0.204723466853686	-3.94725
ARMC10	0.90910578458374	8.04562334643336	2.20723083657646	0.0404799656306286	0.206506491333062	-3.9621
LBH	-0.615032	8.97428302990885	-2.20402	0.0407403409924757	0.207003997758793	-3.96764
ITGAD	0.754833968416595	5.92243044511259	2.19940193668681	0.0411172091545188	0.208133129525529	-3.97559
LOC145474	0.528396839513585	6.12890779095259	2.19547881879512	0.0414399891505139	0.208999607614517	-3.98234
RAB30	-1.33021	4.83600546903616	-2.1954	0.0414466736893968	0.208999607614517	-3.98248
CAMKK2	0.555377092890263	8.78360822359977	2.19178907136746	0.041745688878797	0.209702469072317	-3.98868
CAMP	0.629880406122505	7.86480564635719	2.18877102341436	0.0419972743918117	0.210308084500909	-3.99386
EMR1	-0.611281	8.11354360275441	-2.18727	0.0421226514894371	0.21066137027686	-3.99643
SH2B1	0.92218417569613	6.88638394642358	2.18458920919335	0.0423481705153707	0.210910119587561	-4.00104
PRKAB1	0.546830796201311	7.43915503422808	2.18297226329209	0.0424845676077004	0.211268617010255	-4.00381
CDC25B	-0.586977	8.30750132151961	-2.17974	0.042758046935413	0.211728411135044	-4.00934
WWC2-AS2	0.61976908531052	5.20168355718334	2.17808734719301	0.0428990830557258	0.212131190904475	-4.01218
ALPL	0.505760636472652	7.50537389741807	2.1762518397385	0.0430557927104074	0.21256835636746	-4.01532
VMP1	0.532529751457215	7.51579492549152	2.17613678184326	0.0430656334241242	0.21256835636746	-4.01552
LINC01314	0.52769746736907	6.27391226839967	2.17033723369398	0.0435643363271078	0.213432946264667	-4.02543
G6PD	0.599182980200787	6.66650976046255	2.17019601768821	0.0435765451631087	0.213432946264667	-4.02567
LEF1	-0.620589	9.11174386155544	-2.16749	0.0438110175869909	0.213992196595318	-4.03029
TSPAN13	-0.980066	7.38174030654087	-2.16413	0.044104299196434	0.214703482045619	-4.03604
WNT4	1.07913708520941	4.52748263241948	2.16266306814758	0.0442323639037615	0.215138473256768	-4.03853
CERS1	-0.551224	5.30726159321123	-2.15957	0.0445039754153633	0.216051550499366	-4.0438
IL1R2	0.650898045435561	9.85219347165377	2.15379470531031	0.0450160082277604	0.217155021769167	-4.05364
ABCA13	0.789085500351537	2.96490515453608	2.15202750397592	0.0451736735890085	0.217512133362386	-4.05664
LOC100289230	-0.552378	6.20815281838811	-2.15195	0.0451806638866859	0.217512133362386	-4.05678
PTPN18	1.10712180751277	8.27493861615525	2.15023158604884	0.0453344177749785	0.217512133362386	-4.0597
CDC42EP5	0.577030661915442	1.15222186768584	2.14726159578129	0.0456013946467877	0.217906174574737	-4.06474
HTATSF1P2	1.11525579351782	4.40111986135608	2.14596963662032	0.0457179783530345	0.218195107367007	-4.06693
TRAT1	-0.566095	6.83502849406272	-2.14415	0.0458828677067872	0.218707649664402	-4.07003
CD2	-0.538852	9.55257116276471	-2.14349	0.0459426653033283	0.218856585913003	-4.07115
JAKMIP1	-0.62331	5.91745054181797	-2.14232	0.0460485005754294	0.21909992078577	-4.07312
RBFADN	-0.813319	5.79553674560022	-2.14185	0.0460911291495619	0.219124876801742	-4.07392
TOX	-0.59941	7.05122003448119	-2.13965	0.0462920515941523	0.219606498128593	-4.07765
TMEM181	-0.543562	6.86169364703997	-2.13833	0.0464131038159826	0.219854188345163	-4.07989
NINJ1	0.613704860158439	9.39323220641165	2.13504074236238	0.0467151195003731	0.220752779278609	-4.08546
SPRN	0.528354700049837	5.50885243771745	2.12006898080775	0.0481133339736853	0.224339327759919	-4.11075
ABCB1	-0.539774	5.18163683912958	-2.11651	0.0484508526894468	0.225407789657288	-4.11674
LINC01115	0.503306957807361	4.65559508469402	2.11336649253515	0.0487515454706949	0.22605634186852	-4.12204
RNASE4	0.698552321717875	5.56651987430264	2.1126125570143	0.0488238152872092	0.226131355014443	-4.12331
ATP8B1	-0.592793	6.67986970804703	-2.11051	0.0490255424241834	0.226673351404411	-4.12684
CRTAM	-0.636562	6.31922095236537	-2.10911	0.0491608578028214	0.227003113325642	-4.1292
ITGA6	-0.56604	7.86953996640518	-2.10663	0.0494008850338112	0.227429732179991	-4.13337
EPHA4	-0.554312	5.17591089685032	-2.10652	0.0494116575437909	0.227429732179991	-4.13356
SH3PXD2A	0.697417648314214	6.68626358337362	2.10478732027432	0.0495796934903127	0.227682581827724	-4.13646
