# Supplementary material for: Identification and verification of biomarkers related to senescence-associated secretory phenotype in type 2 diabetes
Source: Research Square preprint supplement (doi:10.21203/rs.3.rs-7839443/v1), 2025-11-11
Supplement: Supplementary file 2 [file 5ef98691020f4f2b94176929.xlsx]

## Sheet: TF-mRNA-miRNA
Online Resource 5. Predicted TFs targeting the biomarkers MMP9 and CCL8.
gene	target
MMP9	CTCF
MMP9	ESR1
MMP9	SPI1
MMP9	RELA
MMP9	STAG1
MMP9	FOXA1
MMP9	KDM5B
MMP9	TFAP2C
MMP9	RUNX1
MMP9	SRF
MMP9	RAD21
MMP9	EP300
MMP9	MYB
MMP9	CREB1
MMP9	ERG
MMP9	GABPA
MMP9	REST
MMP9	BRD4
MMP9	FLI1
MMP9	PAX5
MMP9	STAT1
MMP9	MED1
MMP9	SMC3
MMP9	BCOR
MMP9	FOXA2
MMP9	CBFB
MMP9	CEBPB
MMP9	ELF1
MMP9	GATA3
MMP9	HDAC1
MMP9	IRF1
MMP9	KLF1
MMP9	LMO2
MMP9	MAX
MMP9	RARA
MMP9	TCF12
MMP9	TCF3
MMP9	YY1
MMP9	FOS
MMP9	JUND
MMP9	ZNF263
MMP9	E2F1
MMP9	NR2F2
MMP9	POLR2A
MMP9	SAP30
MMP9	MAFK
MMP9	ASCL1
MMP9	SMAD3
CCL8	CTCF
CCL8	SPI1
CCL8	IRF1
CCL8	STAT1
CCL8	SRF
CCL8	CEBPB
CCL8	TCF21
CCL8	MAFK
CCL8	hsa-miR-181a-5p
CCL8	hsa-miR-181b-5p
CCL8	hsa-miR-181c-5p
CCL8	hsa-miR-181d-5p
CCL8	hsa-miR-216b-5p
CCL8	hsa-miR-330-3p
CCL8	hsa-miR-374a-5p
CCL8	hsa-miR-374b-5p
CCL8	hsa-miR-4262
CCL8	hsa-miR-499a-3p
CCL8	hsa-miR-520g-3p
CCL8	hsa-miR-520h
CCL8	hsa-miR-656-3p
MMP9	hsa-miR-1303
MMP9	hsa-miR-330-3p
