# Supplementary material for: Identification and verification of biomarkers related to senescence-associated secretory phenotype in type 2 diabetes
Source: Research Square preprint supplement (doi:10.21203/rs.3.rs-7839443/v1), 2025-11-11
Supplement: Supplementary file 3 [file 61175ee328d3d9b9a2014b35.xlsx]

## Sheet: 05.GO_Enrichment_Results
Online Resource 3. GO enrichment analysis results for the 7 candidate SASP-RGs.
ONTOLOGY	ID	Description	BgRatio	pvalue	p.adjust	qvalue	geneID	Count
BP	GO:0071492	cellular response to UV-A	11/18614	6.65665e-06	0.00181629	0.000961735	MMP3/MMP9	2
BP	GO:0070141	response to UV-A	14/18614	1.10078e-05	0.00181629	0.000961735	MMP3/MMP9	2
BP	GO:0150077	regulation of neuroinflammatory response	41/18614	9.87125e-05	0.00982508	0.00520244	MMP3/MMP9	2
BP	GO:0030574	collagen catabolic process	45/18614	0.000119092	0.00982508	0.00520244	MMP3/MMP9	2
BP	GO:1904645	response to amyloid-beta	54/18614	0.000171864	0.0113431	0.00600621	MMP3/MMP9	2
BP	GO:0022617	extracellular matrix disassembly	62/18614	0.000226785	0.0124732	0.00660463	MMP3/MMP9	2
BP	GO:0150076	neuroinflammatory response	76/18614	0.00034094	0.0160729	0.00851068	MMP3/MMP9	2
BP	GO:0034644	cellular response to UV	93/18614	0.000510211	0.0210462	0.0111441	MMP3/MMP9	2
BP	GO:0032963	collagen metabolic process	108/18614	0.000687254	0.0251993	0.0133432	MMP3/MMP9	2
BP	GO:0071482	cellular response to light stimulus	127/18614	0.000948426	0.031298	0.0165725	MMP3/MMP9	2
BP	GO:0009411	response to UV	154/18614	0.00138975	0.0416924	0.0220764	MMP3/MMP9	2
BP	GO:0048660	regulation of smooth muscle cell proliferation	176/18614	0.0018095	0.0467785	0.0247695	IGFBP3/MMP9	2
BP	GO:0048659	smooth muscle cell proliferation	180/18614	0.00189156	0.0467785	0.0247695	IGFBP3/MMP9	2
BP	GO:0007565	female pregnancy	187/18614	0.00203941	0.0467785	0.0247695	MMP9/PAPPA	2
BP	GO:0071478	cellular response to radiation	191/18614	0.0021263	0.0467785	0.0247695	MMP3/MMP9	2
BP	GO:0044703	multi-organism reproductive process	207/18614	0.0024913	0.051383	0.0272076	MMP9/PAPPA	2
BP	GO:0044706	multi-multicellular organism process	216/18614	0.0027088	0.0525826	0.0278428	MMP9/PAPPA	2
BP	GO:0071241	cellular response to inorganic substance	231/18614	0.00309068	0.0545961	0.028909	MMP3/MMP9	2
BP	GO:2001234	negative regulation of apoptotic signaling pathway	233/18614	0.00314341	0.0545961	0.028909	IL7/MMP9	2
BP	GO:0033002	muscle cell proliferation	249/18614	0.00358062	0.0585251	0.0309894	IGFBP3/MMP9	2
BP	GO:0043084	penile erection	11/18614	0.00413001	0.0585251	0.0309894	VGF	1
BP	GO:0051549	positive regulation of keratinocyte migration	12/18614	0.00450474	0.0585251	0.0309894	MMP9	1
BP	GO:0034599	cellular response to oxidative stress	290/18614	0.00482391	0.0585251	0.0309894	MMP3/MMP9	2
BP	GO:0043568	positive regulation of insulin-like growth factor receptor signaling pathway	13/18614	0.00487935	0.0585251	0.0309894	IGFBP3	1
BP	GO:0044793	negative regulation by host of viral process	14/18614	0.00525383	0.0585251	0.0309894	CCL8	1
BP	GO:0051547	regulation of keratinocyte migration	14/18614	0.00525383	0.0585251	0.0309894	MMP9	1
BP	GO:0030198	extracellular matrix organization	314/18614	0.00563249	0.0585251	0.0309894	MMP3/MMP9	2
BP	GO:0043062	extracellular structure organization	315/18614	0.00566746	0.0585251	0.0309894	MMP3/MMP9	2
BP	GO:0045229	external encapsulating structure organization	317/18614	0.00573771	0.0585251	0.0309894	MMP3/MMP9	2
BP	GO:0009416	response to light stimulus	323/18614	0.00595088	0.0585251	0.0309894	MMP3/MMP9	2
BP	GO:0045579	positive regulation of B cell differentiation	16/18614	0.00600245	0.0585251	0.0309894	IL7	1
BP	GO:0071732	cellular response to nitric oxide	16/18614	0.00600245	0.0585251	0.0309894	MMP3	1
BP	GO:2000696	regulation of epithelial cell differentiation involved in kidney development	16/18614	0.00600245	0.0585251	0.0309894	MMP9	1
BP	GO:2001267	regulation of cysteine-type endopeptidase activity involved in apoptotic signaling pathway	17/18614	0.00637657	0.0585251	0.0309894	MMP9	1
BP	GO:0071214	cellular response to abiotic stimulus	339/18614	0.00653713	0.0585251	0.0309894	MMP3/MMP9	2
BP	GO:0104004	cellular response to environmental stimulus	339/18614	0.00653713	0.0585251	0.0309894	MMP3/MMP9	2
BP	GO:0032354	response to follicle-stimulating hormone	18/18614	0.00675058	0.0585251	0.0309894	PAPPA	1
BP	GO:1902170	cellular response to reactive nitrogen species	18/18614	0.00675058	0.0585251	0.0309894	MMP3	1
BP	GO:0062197	cellular response to chemical stress	349/18614	0.00691661	0.0585251	0.0309894	MMP3/MMP9	2
BP	GO:0010310	regulation of hydrogen peroxide metabolic process	20/18614	0.00749822	0.0603516	0.0319565	MMP3	1
BP	GO:0051546	keratinocyte migration	20/18614	0.00749822	0.0603516	0.0319565	MMP9	1
BP	GO:0071731	response to nitric oxide	21/18614	0.00787187	0.060412	0.0319885	MMP3	1
BP	GO:1903209	positive regulation of oxidative stress-induced cell death	21/18614	0.00787187	0.060412	0.0319885	MMP3	1
BP	GO:2001233	regulation of apoptotic signaling pathway	381/18614	0.0081977	0.0604662	0.0320172	IL7/MMP9	2
BP	GO:0007620	copulation	22/18614	0.00824539	0.0604662	0.0320172	VGF	1
BP	GO:0044827	modulation by host of viral genome replication	23/18614	0.00861879	0.0605149	0.032043	CCL8	1
BP	GO:1900120	regulation of receptor binding	23/18614	0.00861879	0.0605149	0.032043	MMP9	1
BP	GO:0043567	regulation of insulin-like growth factor receptor signaling pathway	25/18614	0.00936523	0.064386	0.0340927	IGFBP3	1
BP	GO:0050727	regulation of inflammatory response	414/18614	0.00962385	0.0648137	0.0343192	MMP3/MMP9	2
BP	GO:0090200	positive regulation of release of cytochrome c from mitochondria	27/18614	0.0101112	0.0660095	0.0349524	MMP9	1
BP	GO:0006979	response to oxidative stress	434/18614	0.0105392	0.0660095	0.0349524	MMP3/MMP9	2
BP	GO:0044342	type B pancreatic cell proliferation	29/18614	0.0108567	0.0660095	0.0349524	IGFBP3	1
BP	GO:0048245	eosinophil chemotaxis	29/18614	0.0108567	0.0660095	0.0349524	CCL8	1
BP	GO:0002360	T cell lineage commitment	30/18614	0.0112292	0.0660095	0.0349524	IL7	1
BP	GO:0034698	response to gonadotropin	30/18614	0.0112292	0.0660095	0.0349524	PAPPA	1
BP	GO:0009314	response to radiation	452/18614	0.0113955	0.0660095	0.0349524	MMP3/MMP9	2
BP	GO:0048873	homeostasis of number of cells within a tissue	31/18614	0.0116017	0.0660095	0.0349524	IL7	1
BP	GO:0071276	cellular response to cadmium ion	31/18614	0.0116017	0.0660095	0.0349524	MMP9	1
BP	GO:0072677	eosinophil migration	33/18614	0.0123462	0.0678188	0.0359104	CCL8	1
BP	GO:0002021	response to dietary excess	34/18614	0.0127183	0.0678188	0.0359104	VGF	1
BP	GO:0045577	regulation of B cell differentiation	34/18614	0.0127183	0.0678188	0.0359104	IL7	1
BP	GO:1901099	negative regulation of signal transduction in absence of ligand	35/18614	0.0130902	0.0678188	0.0359104	IL7	1
BP	GO:2001240	negative regulation of extrinsic apoptotic signaling pathway in absence of ligand	35/18614	0.0130902	0.0678188	0.0359104	IL7	1
BP	GO:0022411	cellular component disassembly	488/18614	0.0131991	0.0678188	0.0359104	MMP3/MMP9	2
BP	GO:0019221	cytokine-mediated signaling pathway	492/18614	0.0134069	0.0678188	0.0359104	CCL8/IL7	2
BP	GO:0043410	positive regulation of MAPK cascade	495/18614	0.0135638	0.0678188	0.0359104	CCL8/IGFBP3	2
BP	GO:0007617	mating behavior	37/18614	0.0138338	0.0681365	0.0360787	VGF	1
BP	GO:0045742	positive regulation of epidermal growth factor receptor signaling pathway	38/18614	0.0142054	0.0689378	0.036503	MMP9	1
BP	GO:1901186	positive regulation of ERBB signaling pathway	40/18614	0.0149482	0.0714914	0.0378551	MMP9	1
BP	GO:0014912	negative regulation of smooth muscle cell migration	42/18614	0.0156906	0.072607	0.0384458	IGFBP3	1
BP	GO:0019098	reproductive behavior	43/18614	0.0160616	0.072607	0.0384458	VGF	1
BP	GO:0045663	positive regulation of myoblast differentiation	43/18614	0.0160616	0.072607	0.0384458	IGFBP3	1
BP	GO:0071548	response to dexamethasone	43/18614	0.0160616	0.072607	0.0384458	PAPPA	1
BP	GO:0030890	positive regulation of B cell proliferation	45/18614	0.0168032	0.0740185	0.0391932	IL7	1
BP	GO:0044788	modulation by host of viral process	46/18614	0.0171738	0.0740185	0.0391932	CCL8	1
BP	GO:2001239	regulation of extrinsic apoptotic signaling pathway in absence of ligand	46/18614	0.0171738	0.0740185	0.0391932	IL7	1
BP	GO:0090199	regulation of release of cytochrome c from mitochondria	47/18614	0.0175444	0.0740185	0.0391932	MMP9	1
BP	GO:0035850	epithelial cell differentiation involved in kidney development	48/18614	0.0179147	0.0740185	0.0391932	MMP9	1
BP	GO:0035987	endodermal cell differentiation	48/18614	0.0179147	0.0740185	0.0391932	MMP9	1
BP	GO:0048009	insulin-like growth factor receptor signaling pathway	50/18614	0.0186552	0.0740185	0.0391932	IGFBP3	1
BP	GO:2000378	negative regulation of reactive oxygen species metabolic process	50/18614	0.0186552	0.0740185	0.0391932	MMP3	1
BP	GO:1904707	positive regulation of vascular associated smooth muscle cell proliferation	51/18614	0.0190252	0.0740185	0.0391932	MMP9	1
BP	GO:0046622	positive regulation of organ growth	52/18614	0.0193951	0.0740185	0.0391932	IL7	1
BP	GO:0048013	ephrin receptor signaling pathway	52/18614	0.0193951	0.0740185	0.0391932	MMP9	1
BP	GO:0009409	response to cold	54/18614	0.0201346	0.0740185	0.0391932	VGF	1
BP	GO:0030857	negative regulation of epithelial cell differentiation	54/18614	0.0201346	0.0740185	0.0391932	MMP9	1
BP	GO:0046686	response to cadmium ion	54/18614	0.0201346	0.0740185	0.0391932	MMP9	1
BP	GO:0042743	hydrogen peroxide metabolic process	55/18614	0.0205042	0.0740185	0.0391932	MMP3	1
BP	GO:0001541	ovarian follicle development	57/18614	0.021243	0.0740185	0.0391932	VGF	1
BP	GO:0001706	endoderm formation	57/18614	0.021243	0.0740185	0.0391932	MMP9	1
BP	GO:0007566	embryo implantation	57/18614	0.021243	0.0740185	0.0391932	MMP9	1
BP	GO:0043388	positive regulation of DNA binding	57/18614	0.021243	0.0740185	0.0391932	MMP9	1
BP	GO:0048168	regulation of neuronal synaptic plasticity	57/18614	0.021243	0.0740185	0.0391932	VGF	1
BP	GO:0001836	release of cytochrome c from mitochondria	58/18614	0.0216122	0.0740185	0.0391932	MMP9	1
BP	GO:0030225	macrophage differentiation	58/18614	0.0216122	0.0740185	0.0391932	MMP9	1
BP	GO:0061005	cell differentiation involved in kidney development	58/18614	0.0216122	0.0740185	0.0391932	MMP9	1
BP	GO:0001961	positive regulation of cytokine-mediated signaling pathway	59/18614	0.0219812	0.0740185	0.0391932	IL7	1
BP	GO:2001258	negative regulation of cation channel activity	59/18614	0.0219812	0.0740185	0.0391932	MMP9	1
BP	GO:0045453	bone resorption	64/18614	0.0238249	0.0786221	0.0416308	IL7	1
BP	GO:0048247	lymphocyte chemotaxis	64/18614	0.0238249	0.0786221	0.0416308	CCL8	1
BP	GO:0030888	regulation of B cell proliferation	65/18614	0.0241932	0.0790472	0.0418559	IL7	1
BP	GO:0060760	positive regulation of response to cytokine stimulus	66/18614	0.0245615	0.0791036	0.0418858	IL7	1
BP	GO:0038034	signal transduction in absence of ligand	67/18614	0.0249296	0.0791036	0.0418858	IL7	1
BP	GO:0097192	extrinsic apoptotic signaling pathway in absence of ligand	67/18614	0.0249296	0.0791036	0.0418858	IL7	1
BP	GO:0032722	positive regulation of chemokine production	70/18614	0.0260333	0.0818189	0.0433236	IL7	1
BP	GO:0002548	monocyte chemotaxis	71/18614	0.0264009	0.0821916	0.0435209	CCL8	1
BP	GO:0045661	regulation of myoblast differentiation	74/18614	0.0275032	0.0836111	0.0442725	IGFBP3	1
BP	GO:0010822	positive regulation of mitochondrion organization	75/18614	0.0278704	0.0836111	0.0442725	MMP9	1
BP	GO:0042058	regulation of epidermal growth factor receptor signaling pathway	75/18614	0.0278704	0.0836111	0.0442725	MMP9	1
BP	GO:0048662	negative regulation of smooth muscle cell proliferation	75/18614	0.0278704	0.0836111	0.0442725	IGFBP3	1
BP	GO:0043154	negative regulation of cysteine-type endopeptidase activity involved in apoptotic process	78/18614	0.0289712	0.0861306	0.0456066	MMP9	1
BP	GO:1903201	regulation of oxidative stress-induced cell death	79/18614	0.0293379	0.086442	0.0457715	MMP3	1
BP	GO:1901184	regulation of ERBB signaling pathway	82/18614	0.0304373	0.0876307	0.0464009	MMP9	1
BP	GO:0007492	endoderm development	83/18614	0.0308035	0.0876307	0.0464009	MMP9	1
BP	GO:0050871	positive regulation of B cell activation	83/18614	0.0308035	0.0876307	0.0464009	IL7	1
BP	GO:0051851	modulation by host of symbiont process	83/18614	0.0308035	0.0876307	0.0464009	CCL8	1
BP	GO:0032092	positive regulation of protein binding	87/18614	0.0322672	0.0891777	0.0472201	MMP9	1
BP	GO:0032413	negative regulation of ion transmembrane transporter activity	88/18614	0.0326329	0.0891777	0.0472201	MMP9	1
BP	GO:0046849	bone remodeling	88/18614	0.0326329	0.0891777	0.0472201	IL7	1
BP	GO:0051591	response to cAMP	89/18614	0.0329984	0.0891777	0.0472201	VGF	1
BP	GO:0014910	regulation of smooth muscle cell migration	90/18614	0.0333638	0.0891777	0.0472201	IGFBP3	1
BP	GO:0070098	chemokine-mediated signaling pathway	91/18614	0.0337291	0.0891777	0.0472201	CCL8	1
BP	GO:2000117	negative regulation of cysteine-type endopeptidase activity	91/18614	0.0337291	0.0891777	0.0472201	MMP9	1
BP	GO:1900407	regulation of cellular response to oxidative stress	94/18614	0.0348242	0.0891777	0.0472201	MMP3	1
BP	GO:1904705	regulation of vascular associated smooth muscle cell proliferation	95/18614	0.035189	0.0891777	0.0472201	MMP9	1
BP	GO:0014909	smooth muscle cell migration	97/18614	0.0359183	0.0891777	0.0472201	IGFBP3	1
BP	GO:1990874	vascular associated smooth muscle cell proliferation	97/18614	0.0359183	0.0891777	0.0472201	MMP9	1
BP	GO:0032642	regulation of chemokine production	98/18614	0.0362827	0.0891777	0.0472201	IL7	1
BP	GO:0032602	chemokine production	99/18614	0.0366471	0.0891777	0.0472201	IL7	1
BP	GO:0036473	cell death in response to oxidative stress	99/18614	0.0366471	0.0891777	0.0472201	MMP3	1
BP	GO:0048661	positive regulation of smooth muscle cell proliferation	99/18614	0.0366471	0.0891777	0.0472201	MMP9	1
BP	GO:1990868	response to chemokine	99/18614	0.0366471	0.0891777	0.0472201	CCL8	1
BP	GO:1990869	cellular response to chemokine	99/18614	0.0366471	0.0891777	0.0472201	CCL8	1
BP	GO:2001237	negative regulation of extrinsic apoptotic signaling pathway	99/18614	0.0366471	0.0891777	0.0472201	IL7	1
BP	GO:2001243	negative regulation of intrinsic apoptotic signaling pathway	99/18614	0.0366471	0.0891777	0.0472201	MMP9	1
BP	GO:0008585	female gonad development	102/18614	0.0377394	0.0891777	0.0472201	VGF	1
BP	GO:0046620	regulation of organ growth	102/18614	0.0377394	0.0891777	0.0472201	IL7	1
BP	GO:1904063	negative regulation of cation transmembrane transport	102/18614	0.0377394	0.0891777	0.0472201	MMP9	1
BP	GO:0010906	regulation of glucose metabolic process	103/18614	0.0381032	0.0891777	0.0472201	IGFBP3	1
BP	GO:0042100	B cell proliferation	103/18614	0.0381032	0.0891777	0.0472201	IL7	1
BP	GO:1902882	regulation of response to oxidative stress	103/18614	0.0381032	0.0891777	0.0472201	MMP3	1
BP	GO:0046545	development of primary female sexual characteristics	106/18614	0.0391941	0.0910849	0.04823	VGF	1
BP	GO:0030593	neutrophil chemotaxis	107/18614	0.0395575	0.0912865	0.0483367	CCL8	1
BP	GO:0034766	negative regulation of monoatomic ion transmembrane transport	109/18614	0.0402839	0.0914409	0.0484185	MMP9	1
BP	GO:0014812	muscle cell migration	110/18614	0.040647	0.0914409	0.0484185	IGFBP3	1
BP	GO:0045445	myoblast differentiation	110/18614	0.040647	0.0914409	0.0484185	IGFBP3	1
BP	GO:0008637	apoptotic mitochondrial changes	111/18614	0.0410099	0.0914409	0.0484185	MMP9	1
BP	GO:0071347	cellular response to interleukin-1	111/18614	0.0410099	0.0914409	0.0484185	CCL8	1
BP	GO:0007173	epidermal growth factor receptor signaling pathway	114/18614	0.0420979	0.0926154	0.0490404	MMP9	1
BP	GO:0032410	negative regulation of transporter activity	114/18614	0.0420979	0.0926154	0.0490404	MMP9	1
BP	GO:0045582	positive regulation of T cell differentiation	116/18614	0.0428227	0.0929704	0.0492283	IL7	1
BP	GO:0071346	cellular response to type II interferon	116/18614	0.0428227	0.0929704	0.0492283	CCL8	1
BP	GO:0051702	biological process involved in interaction with symbiont	118/18614	0.043547	0.093925	0.0497338	CCL8	1
BP	GO:0051101	regulation of DNA binding	120/18614	0.0442709	0.0948661	0.0502321	MMP9	1
BP	GO:0046660	female sex differentiation	122/18614	0.0449942	0.0951801	0.0503984	VGF	1
BP	GO:0072676	lymphocyte migration	122/18614	0.0449942	0.0951801	0.0503984	CCL8	1
BP	GO:0001704	formation of primary germ layer	127/18614	0.0468006	0.0970755	0.051402	MMP9	1
BP	GO:1990266	neutrophil migration	128/18614	0.0471615	0.0970755	0.051402	CCL8	1
BP	GO:0019079	viral genome replication	129/18614	0.0475223	0.0970755	0.051402	CCL8	1
BP	GO:0046683	response to organophosphorus	129/18614	0.0475223	0.0970755	0.051402	VGF	1
BP	GO:0045621	positive regulation of lymphocyte differentiation	130/18614	0.047883	0.0970755	0.051402	IL7	1
BP	GO:0050864	regulation of B cell activation	130/18614	0.047883	0.0970755	0.051402	IL7	1
BP	GO:0038127	ERBB signaling pathway	131/18614	0.0482436	0.0970755	0.051402	MMP9	1
BP	GO:0071621	granulocyte chemotaxis	131/18614	0.0482436	0.0970755	0.051402	CCL8	1
BP	GO:0034341	response to type II interferon	139/18614	0.051124	0.102248	0.0541409	CCL8	1
BP	GO:0043271	negative regulation of monoatomic ion transport	140/18614	0.0514835	0.102347	0.0541931	MMP9	1
BP	GO:0070555	response to interleukin-1	141/18614	0.0518429	0.102444	0.0542447	CCL8	1
BP	GO:0051384	response to glucocorticoid	142/18614	0.0522022	0.10254	0.0542955	PAPPA	1
BP	GO:0014074	response to purine-containing compound	143/18614	0.0525614	0.102635	0.0543456	VGF	1
BP	GO:0050671	positive regulation of lymphocyte proliferation	145/18614	0.0532793	0.103425	0.0547639	IL7	1
BP	GO:0032946	positive regulation of mononuclear cell proliferation	148/18614	0.0543555	0.10468	0.0554287	IL7	1
BP	GO:2000377	regulation of reactive oxygen species metabolic process	150/18614	0.0550723	0.10468	0.0554287	MMP3	1
BP	GO:0010821	regulation of mitochondrion organization	151/18614	0.0554305	0.10468	0.0554287	MMP9	1
BP	GO:0010675	regulation of cellular carbohydrate metabolic process	152/18614	0.0557886	0.10468	0.0554287	IGFBP3	1
BP	GO:0034614	cellular response to reactive oxygen species	152/18614	0.0557886	0.10468	0.0554287	MMP9	1
BP	GO:0030183	B cell differentiation	153/18614	0.0561466	0.10468	0.0554287	IL7	1
BP	GO:0034763	negative regulation of transmembrane transport	153/18614	0.0561466	0.10468	0.0554287	MMP9	1
BP	GO:2001257	regulation of cation channel activity	154/18614	0.0565045	0.104756	0.0554687	MMP9	1
BP	GO:0097530	granulocyte migration	156/18614	0.05722	0.104903	0.0555469	CCL8	1
BP	GO:2001236	regulation of extrinsic apoptotic signaling pathway	156/18614	0.05722	0.104903	0.0555469	IL7	1
BP	GO:0010951	negative regulation of endopeptidase activity	160/18614	0.0586494	0.10693	0.05662	MMP9	1
BP	GO:0001959	regulation of cytokine-mediated signaling pathway	165/18614	0.0604336	0.107853	0.057109	IL7	1
BP	GO:0048639	positive regulation of developmental growth	165/18614	0.0604336	0.107853	0.057109	IL7	1
BP	GO:0030856	regulation of epithelial cell differentiation	166/18614	0.0607901	0.107853	0.057109	MMP9	1
BP	GO:0031960	response to corticosteroid	166/18614	0.0607901	0.107853	0.057109	PAPPA	1
BP	GO:0070665	positive regulation of leukocyte proliferation	166/18614	0.0607901	0.107853	0.057109	IL7	1
BP	GO:2001242	regulation of intrinsic apoptotic signaling pathway	173/18614	0.0632823	0.111675	0.0591324	MMP9	1
BP	GO:0010634	positive regulation of epithelial cell migration	176/18614	0.0643487	0.112355	0.0594925	MMP9	1
BP	GO:0051099	positive regulation of binding	176/18614	0.0643487	0.112355	0.0594925	MMP9	1
BP	GO:0060759	regulation of response to cytokine stimulus	177/18614	0.0647039	0.11238	0.0595061	IL7	1
BP	GO:0035265	organ growth	180/18614	0.0657689	0.112547	0.0595943	IL7	1
BP	GO:0045580	regulation of T cell differentiation	180/18614	0.0657689	0.112547	0.0595943	IL7	1
BP	GO:0048771	tissue remodeling	181/18614	0.0661236	0.112547	0.0595943	IL7	1
BP	GO:0006109	regulation of carbohydrate metabolic process	183/18614	0.0668328	0.112547	0.0595943	IGFBP3	1
BP	GO:0009266	response to temperature stimulus	183/18614	0.0668328	0.112547	0.0595943	VGF	1
BP	GO:1902107	positive regulation of leukocyte differentiation	184/18614	0.0671872	0.112547	0.0595943	IL7	1
BP	GO:1903708	positive regulation of hemopoiesis	184/18614	0.0671872	0.112547	0.0595943	IL7	1
BP	GO:0006006	glucose metabolic process	187/18614	0.0682498	0.11375	0.0602311	IGFBP3	1
BP	GO:0031334	positive regulation of protein-containing complex assembly	195/18614	0.0710781	0.117854	0.0624046	MMP3	1
BP	GO:0007369	gastrulation	196/18614	0.0714312	0.117854	0.0624046	MMP9	1
BP	GO:0030073	insulin secretion	197/18614	0.0717841	0.117854	0.0624046	VGF	1
BP	GO:0071248	cellular response to metal ion	200/18614	0.0728421	0.118973	0.0629969	MMP9	1
BP	GO:0043393	regulation of protein binding	201/18614	0.0731946	0.118973	0.0629969	MMP9	1
BP	GO:0071674	mononuclear cell migration	202/18614	0.0735469	0.118973	0.0629969	CCL8	1
BP	GO:0043281	regulation of cysteine-type endopeptidase activity involved in apoptotic process	204/18614	0.0742513	0.11951	0.0632813	MMP9	1
BP	GO:0000302	response to reactive oxygen species	205/18614	0.0746033	0.11951	0.0632813	MMP9	1
BP	GO:1901654	response to ketone	208/18614	0.0756586	0.120593	0.0638546	PAPPA	1
BP	GO:0048167	regulation of synaptic plasticity	209/18614	0.0760101	0.120593	0.0638546	VGF	1
BP	GO:0045619	regulation of lymphocyte differentiation	212/18614	0.077064	0.12168	0.0644303	IL7	1
BP	GO:0070374	positive regulation of ERK1 and ERK2 cascade	222/18614	0.0805697	0.126609	0.0670404	CCL8	1
BP	GO:0002573	myeloid leukocyte differentiation	227/18614	0.0823182	0.127478	0.0675003	MMP9	1
BP	GO:0097191	extrinsic apoptotic signaling pathway	227/18614	0.0823182	0.127478	0.0675003	IL7	1
BP	GO:0008406	gonad development	228/18614	0.0826676	0.127478	0.0675003	VGF	1
BP	GO:0019318	hexose metabolic process	228/18614	0.0826676	0.127478	0.0675003	IGFBP3	1
BP	GO:0045137	development of primary sexual characteristics	233/18614	0.0844127	0.128912	0.0682595	VGF	1
BP	GO:2000116	regulation of cysteine-type endopeptidase activity	234/18614	0.0847614	0.128912	0.0682595	MMP9	1
BP	GO:0071356	cellular response to tumor necrosis factor	235/18614	0.0851099	0.128912	0.0682595	CCL8	1
BP	GO:0010466	negative regulation of peptidase activity	236/18614	0.0854584	0.128912	0.0682595	MMP9	1
BP	GO:0072593	reactive oxygen species metabolic process	237/18614	0.0858067	0.128912	0.0682595	MMP3	1
BP	GO:0030072	peptide hormone secretion	238/18614	0.086155	0.128912	0.0682595	VGF	1
BP	GO:0050670	regulation of lymphocyte proliferation	239/18614	0.0865031	0.128912	0.0682595	IL7	1
BP	GO:0030595	leukocyte chemotaxis	241/18614	0.087199	0.128912	0.0682595	CCL8	1
BP	GO:0097529	myeloid leukocyte migration	241/18614	0.087199	0.128912	0.0682595	CCL8	1
BP	GO:0002790	peptide secretion	243/18614	0.0878944	0.128912	0.0682595	VGF	1
BP	GO:0032944	regulation of mononuclear cell proliferation	243/18614	0.0878944	0.128912	0.0682595	IL7	1
BP	GO:0042593	glucose homeostasis	248/18614	0.089631	0.129596	0.0686221	VGF	1
BP	GO:0033500	carbohydrate homeostasis	249/18614	0.0899779	0.129596	0.0686221	VGF	1
BP	GO:0050870	positive regulation of T cell activation	249/18614	0.0899779	0.129596	0.0686221	IL7	1
BP	GO:0001649	osteoblast differentiation	250/18614	0.0903248	0.129596	0.0686221	IGFBP3	1
BP	GO:0006959	humoral immune response	250/18614	0.0903248	0.129596	0.0686221	IL7	1
BP	GO:0050730	regulation of peptidyl-tyrosine phosphorylation	255/18614	0.0920574	0.131216	0.0694794	IL7	1
BP	GO:0005996	monosaccharide metabolic process	256/18614	0.0924036	0.131216	0.0694794	IGFBP3	1
BP	GO:0034612	response to tumor necrosis factor	257/18614	0.0927497	0.131216	0.0694794	CCL8	1
BP	GO:0045927	positive regulation of growth	258/18614	0.0930956	0.131216	0.0694794	IL7	1
BP	GO:0015833	peptide transport	259/18614	0.0934415	0.131216	0.0694794	VGF	1
BP	GO:0001894	tissue homeostasis	263/18614	0.0948237	0.132033	0.0699122	IL7	1
BP	GO:0060249	anatomical structure homeostasis	263/18614	0.0948237	0.132033	0.0699122	IL7	1
BP	GO:0070663	regulation of leukocyte proliferation	268/18614	0.096549	0.13387	0.0708852	IL7	1
BP	GO:0032868	response to insulin	272/18614	0.0979272	0.134563	0.0712516	VGF	1
BP	GO:0043547	positive regulation of GTPase activity	272/18614	0.0979272	0.134563	0.0712516	CCL8	1
BP	GO:1903039	positive regulation of leukocyte cell-cell adhesion	273/18614	0.0982715	0.134563	0.0712516	IL7	1
BP	GO:0042113	B cell activation	276/18614	0.0993036	0.135414	0.0717025	IL7	1
BP	GO:0032412	regulation of monoatomic ion transmembrane transporter activity	278/18614	0.0999911	0.13579	0.0719018	MMP9	1
BP	GO:0045165	cell fate commitment	281/18614	0.101022	0.136627	0.072345	IL7	1
BP	GO:0007548	sex differentiation	283/18614	0.101708	0.136994	0.0725393	VGF	1
BP	GO:0022898	regulation of transmembrane transporter activity	289/18614	0.103764	0.13909	0.0736489	MMP9	1
BP	GO:0044262	cellular carbohydrate metabolic process	290/18614	0.104107	0.13909	0.0736489	IGFBP3	1
BP	GO:0010632	regulation of epithelial cell migration	295/18614	0.105817	0.140805	0.0745569	MMP9	1
BP	GO:0030217	T cell differentiation	300/18614	0.107524	0.141242	0.0747882	IL7	1
BP	GO:0048608	reproductive structure development	301/18614	0.107865	0.141242	0.0747882	VGF	1
BP	GO:0097193	intrinsic apoptotic signaling pathway	301/18614	0.107865	0.141242	0.0747882	MMP9	1
BP	GO:0006874	intracellular calcium ion homeostasis	303/18614	0.108547	0.141242	0.0747882	CCL8	1
BP	GO:0048872	homeostasis of number of cells	304/18614	0.108888	0.141242	0.0747882	IL7	1
BP	GO:0046879	hormone secretion	305/18614	0.109229	0.141242	0.0747882	VGF	1
BP	GO:0061458	reproductive system development	305/18614	0.109229	0.141242	0.0747882	VGF	1
BP	GO:0046651	lymphocyte proliferation	306/18614	0.109569	0.141242	0.0747882	IL7	1
BP	GO:0001822	kidney development	310/18614	0.11093	0.141322	0.0748307	MMP9	1
BP	GO:0060326	cell chemotaxis	312/18614	0.11161	0.141322	0.0748307	CCL8	1
BP	GO:0032943	mononuclear cell proliferation	313/18614	0.11195	0.141322	0.0748307	IL7	1
BP	GO:0044403	biological process involved in symbiotic interaction	313/18614	0.11195	0.141322	0.0748307	CCL8	1
BP	GO:0042742	defense response to bacterium	314/18614	0.11229	0.141322	0.0748307	VGF	1
BP	GO:0009914	hormone transport	315/18614	0.112629	0.141322	0.0748307	VGF	1
BP	GO:0070372	regulation of ERK1 and ERK2 cascade	315/18614	0.112629	0.141322	0.0748307	CCL8	1
BP	GO:1902105	regulation of leukocyte differentiation	319/18614	0.113986	0.14172	0.0750415	IL7	1
BP	GO:0019058	viral life cycle	320/18614	0.114325	0.14172	0.0750415	CCL8	1
BP	GO:0072001	renal system development	320/18614	0.114325	0.14172	0.0750415	MMP9	1
BP	GO:0022409	positive regulation of cell-cell adhesion	321/18614	0.114664	0.14172	0.0750415	IL7	1
BP	GO:0032409	regulation of transporter activity	324/18614	0.11568	0.142442	0.0754239	MMP9	1
BP	GO:0051251	positive regulation of lymphocyte activation	327/18614	0.116695	0.142513	0.0754615	IL7	1
BP	GO:0055074	calcium ion homeostasis	327/18614	0.116695	0.142513	0.0754615	CCL8	1
BP	GO:0048638	regulation of developmental growth	328/18614	0.117033	0.142513	0.0754615	IL7	1
BP	GO:0045861	negative regulation of proteolysis	330/18614	0.117709	0.142694	0.0755574	MMP9	1
BP	GO:0062012	regulation of small molecule metabolic process	331/18614	0.118047	0.142694	0.0755574	IGFBP3	1
BP	GO:0052548	regulation of endopeptidase activity	336/18614	0.119734	0.144206	0.0763577	MMP9	1
BP	GO:0048545	response to steroid hormone	339/18614	0.120745	0.144651	0.0765933	PAPPA	1
BP	GO:0001933	negative regulation of protein phosphorylation	341/18614	0.121419	0.144651	0.0765933	IGFBP3	1
BP	GO:0070371	ERK1 and ERK2 cascade	341/18614	0.121419	0.144651	0.0765933	CCL8	1
BP	GO:0051346	negative regulation of hydrolase activity	345/18614	0.122764	0.145603	0.0770975	MMP9	1
BP	GO:1904062	regulation of monoatomic cation transmembrane transport	346/18614	0.123101	0.145603	0.0770975	MMP9	1
BP	GO:0070661	leukocyte proliferation	348/18614	0.123773	0.14575	0.0771754	IL7	1
BP	GO:0042886	amide transport	349/18614	0.124108	0.14575	0.0771754	VGF	1
BP	GO:0006887	exocytosis	351/18614	0.12478	0.146019	0.0773177	CCL8	1
BP	GO:0043087	regulation of GTPase activity	364/18614	0.129132	0.149538	0.0791811	CCL8	1
BP	GO:0010038	response to metal ion	367/18614	0.130134	0.149538	0.0791811	MMP9	1
BP	GO:0051098	regulation of binding	369/18614	0.130801	0.149538	0.0791811	MMP9	1
BP	GO:0018108	peptidyl-tyrosine phosphorylation	370/18614	0.131135	0.149538	0.0791811	IL7	1
BP	GO:0010631	epithelial cell migration	371/18614	0.131468	0.149538	0.0791811	MMP9	1
BP	GO:0018212	peptidyl-tyrosine modification	372/18614	0.131801	0.149538	0.0791811	IL7	1
BP	GO:0009306	protein secretion	373/18614	0.132134	0.149538	0.0791811	VGF	1
BP	GO:0035592	establishment of protein localization to extracellular region	374/18614	0.132467	0.149538	0.0791811	VGF	1
BP	GO:0090132	epithelium migration	374/18614	0.132467	0.149538	0.0791811	MMP9	1
BP	GO:0030336	negative regulation of cell migration	375/18614	0.1328	0.149538	0.0791811	IGFBP3	1
BP	GO:0002696	positive regulation of leukocyte activation	377/18614	0.133466	0.149538	0.0791811	IL7	1
BP	GO:0050863	regulation of T cell activation	377/18614	0.133466	0.149538	0.0791811	IL7	1
BP	GO:1903037	regulation of leukocyte cell-cell adhesion	378/18614	0.133798	0.149538	0.0791811	IL7	1
BP	GO:0090130	tissue migration	379/18614	0.134131	0.149538	0.0791811	MMP9	1
BP	GO:0071692	protein localization to extracellular region	382/18614	0.135128	0.150006	0.0794289	VGF	1
BP	GO:0042326	negative regulation of phosphorylation	383/18614	0.13546	0.150006	0.0794289	IGFBP3	1
BP	GO:2000146	negative regulation of cell motility	390/18614	0.137781	0.152066	0.0805199	IGFBP3	1
BP	GO:0050900	leukocyte migration	393/18614	0.138774	0.152507	0.0807535	CCL8	1
BP	GO:0050867	positive regulation of cell activation	394/18614	0.139105	0.152507	0.0807535	IL7	1
BP	GO:0009615	response to virus	408/18614	0.143726	0.156892	0.083075	CCL8	1
BP	GO:0043254	regulation of protein-containing complex assembly	409/18614	0.144055	0.156892	0.083075	MMP3	1
BP	GO:0007159	leukocyte cell-cell adhesion	415/18614	0.146028	0.157998	0.0836607	IL7	1
BP	GO:1903706	regulation of hemopoiesis	415/18614	0.146028	0.157998	0.0836607	IL7	1
BP	GO:0001558	regulation of cell growth	420/18614	0.147669	0.158614	0.0839872	IGFBP3	1
BP	GO:0030099	myeloid cell differentiation	421/18614	0.147997	0.158614	0.0839872	MMP9	1
BP	GO:0030098	lymphocyte differentiation	422/18614	0.148325	0.158614	0.0839872	IL7	1
BP	GO:0052547	regulation of peptidase activity	425/18614	0.149308	0.158614	0.0839872	MMP9	1
BP	GO:0016032	viral process	426/18614	0.149635	0.158614	0.0839872	CCL8	1
BP	GO:0040013	negative regulation of locomotion	427/18614	0.149963	0.158614	0.0839872	IGFBP3	1
BP	GO:0043434	response to peptide hormone	427/18614	0.149963	0.158614	0.0839872	VGF	1
BP	GO:0001503	ossification	429/18614	0.150617	0.158797	0.0840841	IGFBP3	1
BP	GO:0010720	positive regulation of cell development	432/18614	0.151597	0.159322	0.084362	IL7	1
BP	GO:0045936	negative regulation of phosphate metabolic process	439/18614	0.153882	0.161039	0.0852713	IGFBP3	1
BP	GO:0010563	negative regulation of phosphorus metabolic process	440/18614	0.154207	0.161039	0.0852713	IGFBP3	1
BP	GO:0006816	calcium ion transport	455/18614	0.159083	0.165607	0.0876897	CCL8	1
BP	GO:1903131	mononuclear cell differentiation	474/18614	0.165224	0.171458	0.0907882	IL7	1
BP	GO:0031667	response to nutrient levels	477/18614	0.16619	0.171604	0.0908654	VGF	1
BP	GO:0034765	regulation of monoatomic ion transmembrane transport	478/18614	0.166511	0.171604	0.0908654	MMP9	1
BP	GO:0045785	positive regulation of cell adhesion	482/18614	0.167798	0.171604	0.0908654	IL7	1
BP	GO:0023061	signal release	483/18614	0.168119	0.171604	0.0908654	VGF	1
BP	GO:0051051	negative regulation of transport	483/18614	0.168119	0.171604	0.0908654	MMP9	1
BP	GO:0050804	modulation of chemical synaptic transmission	487/18614	0.169403	0.171604	0.0908654	VGF	1
BP	GO:0050673	epithelial cell proliferation	488/18614	0.169724	0.171604	0.0908654	IGFBP3	1
BP	GO:0099177	regulation of trans-synaptic signaling	488/18614	0.169724	0.171604	0.0908654	VGF	1
BP	GO:0001819	positive regulation of cytokine production	489/18614	0.170044	0.171604	0.0908654	IL7	1
BP	GO:0022407	regulation of cell-cell adhesion	491/18614	0.170685	0.171726	0.0909299	IL7	1
BP	GO:0016049	cell growth	495/18614	0.171966	0.172286	0.0912263	IGFBP3	1
BP	GO:0001667	ameboidal-type cell migration	496/18614	0.172286	0.172286	0.0912263	MMP9	1
CC	GO:0005788	endoplasmic reticulum lumen	312/19518	0.00507258	0.044121	0.0278659	IGFBP3/VGF	2
CC	GO:0062023	collagen-containing extracellular matrix	415/19518	0.00882419	0.044121	0.0278659	IL7/MMP9	2
CC	GO:1904724	tertiary granule lumen	55/19518	0.0195624	0.065208	0.041184	MMP9	1
CC	GO:1904813	ficolin-1-rich granule lumen	124/19518	0.0436397	0.107503	0.0678963	MMP9	1
CC	GO:0070820	tertiary granule	164/19518	0.057364	0.107503	0.0678963	MMP9	1
CC	GO:0101002	ficolin-1-rich granule	185/19518	0.0645015	0.107503	0.0678963	MMP9	1
CC	GO:0030667	secretory granule membrane	319/19518	0.108964	0.155663	0.0983133	VGF	1
CC	GO:0098978	glutamatergic synapse	410/19518	0.138115	0.158712	0.100239	VGF	1
CC	GO:0030133	transport vesicle	425/19518	0.142841	0.158712	0.100239	VGF	1
CC	GO:0043025	neuronal cell body	500/19518	0.166138	0.166138	0.104929	VGF	1
MF	GO:0004222	metalloendopeptidase activity	122/18369	9.81183e-06	0.000304167	5.16412e-05	MMP3/MMP9/PAPPA	3
MF	GO:0008237	metallopeptidase activity	197/18369	4.11938e-05	0.000638505	0.000108405	MMP3/MMP9/PAPPA	3
MF	GO:0004175	endopeptidase activity	428/18369	0.000410017	0.00423684	0.000719328	MMP3/MMP9/PAPPA	3
MF	GO:0048018	receptor ligand activity	497/18369	0.000635323	0.00492375	0.000835951	CCL8/IL7/VGF	3
MF	GO:0008083	growth factor activity	160/18369	0.00153857	0.00872052	0.00148056	IL7/VGF	2
MF	GO:0004252	serine-type endopeptidase activity	170/18369	0.00173438	0.00872052	0.00148056	MMP3/MMP9	2
MF	GO:0008236	serine-type peptidase activity	190/18369	0.00215995	0.00872052	0.00148056	MMP3/MMP9	2
MF	GO:0017171	serine hydrolase activity	194/18369	0.00225046	0.00872052	0.00148056	MMP3/MMP9	2
MF	GO:0005125	cytokine activity	235/18369	0.00328058	0.0112998	0.00191847	CCL8/IL7	2
MF	GO:0005126	cytokine receptor binding	270/18369	0.00430539	0.0133467	0.00226599	CCL8/IL7	2
MF	GO:0031994	insulin-like growth factor I binding	13/18369	0.0049443	0.0139339	0.00236569	IGFBP3	1
MF	GO:0072542	protein phosphatase activator activity	16/18369	0.00608231	0.0157126	0.00266768	IGFBP3	1
MF	GO:0005520	insulin-like growth factor binding	19/18369	0.00721921	0.017215	0.00292276	IGFBP3	1
MF	GO:0016004	phospholipase activator activity	22/18369	0.00835499	0.0185003	0.00314097	CCL8	1
MF	GO:0060229	lipase activator activity	25/18369	0.00948965	0.0191185	0.00324593	CCL8	1
MF	GO:0019211	phosphatase activator activity	26/18369	0.00986763	0.0191185	0.00324593	IGFBP3	1
MF	GO:0005184	neuropeptide hormone activity	30/18369	0.0113783	0.0202458	0.00343732	VGF	1
MF	GO:0001968	fibronectin binding	31/18369	0.0117556	0.0202458	0.00343732	IGFBP3	1
MF	GO:0008009	chemokine activity	49/18369	0.018527	0.0292981	0.00497421	CCL8	1
MF	GO:0048020	CCR chemokine receptor binding	50/18369	0.018902	0.0292981	0.00497421	CCL8	1
MF	GO:0005518	collagen binding	66/18369	0.0248856	0.0367359	0.00623699	MMP9	1
MF	GO:0042379	chemokine receptor binding	74/18369	0.0278657	0.0392652	0.00666642	CCL8	1
MF	GO:0019888	protein phosphatase regulator activity	92/18369	0.0345422	0.0465569	0.0079044	IGFBP3	1
MF	GO:0019208	phosphatase regulator activity	111/18369	0.041547	0.0536649	0.00911119	IGFBP3	1
MF	GO:0005179	hormone activity	122/18369	0.0455825	0.0565223	0.00959632	VGF	1
MF	GO:0019838	growth factor binding	132/18369	0.0492385	0.0586267	0.0099536	IGFBP3	1
MF	GO:0070851	growth factor receptor binding	137/18369	0.051062	0.0586267	0.0099536	IL7	1
MF	GO:0008201	heparin binding	168/18369	0.0623008	0.0689758	0.0117107	CCL8	1
MF	GO:0005539	glycosaminoglycan binding	232/18369	0.085143	0.0910149	0.0154524	CCL8	1
MF	GO:1901681	sulfur compound binding	269/18369	0.0981298	0.101401	0.0172158	CCL8	1
MF	GO:0001664	G protein-coupled receptor binding	289/18369	0.105084	0.105084	0.017841	CCL8	1
