# Supplementary material for: Identification and verification of biomarkers related to senescence-associated secretory phenotype in type 2 diabetes
Source: Research Square preprint supplement (doi:10.21203/rs.3.rs-7839443/v1), 2025-11-11
Supplement: Supplementary file 4 [file ac1a0d7af56e30ca53a14011.xlsx]

## Sheet: Sheet1
Online Resource 1. The complete list of 83 SASP-RGs collected from literature.
Gene(human)	Classification	State
ANG	Miscellaneous	Secreted
ANGPT1	Intercellular signal molecule	Secreted
ANGPTL4	Intercellular signal molecule	Secreted
BMP2	Growth factor	Secreted
BMP6	Growth factor	Secreted
C3	Protease inhibitors	Secreted
CCL1	Cytokine/Chemokine	Secreted
CCL13	Cytokine/Chemokine	Secreted
CCL16	Cytokine/Chemokine	Secreted
CCL2	Cytokine/Chemokine	Secreted
CCL20	Cytokine/Chemokine	Secreted
CCL24	Cytokine/Chemokine	Secreted
CCL26	Cytokine/Chemokine	Secreted
CCL3	Cytokine/Chemokine	Secreted
CCL3L1	Cytokine/Chemokine	Secreted
CCL4	Cytokine/Chemokine	Secreted
CCL5	Cytokine/Chemokine	Secreted
CCL7	Cytokine/Chemokine	Secreted
CCL8	Cytokine/Chemokine	Secreted
CD55	Miscellaneous	Secreted
CSF1	Cytokine/Chemokine	Secreted
CSF2	Cytokine/Chemokine	Secreted
CST4	Protease inhibitors	Secreted
CTSB	(Metallo-)proteases	Secreted
CXCL1	Cytokine/Chemokine	Secreted
CXCL10	Cytokine/Chemokine	Secreted
CXCL12	Cytokine/Chemokine	Secreted
CXCL16	Cytokine/Chemokine	Secreted
CXCL2	Cytokine/Chemokine	Secreted
CXCL3	Cytokine/Chemokine	Secreted
CXCL8	Cytokine/Chemokine	Secreted
DKK1	Intercellular signal molecule	Secreted
EDN1	Intercellular signal molecule	Secreted
EREG	Growth factor	Secreted
ESM1	Intercellular signal molecule	Secreted
FGF1	Growth factor	Secreted
FGF2	Growth factor	Secreted
FGF7	Growth factor	Secreted
GDF15	Growth factor	Secreted
HGF	(Metallo-)proteases	Secreted
IGF1	Growth factor	Secreted
IGFBP1	Protease inhibitors	Secreted
IGFBP2	Protease inhibitors	Secreted
IGFBP3	Protease inhibitors	Secreted
IGFBP4	Protease inhibitors	Secreted
IGFBP5	Protease inhibitors	Secreted
IGFBP6	Protease inhibitors	Secreted
IGFBP7	Miscellaneous	Secreted
IL10	Cytokine/Chemokine	Secreted
IL13	Cytokine/Chemokine	Secreted
IL15	Cytokine/Chemokine	Secreted
IL18	Cytokine/Chemokine	Secreted
IL1A	Cytokine/Chemokine	Secreted
IL1B	Cytokine/Chemokine	Secreted
IL2	Cytokine/Chemokine	Secreted
IL32	Cytokine/Chemokine	Secreted
IL6	Cytokine/Chemokine	Secreted
IL7	Cytokine/Chemokine	Secreted
INHA	Growth factor	Secreted
MIF	Protein modifying enzymes	Secreted
MMP1	(Metallo-)proteases	Secreted
MMP10	(Metallo-)proteases	Secreted
MMP12	(Metallo-)proteases	Secreted
MMP13	(Metallo-)proteases	Secreted
MMP2	(Metallo-)proteases	Secreted
MMP3	(Metallo-)proteases	Secreted
MMP9	(Metallo-)proteases	Secreted
NRG1	Growth factor	Secreted
PAPPA	(Metallo-)proteases	Secreted
PGF	Growth factor	Secreted
PLAT	(Metallo-)proteases	Secreted
PLAU	(Metallo-)proteases	Secreted
SEMA3F	Intercellular signal molecule	Secreted
SERPINE1	Protease inhibitors	Secreted
SERPINE2	Protease inhibitors	Secreted
SPP1	Cytokine/Chemokine	Secreted
SPX	Intercellular signal molecule	Secreted
TIMP2	Protease inhibitors	Secreted
TNF	Cytokine/Chemokine	Secreted
VEGFA	Growth factor	Secreted
VEGFC	Growth factor	Secreted
VGF	Intercellular signal molecule	Secreted
WNT16	Intercellular signal molecule	Secreted
