# Supplementary material for: Identification and verification of biomarkers related to senescence-associated secretory phenotype in type 2 diabetes
Source: Research Square preprint supplement (doi:10.21203/rs.3.rs-7839443/v1), 2025-11-11
Supplement: Supplementary file 5 [file c18b1e526023299989df841a.xlsx]

## Sheet: MMP9_GSEA_result
ID	Description	setSize	enrichmentScore	NES	pvalue	p.adjust	qvalue	rank	leading_edge	core_enrichment
HALLMARK_MYC_TARGETS_V1	HALLMARK_MYC_TARGETS_V1	188	-0.671361	-3.49006	1e-10	8.33333e-10	4.5614e-10	3597	tags=66%, list=19%, signal=54%	EIF2S2/RPS10/SRSF1/PSMD7/EEF1B2/EIF4E/RPS3/EIF1AX/GNL3/NOP16/HDAC2/PPM1G/EIF4G2/UBE2L3/C1QBP/TARDBP/PRPF31/CSTF2/NPM1/HNRNPD/NAP1L1/RNPS1/RPS6/LSM2/SET/EIF3D/CCT4/RPL34/ODC1/FBL/SERBP1/SMARCC1/CDK4/CUL1/RPL22/SNRPA/RPL6/USP1/PSMA2/HNRNPA2B1/PHB2/KPNA2/NCBP1/RUVBL2/LSM7/XPO1/PA2G4/RPL14/STARD7/PTGES3/NDUFAB1/SNRPD2/MCM2/COX5A/ACP1/HDDC2/GOT2/APEX1/LDHA/CCT3/ABCE1/NHP2/HPRT1/HNRNPA1/PSMA4/SSBP1/MRP…
HALLMARK_OXIDATIVE_PHOSPHORYLATION	HALLMARK_OXIDATIVE_PHOSPHORYLATION	183	-0.52232	-2.71041	1e-10	8.33333e-10	4.5614e-10	3663	tags=49%, list=20%, signal=39%	UQCRC2/NDUFA3/CPT1A/GRPEL1/PHYH/NDUFA7/VDAC2/NDUFS1/COX7B/MRPS15/ISCA1/ECHS1/IMMT/NDUFB4/IDH3A/UQCRFS1/NDUFS3/MDH2/HSD17B10/MTRR/MRPS30/COX6A1/NDUFS6/UQCRH/MPC1/ETFA/ALDH6A1/MRPL34/ECH1/UQCRQ/PHB2/NDUFB7/COX7A2L/SUPV3L1/UQCR10/NDUFAB1/FDX1/TIMM9/COX5A/ACADSB/COX17/GOT2/LDHA/SLC25A5/DLAT/NDUFB8/ACAA2/LRPPRC/AFG3L2/COX7A2/ATP1B1/FXN/MRPS22/NNT/COX7C/MRPL11/SLC25A12/MRPL35/COX11/NDUFA8/SUCLA2/BDH2/P…
HALLMARK_INTERFERON_ALPHA_RESPONSE	HALLMARK_INTERFERON_ALPHA_RESPONSE	93	-0.564635	-2.63898	1e-10	8.33333e-10	4.5614e-10	4760	tags=59%, list=26%, signal=44%	PSME1/EIF2AK2/OAS1/GBP2/DHX58/PSMB9/IFI35/RIPK2/ISG20/TDRD7/PLSCR1/ELF1/GBP4/SLC25A28/BST2/MX1/RSAD2/CMPK2/TAP1/UBE2L6/IFI44L/LY6E/IFI44/CNP/ISG15/STAT2/NUB1/PARP14/IFI27/EPSTI1/IL15/IFIH1/TRIM5/MOV10/SAMD9/LPAR6/LAMP3/HERC6/PARP12/CMTR1/LAP3/SAMD9L/PSMA3/DDX60/OASL/IL7/RTP4/TRIM26/PNPT1/CXCL10/CD47/TRIM14/CXCL11/NCOA7/USP18
HALLMARK_INTERFERON_GAMMA_RESPONSE	HALLMARK_INTERFERON_GAMMA_RESPONSE	194	-0.477409	-2.49922	1e-10	8.33333e-10	4.5614e-10	4760	tags=52%, list=26%, signal=39%	PSME1/LCP2/EIF2AK2/BANK1/CASP7/IRF8/IFIT1/DHX58/VCAM1/PSMB9/CASP3/IFI35/RIPK2/ISG20/SAMHD1/TDRD7/PLSCR1/CD38/CD274/CMKLR1/NOD1/CDKN1A/GBP4/SLC25A28/BST2/MX1/PLA2G4A/RSAD2/CMPK2/TAP1/SSPN/LYSMD2/UBE2L6/TNFAIP6/IFI44L/OAS3/SERPING1/LY6E/HLA-DMA/IFI44/PTPN1/ISG15/CFH/STAT2/ISOC1/HLA-DQA1/PARP14/ST3GAL5/PSMA2/PML/RNF213/SOCS1/IFI27/EPSTI1/IL15/NLRC5/IFIH1/ITGB7/XAF1/CCL5/PNP/SRI/HERC6/PARP12/CMTR1/LA…
HALLMARK_E2F_TARGETS	HALLMARK_E2F_TARGETS	192	-0.477014	-2.48766	1e-10	8.33333e-10	4.5614e-10	4500	tags=51%, list=24%, signal=39%	SMC3/PMS2/NME1/TIMELESS/TUBB/MYBL2/PAICS/DUT/CCP110/TK1/NBN/ASF1A/LIG1/CDKN1A/SPAG5/E2F8/PSIP1/AURKB/IPO7/SRSF1/RAD51C/CSE1L/POLE4/TCF19/HNRNPD/DCTPP1/RFC3/NAP1L1/CHEK1/MSH2/CDK4/AURKA/DNMT1/DONSON/USP1/RAD51AP1/KPNA2/PTTG1/GINS1/AK2/TUBG1/DLGAP5/PRPS1/RPA1/XPO1/PA2G4/NASP/MCM3/SMC1A/MCM2/LYAR/ZW10/BRMS1L/RBBP7/GINS3/RPA3/RAD1/SMC4/RACGAP1/DEK/HUS1/NOLC1/MLH1/GSPT1/EXOSC8/CDC25B/PRDX4/ATAD2/EED/U…
HALLMARK_G2M_CHECKPOINT	HALLMARK_G2M_CHECKPOINT	188	-0.437739	-2.27558	1e-10	8.33333e-10	4.5614e-10	3242	tags=39%, list=17%, signal=33%	NEK2/ATRX/RBL1/SMAD3/HNRNPD/EGF/ODC1/ABL1/CHEK1/KIF20B/NUSAP1/SMARCC1/CDK4/AURKA/CUL1/CENPF/EXO1/CASP8AP2/CDC27/WRN/KPNA2/PTTG1/PML/XPO1/NASP/PBK/MCM3/CCNT1/SLC7A5/PRC1/SMC1A/MCM2/DKC1/KIF11/SLC38A1/TTK/SMC4/PRPF4B/SS18/RACGAP1/HUS1/MT2A/NOLC1/PTTG3P/ORC5/GSPT1/CDC25B/MTF2/PURA/TMPO/HSPA8/MNAT1/DTYMK/SMC2/G3BP1/CKS1B/NCL/DBF4/SLC12A2/MCM6/CKS2/CUL4A/EWSR1/CUL5/SYNCRIP/TRA2B/STMN1/BARD1/SFPQ/BUB3/…
HALLMARK_UNFOLDED_PROTEIN_RESPONSE	HALLMARK_UNFOLDED_PROTEIN_RESPONSE	104	-0.474443	-2.25677	1.43793e-08	1.0271e-07	5.622e-08	3845	tags=45%, list=21%, signal=36%	SPCS1/HSPA5/EXOSC1/EIF4E/CEBPG/EXOC2/DCTN1/EDC4/CNOT6/FKBP14/NPM1/EXOSC9/NFYB/DDIT4/POP4/EXOSC2/IMP3/ASNS/BAG3/DDX10/LSM1/SLC7A5/EXOSC10/EIF4A2/DKC1/NHP2/SRPRB/NOP14/DNAJB9/NOLC1/CNOT4/SEC31A/PAIP1/CNOT2/CKS1B/PARN/SDAD1/HYOU1/EIF2AK3/HSPA9/PDIA6/CALR/XPOT/MTHFD2/EIF2S1/XBP1/HSP90B1
HALLMARK_MTORC1_SIGNALING	HALLMARK_MTORC1_SIGNALING	192	-0.374806	-1.95464	3.51002e-07	2.19377e-06	1.2008e-06	3344	tags=35%, list=18%, signal=29%	SCD/M6PR/SDF2L1/SLC1A5/PIK3R3/GGA2/SHMT2/TRIB3/IMMT/FKBP2/CCNG1/DDIT4/AURKA/GOT1/INSIG1/ASNS/NUFIP1/TUBG1/ADIPOR2/RPA1/PPA1/CYP51A1/AK4/SLC7A5/CTSC/ATP2A2/PNP/EBP/MCM2/UFM1/UCHL5/EEF1E1/PLOD2/LDHA/HPRT1/PSMA4/TES/GMPS/PSMA3/MTHFD2L/UNG/CYB5B/ARPC5L/TCEA1/PSMG1/LDLR/ACLY/PRDX1/TFRC/SYTL2/USO1/CANX/PPIA/STARD4/HSPA9/HSPE1/RDH11/CALR/ELOVL6/NUP205/GCLC/CCT6A/MTHFD2/MCM4/PSMC2/XBP1/PSMD14/HSP90B1
HALLMARK_DNA_REPAIR	HALLMARK_DNA_REPAIR	144	-0.365489	-1.82268	2.37296e-05	0.000131831	7.21601e-05	4150	tags=43%, list=22%, signal=34%	GTF2H1/DUT/AK1/POLR2I/TYMS/RAD52/LIG1/SAC3D1/DGCR8/GTF2A2/EDF1/CMPK2/CETN2/POLE4/RALA/POLR1D/DDB1/TAF1C/POLR2E/GUK1/RFC3/TAF6/DDB2/DCTN4/MPC2/POLR2H/SRSF6/ERCC3/ALYREF/PNP/COX17/POLR2K/POLR1C/HPRT1/RPA3/MRPL40/ZWINT/BOLA2/GTF2H5/DGUOK/POLR3GL/POLR2G/PRIM1/RNMT/ITPA/FEN1/NCBP2/SMAD5/RBX1/AK3/ERCC4/NUDT21/UMPS/RFC4/ARL6IP1/TMED2/PCNA/ADA/UPF3B/NUDT9/NFX1/CSTF3
HALLMARK_APICAL_JUNCTION	HALLMARK_APICAL_JUNCTION	189	0.326092	1.7515	3.00497e-05	0.000150249	8.22413e-05	5966	tags=47%, list=32%, signal=32%	MMP9/CRB3/CNN2/VASP/PTEN/SIRPA/ARPC2/ITGA3/ACTN1/RAC2/MYH9/SYK/ZYX/CAP1/CD209/MPZL2/MAPK13/ACTN3/AMIGO1/MAPK14/GNAI2/ACTN4/MYH10/ACTB/NRXN2/SDC3/TJP1/DHX16/CLDN5/NLGN3/HADH/DSC3/COL9A1/BMP1/CADM3/LAMC2/AKT2/CTNND1/THBS3/SKAP2/PCDH1/PECAM1/B4GALT1/CLDN15/ADAM23/DSC1/SLC30A3/ADAM15/CDSN/GTF2F1/LAMB3/MADCAM1/INPPL1/PIK3CB/PARD6G/MAP4K2/TSPAN4/TMEM8B/PARVA/ADAMTS5/ADRA1B/NRTN/CD34/DMP1/STX4/ITGB4/CDH…
HALLMARK_MYOGENESIS	HALLMARK_MYOGENESIS	195	0.306225	1.65417	0.000191582	0.000870828	0.000476664	6662	tags=49%, list=36%, signal=32%	SVIL/FLII/NAV2/MB/ACSL1/PICK1/ATP6AP1/MYH9/MEF2D/SIRT2/CNN3/TSC2/PDLIM7/GAA/GPX3/CTF1/ACTN3/LSP1/PDE4DIP/TNNI1/AEBP1/GABARAPL2/HDAC5/TNNI2/BDKRB2/CKB/NOTCH1/SYNGR2/FABP3/HSPB2/KCNH1/TCAP/MYBPC3/PYGM/SGCA/FXYD1/PPFIA4/ATP2A1/AKT2/MYH1/TGFB1/FOXO4/CHRNA1/APOD/APLNR/SPHK1/SMTN/ANKRD2/CFD/CKM/EFS/KLF5/TPM2/GNAO1/CKMT2/MAPRE3/DTNA/REEP1/ITGB4/VIPR1/TPM3/DES/OCEL1/COX7A1/PGAM2/COL1A1/LDB3/MYH2/PKIA/CAC…
HALLMARK_MYC_TARGETS_V2	HALLMARK_MYC_TARGETS_V2	56	-0.452734	-1.91959	0.000456153	0.00190064	0.00104035	4458	tags=48%, list=24%, signal=37%	WDR74/PRMT3/FARSA/PPRC1/MYBBP1A/GNL3/NOP16/NOP2/NPM1/DCTPP1/WDR43/CDK4/NDUFAF4/PUS1/SUPV3L1/PA2G4/MPHOSPH10/NOLC1/DUSP2/CBX3/UNG/DDX18/TFB2M/HSPE1/NIP7/AIMP2/MCM4
HALLMARK_TNFA_SIGNALING_VIA_NFKB	HALLMARK_TNFA_SIGNALING_VIA_NFKB	194	0.281747	1.51977	0.00132012	0.00507738	0.0027792	4445	tags=37%, list=24%, signal=28%	CEBPB/BCL6/TLR2/CEBPD/IRS2/IFNGR2/EDN1/CXCL1/PFKFB3/TNFRSF9/NFIL3/BCL3/CXCL6/SLC2A3/ATF3/RHOB/TNFAIP2/B4GALT5/SNN/TNC/SGK1/KLF2/ETS2/SQSTM1/TNFSF9/TRIB1/CLCF1/CFLAR/DENND5A/KDM6B/NFKB2/CSF1/IL23A/LITAF/MXD1/RNF19B/DRAM1/ZFP36/RELB/CXCL2/ICOSLG/FOSL1/DUSP1/PTPRE/NFKB1/PPP1R15A/JAG1/PLAU/F2RL1/PDLIM5/BCL2A1/TNIP1/PTGS2/B4GALT1/MCL1/SPHK1/FOS/LAMB3/KLF6/NINJ1/F3/SOD2/IER3/TRIP10/PLAUR/NR4A3/IL1A/NAM…
HALLMARK_FATTY_ACID_METABOLISM	HALLMARK_FATTY_ACID_METABOLISM	153	-0.310589	-1.56829	0.00162035	0.00578698	0.00316761	4760	tags=39%, list=26%, signal=29%	PSME1/ECI1/ADH7/ADSL/D2HGDH/LGALS1/PRDX6/GSTZ1/MGLL/DECR1/ACSS1/CBR1/NBN/NTHL1/HMGCS1/CPT1A/HIBCH/GCDH/UBE2L6/UROD/MIF/ECHS1/RAP1GDS1/ODC1/SLC22A5/MDH2/PPARA/HSD17B10/ECI2/GRHPR/S100A10/ECH1/METAP1/HPGD/PTS/OSTC/ADIPOR2/UROS/NSDHL/ACAT2/HSD17B4/ERP29/APEX1/LDHA/CRYZ/ACAA2/HSPH1/MCEE/ACSL5/SUCLA2/CPOX/MDH1/ACADM/HSP90AA1/SUCLG2/UGDH/RDH11/BCKDHB/FH/GPD2
HALLMARK_INFLAMMATORY_RESPONSE	HALLMARK_INFLAMMATORY_RESPONSE	198	0.280437	1.51814	0.0018027	0.006009	0.00328914	4941	tags=38%, list=26%, signal=28%	CSF3R/AQP9/C5AR1/PROK2/TLR2/CD82/CCL7/TLR1/RAF1/PVR/IFNGR2/EDN1/RHOG/IL1R1/ITGA5/TNFRSF9/FPR1/IFNAR1/ADM/BEST1/CXCL6/PTAFR/IL10/PSEN1/MET/CD14/CSF3/TNFSF9/AXL/CSF1/OSMR/TIMP1/MXD1/SELL/IL18RAP/KIF1B/ICOSLG/PTPRE/CCL24/NFKB1/GPR132/STAB1/OPRK1/HPN/LYN/DCBLD2/SELE/GPC3/APLNR/TACR3/SPHK1/RGS16/KLF6/F3/CCL17/CXCL8/PLAUR/IL4R/IL1A/FFAR2/GNA15/PTGIR/NAMPT/MEFV/ADORA2B/INHBA/IRF1/NFKBIA/P2RX4/BTG2/P2RY2…
HALLMARK_KRAS_SIGNALING_DN	HALLMARK_KRAS_SIGNALING_DN	192	0.273654	1.47627	0.0025409	0.00794031	0.00434627	5065	tags=36%, list=27%, signal=26%	FGGY/EDN1/FSHB/NPHS1/GRID2/BRDT/MAST3/IL5/CALML5/CELSR2/SNCB/SNN/SGK1/CAPN9/SLC38A3/ADRA2C/CD207/HTR1D/SHOX2/CYP11B2/SLC6A3/CCNA1/CYP39A1/KRT4/CD40LG/RGS11/TAS2R4/CAMK1D/AMBN/ATP6V1B1/KRT5/PDCD1/TSHB/KLK7/SLC30A3/CALCB/EFHD1/CPB1/ABCG4/P2RY4/CKM/SPTBN2/CDH16/KCNMB1/NTF3/HTR1B/PKP1/INSL5/GPRC5C/SMPX/SCGB1A1/PAX4/VPREB1/SERPINA10/KLK8/DTNB/NRIP2/BMPR1B/MEFV/CPEB3/HNF1A/BTG2/SLC25A23/NUDT11/ITIH3/ZB…
HALLMARK_ALLOGRAFT_REJECTION	HALLMARK_ALLOGRAFT_REJECTION	195	-0.283173	-1.48406	0.00455461	0.0133959	0.00733249	3438	tags=31%, list=18%, signal=25%	IKBKB/ELF4/TAP1/ITGAL/IL27RA/NPM1/PF4/HLA-DMA/ZAP70/SOCS5/EIF3D/RPL9/CXCR3/HLA-DQA1/F2R/NCK1/MAP3K7/IL12RB1/MRPL3/SOCS1/IL15/CD3D/RPS19/RPS3A/TPD52/RPL39/CCL5/CD247/ABCE1/PRF1/LCK/MTIF2/ETS1/CCR5/STAT1/CD96/CD3E/IRF4/NCR1/TAP2/CD8A/CD2/IL2RB/IFNG/GPR65/CRTAM/CD3G/GZMA/ITK/IL7/STAT4/CCND2/KLRD1/CCL4/GZMB/CD47/EIF3J/UBE2N/FASLG/EIF3A
HALLMARK_COAGULATION	HALLMARK_COAGULATION	136	0.288168	1.46993	0.00638959	0.0177489	0.00971516	6193	tags=44%, list=33%, signal=30%	MMP9/CPQ/GNB2/F9/SERPINA1/RAC1/LAMP2/SIRT2/FURIN/KLF7/F2/CPN1/S100A13/THBD/TIMP1/CASP9/TMPRSS6/C8A/HRG/CAPN5/CTSV/BMP1/S100A1/APOC3/C8B/PLAU/MMP8/HPN/MSRB2/CTSK/PEF1/HNF4A/PECAM1/TF/F12/FGA/CFD/F3/HTRA1/C9/KLK8/MMP7/HMGCS2/ANG/TIMP3/APOA1/C8G/CTSE/MAFF/MST1/PROZ/MEP1A/ACOX2/RABIF/VWF/GSN/SERPINB2/C2/F13B/APOC1
HALLMARK_UV_RESPONSE_UP	HALLMARK_UV_RESPONSE_UP	154	0.280001	1.45013	0.00857002	0.0225527	0.0123446	4652	tags=38%, list=25%, signal=29%	SULT1A1/ACAA1/ARRB2/DGAT1/TST/PRKCD/MARK2/ALDOA/CLTB/TUBA4A/BSG/GPX3/EPHX1/ATF3/RHOB/FURIN/CCK/CDC34/AGO2/NPTXR/RPN1/SQSTM1/STARD3/YKT6/SHOX2/CHKA/HTR7/CLCN2/HSPA2/BID/HYAL2/CXCL2/CDKN2B/PRKACA/PPIF/CTSV/LYN/GRINA/CDO1/TACR3/MGAT1/ALAS1/TCHH/FOS/RAB27A/PDLIM3/SLC6A12/SOD2/PDAP1/MSX1/TMBIM6/RRAD/HLA-F/PPT1/IRF1/NFKBIA/SPR/MAOA/BTG2
HALLMARK_PROTEIN_SECRETION	HALLMARK_PROTEIN_SECRETION	95	-0.320232	-1.50343	0.00935731	0.0233933	0.0128047	4151	tags=38%, list=22%, signal=30%	AP2B1/SNX2/RAB22A/SCRN1/RPS6KA3/RAB9A/ARFGEF1/MON2/AP2S1/M6PR/SSPN/VAMP4/BET1/VAMP7/GALC/TMED10/BNIP3/AP3B1/TPD52/CTSC/ARFGEF2/ZW10/COG2/NAPG/COPB1/GOLGA4/CLCN3/SEC31A/TMX1/VPS45/USO1/TMED2/SOD1/ANP32E/LMAN1/DNM1L
HALLMARK_IL6_JAK_STAT3_SIGNALING	HALLMARK_IL6_JAK_STAT3_SIGNALING	87	0.320578	1.49968	0.0119828	0.0285305	0.0156167	2783	tags=28%, list=15%, signal=24%	CSF3R/CSF2RA/TLR2/TNFRSF1A/CCL7/IL17RA/IL10RB/GRB2/IFNGR2/CXCL1/IL1R1/IL1R2/CBL/IFNAR1/TNFRSF12A/CD14/STAT3/CSF1/OSMR/IFNGR1/LTB/CRLF2/TYK2/TGFB1
HALLMARK_HYPOXIA	HALLMARK_HYPOXIA	191	0.262969	1.41492	0.0126861	0.028832	0.0157817	3838	tags=30%, list=21%, signal=24%	RBPJ/SLC6A6/RRAGD/PGM2/IRS2/ALDOA/GPC1/MYH9/PDK3/PFKFB3/S100A4/PGM1/COL5A1/NFIL3/PRDX5/IDS/ADM/FOXO3/SLC2A3/GAA/ATF3/HK2/CHST3/KLF7/GAPDH/HS3ST1/AMPD3/SLC37A4/SDC3/PGK1/GCNT2/NDST1/EFNA3/ZFP36/LXN/PYGM/DUSP1/PPP1R15A/PPFIA4/DDIT3/NAGK/KDELR3/GPC3/GPC4/PPARGC1A/LALBA/IGFBP1/FOS/KLF6/BCAN/F3/EXT1/TGM2/IER3/DPYSL4/PKP1/CCNG2
HALLMARK_COMPLEMENT	HALLMARK_COMPLEMENT	195	0.249043	1.34528	0.0206762	0.0449482	0.0246032	2073	tags=21%, list=11%, signal=19%	CEBPB/CPQ/GNB2/MSRB1/CDA/CR1/HSPA1A/RAF1/APOA4/PRKCD/GRB2/F5/SERPINA1/LTF/RHOG/CTSD/CXCL1/S100A12/PCSK9/LAMP2/WAS/S100A9/TIMP2/PSEN1/NOTCH4/KLK1/PRSS3/F2/HPCAL4/GCA/PPP4C/FCN1/ITGAM/GNAI2/PRSS36/S100A13/PHEX/TIMP1/CASP9/CDK5R1/TMPRSS6

## Sheet: CCL8_GSEA_result
Online Resource 4. GSEA results for biomarkers MMP9 and CCL8.
ID	Description	setSize	enrichmentScore	NES	pvalue	p.adjust	qvalue	rank	leading_edge	core_enrichment
HALLMARK_INTERFERON_ALPHA_RESPONSE	HALLMARK_INTERFERON_ALPHA_RESPONSE	93	0.631962	2.89166	1e-10	2.5e-09	1.73684e-09	4546	tags=70%, list=24%, signal=53%	TRIM14/SAMD9/USP18/DDX60/PNPT1/ISG15/NUB1/CXCL10/RTP4/TAP1/TRIM5/CMTR1/RSAD2/CMPK2/NCOA7/IFIH1/IFI44/EPSTI1/SAMD9L/TRIM26/STAT2/PARP14/IFI44L/CD47/EIF2AK2/IFIT2/UBE2L6/LAMP3/IL7/MX1/OAS1/OASL/IFIT3/TDRD7/BST2/CNP/SP110/PARP12/CXCL11/TRIM21/DHX58/ELF1/PSMA3/BATF2/OGFR/HERC6/GBP4/PSMB9/MOV10/NMI/ADAR/LY6E/PLSCR1/GMPR/CCRL2/PROCR/IFI35/CD74/IRF9/LPAR6/IRF2/IRF7/TXNIP/LAP3/PARP9
HALLMARK_INTERFERON_GAMMA_RESPONSE	HALLMARK_INTERFERON_GAMMA_RESPONSE	194	0.519275	2.66442	1e-10	2.5e-09	1.73684e-09	4542	tags=56%, list=24%, signal=43%	TRIM14/PML/USP18/CASP3/VAMP5/DDX60/PNPT1/ISG15/TNFAIP6/CXCL10/STAT1/RTP4/TAP1/GCH1/MT2A/CMTR1/OAS2/SLAMF7/RSAD2/CMPK2/IFIH1/MTHFD2/IFI44/EPSTI1/SAMD9L/SPPL2A/NOD1/TRIM26/STAT2/PARP14/IFI44L/EIF2AK2/PTPN2/IFIT2/SSPN/C1R/UBE2L6/ZNFX1/SOCS1/IL7/RIPK1/GBP6/MX1/XAF1/IFIT1/ST3GAL5/OASL/LYSMD2/APOL6/PNP/IFIT3/TDRD7/PFKP/BST2/SERPING1/GPR18/XCL1/SP110/OAS3/PARP12/PSMB2/FGL2/CD38/CXCL11/TRIM21/LCP2/DHX58/…
HALLMARK_MYC_TARGETS_V1	HALLMARK_MYC_TARGETS_V1	188	0.426532	2.18623	3.77634e-10	6.29391e-09	4.37261e-09	4738	tags=44%, list=25%, signal=33%	SF3B3/EIF3J/CTPS1/EIF2S1/MRPS18B/MCM6/AIMP2/PSMD14/VDAC3/NOLC1/G3BP1/CANX/UBA2/NCBP1/PSMA4/GOT2/DEK/SYNCRIP/SNRPD1/NHP2/PRPS2/SNRPG/KPNA2/STARD7/DDX21/SET/UBE2E1/HNRNPA2B1/HNRNPA3/CCT2/DDX18/NCBP2/DHX15/PSMD7/RUVBL2/PWP1/SNRPB2/PSMB2/MCM2/SSB/CDC20/XPOT/YWHAQ/RPL22/GLO1/USP1/PSMA1/CLNS1A/PCNA/TARDBP/BUB3/GSPT1/VDAC1/MCM4/PPM1G/ERH/HNRNPR/SNRPD3/PPIA/CCT3/SNRPA1/ABCE1/EXOSC7/POLE3/MCM5/SNRPA/PSMC4…
HALLMARK_E2F_TARGETS	HALLMARK_E2F_TARGETS	192	0.383511	1.96809	2.85169e-07	3.56461e-06	2.47646e-06	4503	tags=40%, list=24%, signal=31%	RACGAP1/CTPS1/EIF2S1/MCM6/RFC1/ING3/ZW10/PPP1R8/BRCA2/BRMS1L/UNG/CKS1B/CKS2/ANP32E/NUP107/NOLC1/MTHFD2/WEE1/DEK/AK2/SYNCRIP/EED/RAD50/NBN/KPNA2/SMC6/BUB1B/SMC4/RFC3/CCP110/ORC6/TUBG1/BARD1/MLH1/E2F8/ATAD2/HUS1/HMGB3/MCM2/SPAG5/DLGAP5/RAD1/CDC20/STMN1/CDK1/CCNE1/POLD1/CSE1L/USP1/NUDT21/PCNA/MELK/AURKB/GSPT1/SMC1A/MCM4/DEPDC1/NUP205/TFRC/SPC24/PHF5A/RPA1/MCM3/GINS1/RPA3/DCK/MCM5/TUBB/RNASEH2A/AURKA…
HALLMARK_G2M_CHECKPOINT	HALLMARK_G2M_CHECKPOINT	188	0.350385	1.79593	8.85899e-06	8.85899e-05	6.15467e-05	5576	tags=46%, list=30%, signal=32%	TTK/PML/RACGAP1/PBK/FBXO5/MCM6/SFPQ/TOP1/BRCA2/MT2A/HSPA8/CDC7/CKS1B/CKS2/SMC2/NOLC1/G3BP1/CENPF/HIRA/CDC27/KATNA1/DTYMK/SYNCRIP/SNRPD1/PURA/KPNA2/SMC4/ORC6/SLC7A5/DMD/BARD1/KIF15/HUS1/HMGB3/MCM2/ATRX/RBL1/CDC20/STMN1/SLC12A2/CDK1/ORC5/HOXC10/TPX2/TNPO2/AURKB/CUL4A/BUB3/GSPT1/SMC1A/NEK2/EWSR1/CCNF/NUSAP1/MCM3/RBM14/E2F3/KIF11/MCM5/WRN/E2F2/AURKA/YTHDC1/DR1/MYBL2/DBF4/HIF1A/KIF23/GINS2/KPNB1/CUL5/…
HALLMARK_TNFA_SIGNALING_VIA_NFKB	HALLMARK_TNFA_SIGNALING_VIA_NFKB	194	-0.328449	-1.69653	0.000121927	0.00101606	0.000705895	3280	tags=35%, list=18%, signal=29%	PPP1R15A/MYC/YRDC/PTPRE/NR4A3/INHBA/FOS/STAT5A/CXCL2/CD83/SERPINB2/PANX1/NAMPT/FOSL2/PFKFB3/SLC2A3/TRIB1/ATF3/MARCKS/TNIP2/GADD45A/PNRC1/CLCF1/RELB/BCL3/NFKB2/F3/KDM6B/ZFP36/DENND5A/TNFSF9/SGK1/TNFRSF9/CXCL6/B4GALT5/ICOSLG/NFKB1/KLF2/SOD2/NFKBIA/PDLIM5/IFNGR2/TLR2/B4GALT1/RHOB/KLF6/BTG2/PLAU/BCL2A1/BCL6/DUSP1/IL6/SDC4/CXCL1/CEBPD/CXCL3/EDN1/BHLHE40/NFIL3/TNF/OLR1/TRIP10/MAFF/CEBPB/IRS2/CSF1/PTGS2
HALLMARK_HYPOXIA	HALLMARK_HYPOXIA	191	-0.307475	-1.57802	0.000707662	0.00505473	0.00351171	3621	tags=29%, list=19%, signal=23%	FOS/ANKZF1/MYH9/INHA/GPC1/HK2/FOSL2/PFKFB3/SLC2A3/ATF3/GALK1/PNRC1/EFNA3/KIF5A/SLC6A6/PPFIA4/MAP3K1/TPI1/F3/ALDOA/BCAN/SLC2A5/ZFP36/PYGM/DTNA/SDC3/SLC37A4/CDKN1B/HS3ST1/PGM2/DPYSL4/GAA/KLF6/LXN/KDELR3/DUSP1/IL6/PRDX5/DDIT3/SDC4/TGFB3/S100A4/RRAGD/FOXO3/ILVBL/BHLHE40/NFIL3/CXCR4/MAFF/IDS/KLF7/COL5A1/IRS2/RBPJ/GAPDHS
HALLMARK_REACTIVE_OXYGEN_SPECIES_PATHWAY	HALLMARK_REACTIVE_OXYGEN_SPECIES_PATHWAY	47	-0.440653	-1.7896	0.0036667	0.0229169	0.0159212	2657	tags=38%, list=14%, signal=33%	MBP/GPX4/FES/CAT/ERCC2/PRDX2/GPX3/LSP1/SBNO2/SOD2/MSRA/FTL/OXSR1/MGST1/NDUFS2/MPO/HMOX2/CDKN2D
HALLMARK_APICAL_JUNCTION	HALLMARK_APICAL_JUNCTION	189	-0.289447	-1.48522	0.00415179	0.0230655	0.0160244	4959	tags=37%, list=27%, signal=27%	ZYX/MAPK13/PFN1/ACTG2/GTF2F1/CLDN19/GRB7/ACTA1/CADM3/YWHAH/THBS3/CERCAM/MADCAM1/ACTB/CLDN7/SIRPA/ADAM15/SYK/GNAI2/VWF/NRTN/CD209/ITGA3/MYH9/AKT2/CAP1/ICAM4/ACTC1/RAC2/CTNND1/ADAM23/TAOK2/PARVA/ACTN1/SORBS3/SLC30A3/TJP1/DSC3/SRC/LAMC2/LAMA3/NRAP/SDC3/CDH15/TSPAN4/MVD/DHX16/STX4/PTEN/B4GALT1/NF2/PCDH1/ACTN4/MDK/MAP4K2/CNN2/ACTN3/KRT31/NLGN3/COL9A1/CLDN5/ARPC2/CRB3/RASA1/VASP/BMP1/CD34/ITGA10/MMP9/A…
HALLMARK_UV_RESPONSE_UP	HALLMARK_UV_RESPONSE_UP	154	-0.29527	-1.47488	0.00588161	0.0294081	0.0204309	3414	tags=29%, list=18%, signal=24%	CXCL2/BSG/MAOA/FURIN/CDO1/AGO2/CLTB/ATF3/APOM/PRKCD/ALDOA/CTSV/SIGMAR1/TACR3/CDC34/CLCN2/LYN/ACAA1/HYAL2/NPTX2/CDK2/GPX3/CCK/PRKACA/SOD2/NFKBIA/ARRB2/RHOB/DGAT1/HNRNPU/BTG2/STARD3/CHKA/IL6/RXRB/TST/SULT1A1/MGAT1/NPTXR/TUBA4A/EPHX1/YKT6/MARK2/PPIF/GAL
HALLMARK_UNFOLDED_PROTEIN_RESPONSE	HALLMARK_UNFOLDED_PROTEIN_RESPONSE	104	0.318925	1.47578	0.00978264	0.040761	0.0283182	2117	tags=22%, list=11%, signal=20%	EIF2S1/CNOT6/HSP90B1/XBP1/PDIA6/CNOT4/CKS1B/NOLC1/MTHFD2/EXOC2/NFYB/HYOU1/NHP2/PAIP1/IFIT1/SSR1/CALR/SLC7A5/HSPA9/DDX10/SRPRB/XPOT/NABP1
HALLMARK_MTORC1_SIGNALING	HALLMARK_MTORC1_SIGNALING	192	0.273952	1.40586	0.00960714	0.040761	0.0283182	4554	tags=36%, list=24%, signal=27%	HSP90B1/XBP1/CCT6A/PSMC2/PSMD14/UNG/MTHFD2/ELOVL6/CANX/BCAT1/PSMA4/USO1/CYB5B/STC1/DHCR7/PSMG1/FDXR/TUBG1/SSR1/CALR/SLC7A5/PNP/ADIPOR2/HSPA9/LDLR/PLOD2/TBK1/FGL2/RDH11/PIK3R3/MCM2/ABCF2/CCNG1/PITPNB/SDF2L1/PSMA3/ACSL3/AK4/GCLC/ACLY/MCM4/SYTL2/PPA1/NUP205/TFRC/NUFIP1/PPIA/GGA2/RPA1/CCNF/STARD4/ACTR2/TES/PRDX1/ATP2A2/PSMC4/LDHA/ASNS/AURKA/SERP1/VLDLR/EIF2S2/HSPE1/SORD/NUPR1/GLRX/HSPD1/GBE1/ARPC5L
